# Supplementary material for: Maturation and substrate processing topography of the Plasmodium falciparum invasion/egress protease plasmepsin X
Source: Research Square preprint supplement (doi:10.21203/rs.3.rs-1214907/v1), 2022-01-07
Supplement: Supplementary file 3 [file 7a4cceee68a7a548cb343bb2.xls]

Sequence	Prob	Mascot Ion score	Mascot Identity score	Mascot Delta Ion Score	NTT	Modifications	Observed	Actual Mass	Charge	TIC	Delta Da	Start	Delta PPM	Stop	Retention Time
(K)ESSHVIPLK(L)	100%	50.27	25	33.09	2		505.2874	1,008.56	2	117074	-0.0002539	57	-0.2515	65	1,808.62
(K)ESSHVIPLK(L)	100%	34.95	25	17.55	2		505.2872	1,008.56	2	37,950.00	-0.0005599	57	-0.5546	65	1,824.67
(K)ESSHVIPLKLNK(K)	99%	16.63	25	16.63	2		455.6019	1,363.78	3	95,686.60	0.001489	57	1.091	68	1,964.75
(K)YYVNRGEGISGSLGTSSGNTLDDmDLINEEINK(K)	99%	112.35	25	112.35	2	Oxidation (+16)	1,193.23	3,576.66	3	26,175.90	0.004876	91	1.363	123	4,130.25
(K)YYVNRGEGISGSLGTSSGNTLDDMDLINEEINK(K)	96%	101.61	25	101.61	2		1,187.89	3,560.64	3	16,643.60	-0.02231	91	-6.263	123	4,712.51
(R)GEGISGSLGTSSGNTLDDmDLINEEINK(K)	100%	79.46	25	79.16	2	Oxidation (+16)	961.4442	2,881.31	3	92,589.50	-0.003354	96	-1.164	123	4,326.59
(R)GEGISGSLGTSSGNTLDDmDLINEEINK(K)	100%	85.12	25	85.12	2	Oxidation (+16)	961.4466	2,881.32	3	53,161.30	0.003969	96	1.377	123	4,308.80
(R)GEGISGSLGTSSGNTLDDMDLINEEINK(K)	100%	67.12	25	67.12	2		1,433.66	2,865.31	2	20,059.90	-0.00867	96	-3.025	123	5,037.59
(R)GEGISGSLGTSSGNTLDDmDLINEEINKK(R)	100%	71.29	25	71.29	2	Oxidation (+16)	1,004.14	3,009.41	3	24,918.30	-0.001432	96	-0.4757	124	3,827.24
(R)GEGISGSLGTSSGNTLDDmDLINEEINKK(R)	100%	87.86	25	87.86	2	Oxidation (+16)	1,004.14	3,009.41	3	21,374.80	0.001133	96	0.3764	124	3,851.19
(R)GEGISGSLGTSSGNTLDDMDLINEEINKK(R)	98%	95.56	25	95.03	2		998.8165	2,993.43	3	48,042.10	0.0135	96	4.509	124	4,520.42
(R)GEGISGSLGTSSGNTLDDMDLINEEINKKR(T)	100%	72.36	25	72.36	2		788.3865	3,149.52	4	89,693.20	0.00187	96	0.5936	125	4,171.66
(R)GEGISGSLGTSSGNTLDDmDLINEEINKKR(T)	100%	70.04	25	70.04	2	Oxidation (+16)	792.3865	3,165.52	4	162170	0.006711	96	2.119	125	3,523.02
(R)GEGISGSLGTSSGNTLDDMDLINEEINKKR(T)	100%	80.8	25	80.8	2		788.3873	3,149.52	4	54,965.30	0.005042	96	1.6	125	4,189.30
(R)TNAQLDEKNF(L)	100%	39.91	25	39.5	1		590.2878	1,178.56	2	17,998.50	0.00414	126	3.51	135	6,532.41
(R)TNAQLDEKNF(L)	100%	41.83	25	41.83	1		590.2865	1,178.56	2	28,104.20	0.001576	126	1.336	135	2,021.37
(R)TNAQLDEKNF(L)	100%	35.14	25	35.14	1		590.2853	1,178.56	2	13,307.60	-0.0007439	126	-0.6307	135	1,444.17
(R)TNAQLDEKNF(L)	100%	24.45	25	24.45	1		590.2861	1,178.56	2	8,220.14	0.0007221	126	0.6121	135	1,541.03
(R)TNAQLDEKNF(L)	100%	22.36	25	22.36	1		590.2864	1,178.56	2	10,240.40	0.001454	126	1.233	135	1,491.74
(R)TNAQLDEKNF(L)	100%	22.77	25	22.77	1		590.2865	1,178.56	2	8,249.56	0.001576	126	1.336	135	1,507.41
(R)TNAQLDEKNF(L)	100%	22.85	25	19.1	1		590.2863	1,178.56	2	5,747.38	0.00121	126	1.026	135	7,486.40
(R)TNAQLDEKNF(L)	100%	25.73	25	25.73	1		590.2877	1,178.56	2	28,680.60	0.003896	126	3.303	135	7,283.36
(R)TNAQLDEKNF(L)	100%	21.66	25	21.66	1		590.286	1,178.56	2	17,822.60	0.0006001	126	0.5087	135	6,468.84
(R)TNAQLDEKNF(L)	100%	22.08	25	22.08	1		590.2863	1,178.56	2	18,847.10	0.00121	126	1.026	135	6,635.35
(R)TNAQLDEKNF(L)	100%	19.68	25	19.68	1		590.2858	1,178.56	2	21,096.30	0.0002341	126	0.1984	135	6,585.14
(R)TNAQLDEKNF(L)	100%	20.33	25	20.33	1		590.2859	1,178.56	2	13,056.90	0.0003561	126	0.3019	135	5,470.98
(R)TNAQLDEKNF(L)	100%	20.19	25	20.19	1		590.286	1,178.56	2	11,414.20	0.0004781	126	0.4053	135	1,460.10
(R)TNAQLDEKNF(L)	99%	17.57	25	17.57	1		590.2862	1,178.56	2	6,474.42	0.0009661	126	0.819	135	1,571.68
(R)TNAQLDEKNF(L)	99%	17.6	25	17.6	1		590.2868	1,178.56	2	15,160.80	0.002186	126	1.853	135	6,829.80
(R)TNAQLDEKNF(L)	97%	12.78	25	12.78	1		590.2858	1,178.56	2	11,936.20	0.0001121	126	0.095	135	1,475.23
(R)TNAQLDEKNF(L)	95%	13.66	25	13.66	1		590.2869	1,178.56	2	18,647.70	0.002308	126	1.957	135	6,788.69
(R)TNAQLDEKNF(L)	95%	12.37	25	12.37	1		590.2859	1,178.56	2	5,787.36	0.0003561	126	0.3019	135	1,603.41
(R)TNAQLDEKNF(L)	94%	11.99	25	11.99	1		590.2861	1,178.56	2	9,752.17	0.0008441	126	0.7156	135	7,299.46
(R)TNAQLDEKNFLDFTTYNK(N)	100%	70.41	25	70.41	2		721.3522	2,161.03	3	92,434.00	0.001721	126	0.796	143	3,911.32
(R)TNAQLDEKNFLDFTTYNK(N)	100%	102.59	25	102.59	2		721.3518	2,161.03	3	34,731.50	0.0006231	126	0.2882	143	3,946.01
(R)TNAQLDEKNFLDFTTYNK(N)	99%	99.5	25	99.5	2		721.3525	2,161.04	3	238788	0.002819	126	1.304	143	3,928.87
(K)NFLDFTTYNK(N)	100%	40.26	25	40.26	2		631.8051	1,261.60	2	75,958.10	-0.002414	134	-1.912	143	3,927.21
(K)NFLDFTTYNK(N)	100%	31.03	25	31.03	2		631.8065	1,261.60	2	117671	0.0005161	134	0.4087	143	3,947.66
(F)LDFTTYNK(N)	99%	36.23	25	36.23	1		501.2507	1,000.49	2	32,969.40	0.0001201	136	0.1199	143	2,381.31
(F)LDFTTYNK(N)	99%	45.25	25	45.25	1		501.2514	1,000.49	2	42,064.30	0.001524	136	1.522	143	2,415.77
(F)LDFTTYNK(N)	99%	46.46	25	46.46	1		501.2507	1,000.49	2	348733	0.0001201	136	0.1199	143	2,397.74
(K)NKAQDISDHLSDIQK(H)	100%	38.93	25	38.93	2		571.2922	1,710.85	3	15,252.40	0.0007271	144	0.4247	158	2,000.17
(K)NKAQDISDHLSDIQK(H)	100%	57.22	25	52.63	2		571.2925	1,710.86	3	51,366.70	0.001642	144	0.9592	158	1,981.77
(K)AQDISDHLSDIQK(H)	100%	47.16	25	41.47	2		490.5793	1,468.72	3	163200	-0.00004294	146	-0.02922	158	2,087.76
(K)AQDISDHLSDIQK(H)	100%	25.06	25	25.06	2		490.5793	1,468.72	3	19,729.00	-0.0001359	146	-0.09249	158	1,936.47
(K)AQDISDHLSDIQK(H)	100%	63.09	25	61.28	2		735.3651	1,468.72	2	23,182.00	-0.0005199	146	-0.3538	158	2,107.47
(K)AQDISDHLSDIQK(H)	100%	66.6	25	62.04	2		735.3662	1,468.72	2	92,206.10	0.0018	146	1.225	158	2,072.23
(K)AQDISDHLSDIQKHVYEQDAQK(G)	100%	35.2	25	35.2	2		642.8147	2,567.23	4	177589	0.004114	146	1.602	167	2,641.00
(K)AQDISDHLSDIQKHVYEQDAQK(G)	100%	19.16	25	19.16	2		642.8137	2,567.23	4	169179	-0.00003394	146	-0.01322	167	2,625.56
(Q)DISDHLSDIQK(H)	100%	47.98	25	47.98	1		635.8162	1,269.62	2	47,924.10	-0.002598	148	-2.045	158	2,079.08
(K)HVYEQDAQK(G)	100%	31.89	25	31.89	2		559.2676	1,116.52	2	5,113.98	0.0006561	159	0.5871	167	1,693.34
(K)HVYEQDAQK(G)	100%	50.04	25	50.04	2		559.2671	1,116.52	2	314247	-0.0004419	159	-0.3955	167	1,770.17
(K)HVYEQDAQK(G)	100%	26.43	25	26.43	2		559.2676	1,116.52	2	4,017.78	0.0005341	159	0.4779	167	1,661.83
(K)HVYEQDAQK(G)	100%	43.48	25	43.48	2		559.2679	1,116.52	2	9,270.22	0.001266	159	1.133	167	1,739.32
(K)HVYEQDAQK(G)	100%	46.29	25	46.29	2		559.268	1,116.52	2	5,410.90	0.001388	159	1.242	167	1,708.62
(K)HVYEQDAQK(G)	100%	49.65	25	49.65	2		559.2679	1,116.52	2	6,821.27	0.001144	159	1.024	167	1,724.22
(K)HVYEQDAQK(G)	100%	48.06	25	48.06	2		559.2682	1,116.52	2	11,493.70	0.001754	159	1.57	167	1,754.84
(K)HVYEQDAQK(G)	100%	27.37	25	27.37	2		559.2684	1,116.52	2	4,461.49	0.002122	159	1.899	167	1,677.27
(K)HVYEQDAQK(G)	96%	12.73	25	12.73	2		559.2675	1,116.52	2	3,557.11	0.0002901	159	0.2596	167	1,629.55
(N)NSDNSSIEK(N)	100%	28.17	25	28.17	1		497.228	992.4414	2	4,549.50	0.0003721	208	0.3745	216	1,522.79
(N)NSDNSSIEK(N)	100%	30.77	25	26.31	1		497.2284	992.4422	2	3,636.51	0.001104	208	1.111	216	1,554.15
(N)NSDNSSIEK(N)	100%	24.21	25	24.21	1		497.2285	992.4424	2	3,437.34	0.001348	208	1.357	216	1,569.74
(N)NSDNSSIEK(N)	99%	16.58	25	16.58	1		497.228	992.4414	2	2,843.01	0.0003101	208	0.3121	216	1,686.49
(N)NSDNSSIEK(N)	93%	12.88	25	8.67	1		497.2277	992.4409	2	3,050.75	-0.0001779	208	-0.1791	216	1,634.15
(N)NSDNSSIEK(N)	91%	11.47	25	11.47	1		497.2284	992.4423	2	3,649.02	0.001226	208	1.234	216	1,601.20
(N)SDNSSIEK(N)	99%	41.1	25	39.66	1		440.2063	878.398	2	4,265.54	-0.0001239	209	-0.1409	216	1,584.79
(N)SDNSSIEK(N)	99%	31.73	25	28.69	1		440.2065	878.3985	2	3,992.56	0.0003021	209	0.3435	216	1,632.15
(N)SDNSSIEK(N)	99%	26	25	24.23	1		440.2066	878.3986	2	3,781.12	0.0004241	209	0.4822	216	1,616.10
(N)SDNSSIEK(N)	99%	23.37	25	21.42	1		440.2066	878.3987	2	4,346.94	0.0005481	209	0.6232	216	1,663.61
(N)SDNSSIEK(N)	98%	15.28	25	11.05	1		440.2066	878.3987	2	4,535.83	0.0005481	209	0.6232	216	1,569.52
(N)SDNSSIEK(N)	94%	15.41	25	8.87	1		440.2071	878.3996	2	4,988.99	0.001402	209	1.594	216	1,599.86
(N)SDNSSIEK(N)	93%	13.13	25	8.62	1		440.2066	878.3987	2	3,846.28	0.0005481	209	0.6232	216	1,647.52
(N)SDNSSIEK(N)	93%	11.41	25	11.41	1		440.2067	878.3988	2	5,503.43	0.0006081	209	0.6914	216	1,487.47
(N)SDNSSIEK(N)	91%	15.56	25	13.02	1		440.2079	878.4013	2	5,504.03	0.00311	209	3.537	216	1,538.09
(N)SDNSSIEK(N)	91%	10.55	25	10.55	1		440.2066	878.3987	2	4,846.53	0.0005481	209	0.6232	216	1,553.08
(N)SDNSSIEK(N)	91%	11	25	9.5	1		440.2066	878.3987	2	6,011.15	0.0005481	209	0.6232	216	1,454.77
(K)NFIALENK(N)	99%	35.11	25	32.77	2		474.7606	947.5067	2	85,640.40	-0.0009819	217	-1.035	224	2,395.14
(K)NFIALENK(N)	99%	32.97	25	31.32	2		474.7612	947.5079	2	132520	0.0002381	217	0.251	224	2,413.58
(K)NFIALENK(N)	99%	28.87	25	27.68	2		474.7609	947.5072	2	38,325.00	-0.0004939	217	-0.5208	224	2,431.87
(K)NFIALENK(N)	99%	18.43	25	15.3	2		474.761	947.5074	2	25,523.90	-0.0002499	217	-0.2635	224	2,450.96
(A)LENKNATVEQTKENIFLVPLK(H)	100%	31.53	25	31.53	1		607.8416	2,427.34	4	17,630.00	-0.0002179	221	-0.08975	241	3,346.16
(K)NATVEQTKENIFLVPLK(H)	100%	49.71	25	49.71	2		648.6976	1,943.07	3	37,856.10	-0.001902	225	-0.9783	241	3,737.98
(K)NATVEQTKENIFLVPLK(H)	100%	36.83	25	36.83	2		648.6975	1,943.07	3	20,634.60	-0.002268	225	-1.167	241	3,755.49
(N)ATVEQTKENIFLVPLK(H)	100%	47.82	25	47.82	1		610.6839	1,829.03	3	22,981.50	-0.0002009	226	-0.1098	241	3,718.63
(N)ATVEQTKENIFLVPLK(H)	100%	50.61	25	50.61	1		610.6833	1,829.03	3	36,510.50	-0.002031	226	-1.11	241	3,702.76
(A)TVEQTKENIFLVPLK(H)	100%	50.85	25	50.85	1		587.0048	1,757.99	3	37,252.70	-0.0003319	227	-0.1887	241	3,641.14
(A)TVEQTKENIFLVPLK(H)	100%	56.03	25	56.03	1		587.0048	1,757.99	3	39,183.10	-0.0005149	227	-0.2927	241	3,623.81
(E)QTKENIFLVPLK(H)	91%	10.51	25	10.51	1		477.2856	1,428.84	3	21,283.10	0.0008371	230	0.5854	241	3,328.68
(Q)TKENIFLVPLK(H)	100%	38.21	25	38.21	1		434.5984	1,300.77	3	16,789.20	-0.002331	231	-1.791	241	3,333.06
(Q)TKENIFLVPLK(H)	100%	71.73	25	63.52	1		651.395	1,300.78	2	23,787.80	-0.0003059	231	-0.235	241	3,351.01
(T)KENIFLVPLK(H)	100%	51.44	25	51.44	1		600.871	1,199.73	2	25,812.80	-0.0004559	232	-0.3797	241	3,274.55
(K)ENIFLVPLK(H)	100%	39.86	25	39.86	2		536.824	1,071.63	2	15,235.70	0.0004281	233	0.3991	241	5,996.85
(K)ENIFLVPLK(H)	100%	39.77	25	39.77	2		536.8237	1,071.63	2	14,558.60	-0.00006194	233	-0.05775	241	5,431.58
(K)ENIFLVPLK(H)	100%	39.74	25	39.74	2		536.8241	1,071.63	2	24,419.10	0.0006721	233	0.6265	241	4,897.02
(K)ENIFLVPLK(H)	100%	39.64	25	39.64	2		536.8253	1,071.64	2	18,560.40	0.00299	233	2.788	241	5,397.56
(K)ENIFLVPLK(H)	100%	39	25	38.64	2		536.823	1,071.63	2	29,262.60	-0.001526	233	-1.423	241	4,914.27
(K)ENIFLVPLK(H)	100%	38.96	25	38.96	2		536.823	1,071.63	2	36,348.70	-0.001526	233	-1.423	241	4,327.46
(K)ENIFLVPLK(H)	100%	38.96	25	38.96	2		536.8242	1,071.63	2	33,417.20	0.0007941	233	0.7403	241	4,861.57
(K)ENIFLVPLK(H)	100%	41.04	25	41.04	2		536.8239	1,071.63	2	25,246.40	0.0003061	233	0.2853	241	4,963.55
(K)ENIFLVPLK(H)	100%	42.64	25	37.8	2		536.8234	1,071.63	2	36,168.50	-0.0006719	233	-0.6264	241	5,112.54
(K)ENIFLVPLK(H)	100%	38.38	25	38.38	2		536.8239	1,071.63	2	19,003.30	0.0003061	233	0.2853	241	5,346.36
(K)ENIFLVPLK(H)	100%	38.24	25	38.23	2		536.8237	1,071.63	2	45,473.90	-0.00006194	233	-0.05775	241	4,738.46
(K)ENIFLVPLK(H)	100%	39.47	25	35.18	2		536.8241	1,071.63	2	25,269.90	0.0006721	233	0.6265	241	5,093.76
(K)ENIFLVPLK(H)	100%	38.06	25	38.06	2		536.8238	1,071.63	2	17,310.90	0.00006206	233	0.05786	241	5,618.34
(K)ENIFLVPLK(H)	100%	41.8	25	41.8	2		536.8239	1,071.63	2	15,321.70	0.0001841	233	0.1716	241	5,312.80
(K)ENIFLVPLK(H)	100%	37.85	25	37.85	2		536.8243	1,071.63	2	20,651.30	0.00116	233	1.081	241	5,294.19
(K)ENIFLVPLK(H)	100%	37.84	25	37.84	2		536.8241	1,071.63	2	12,152.10	0.0006721	233	0.6265	241	6,214.23
(K)ENIFLVPLK(H)	100%	33.51	25	33.51	2		536.8238	1,071.63	2	76,060.20	0.00006206	233	0.05786	241	4,658.72
(K)ENIFLVPLK(H)	100%	48.08	25	48.08	2		536.8238	1,071.63	2	22,357.70	0.00006206	233	0.05786	241	5,032.62
(K)ENIFLVPLK(H)	100%	48.78	25	48.1	2		536.8238	1,071.63	2	44,663.40	0.00006206	233	0.05786	241	4,755.25
(K)ENIFLVPLK(H)	100%	35.82	25	35.82	2		536.8239	1,071.63	2	78,254.80	0.0001841	233	0.1716	241	4,643.73
(K)ENIFLVPLK(H)	100%	35.65	25	35.65	2		536.8239	1,071.63	2	29,418.10	0.0001841	233	0.1716	241	4,981.00
(K)ENIFLVPLK(H)	100%	30.59	25	30.59	2		536.8238	1,071.63	2	14,172.30	0.00006206	233	0.05786	241	5,515.25
(K)ENIFLVPLK(H)	100%	30.13	25	30.13	2		536.8238	1,071.63	2	13,004.40	0.00006206	233	0.05786	241	5,771.94
(K)ENIFLVPLK(H)	100%	31.87	25	31.87	2		536.8239	1,071.63	2	15,988.50	0.0001841	233	0.1716	241	6,376.55
(K)ENIFLVPLK(H)	100%	52.06	25	52.06	2		536.8238	1,071.63	2	17,121.90	0.00006206	233	0.05786	241	5,162.69
(K)ENIFLVPLK(H)	100%	36.29	25	36.29	2		536.8241	1,071.63	2	19,965.20	0.0006721	233	0.6265	241	5,129.35
(K)ENIFLVPLK(H)	100%	43.03	25	43.03	2		536.824	1,071.63	2	17,470.60	0.0005501	233	0.5128	241	5,244.22
(K)ENIFLVPLK(H)	100%	25.42	25	25.42	2		536.8238	1,071.63	2	14,337.50	0.00006206	233	0.05786	241	6,166.67
(K)ENIFLVPLK(H)	100%	36.56	25	36.56	2		536.8242	1,071.63	2	15,244.70	0.0007941	233	0.7403	241	5,875.58
(K)ENIFLVPLK(H)	100%	36.16	25	36.16	2		536.8236	1,071.63	2	71,857.70	-0.0003059	233	-0.2852	241	4,673.82
(K)ENIFLVPLK(H)	100%	36.29	25	36.29	2		536.8242	1,071.63	2	16,519.50	0.0007941	233	0.7403	241	5,277.48
(K)ENIFLVPLK(H)	100%	34.62	25	34.62	2		536.8242	1,071.63	2	25,851.30	0.0007941	233	0.7403	241	5,195.98
(K)ENIFLVPLK(H)	100%	53.99	25	53.07	2		536.8237	1,071.63	2	860949	-0.00006194	233	-0.05775	241	4,407.39
(K)ENIFLVPLK(H)	100%	25.28	25	25.28	2		536.8239	1,071.63	2	17,344.00	0.0001841	233	0.1716	241	5,380.02
(K)ENIFLVPLK(H)	100%	48.49	25	48.49	2		536.824	1,071.63	2	25,953.30	0.0004281	233	0.3991	241	4,879.39
(K)ENIFLVPLK(H)	100%	48.3	25	48.3	2		536.8235	1,071.63	2	35,653.00	-0.0005499	233	-0.5127	241	4,811.01
(K)ENIFLVPLK(H)	100%	32.09	25	32.09	2		536.8242	1,071.63	2	19,157.20	0.0007941	233	0.7403	241	5,481.36
(K)ENIFLVPLK(H)	100%	56.2	25	55.36	2		536.8239	1,071.63	2	161998	0.0001841	233	0.1716	241	4,493.33
(K)ENIFLVPLK(H)	100%	31.67	25	31.67	2		536.8242	1,071.63	2	17,605.60	0.0007941	233	0.7403	241	6,299.27
(K)ENIFLVPLK(H)	100%	45.46	25	45.46	2		536.8234	1,071.63	2	20,543.80	-0.0006719	233	-0.6264	241	5,228.39
(K)ENIFLVPLK(H)	100%	34.32	25	34.32	2		536.8242	1,071.63	2	13,605.30	0.0009161	233	0.854	241	6,281.23
(K)ENIFLVPLK(H)	100%	57.29	25	55.94	2		536.8239	1,071.63	2	250009	0.0001841	233	0.1716	241	4,458.01
(K)ENIFLVPLK(H)	100%	27.61	25	27.61	2		536.824	1,071.63	2	13,446.10	0.0005501	233	0.5128	241	5,755.13
(K)ENIFLVPLK(H)	100%	34.04	25	34.04	2		536.8243	1,071.63	2	10,950.70	0.001038	233	0.9678	241	5,945.04
(K)ENIFLVPLK(H)	100%	46.74	25	46.74	2		536.8242	1,071.63	2	18,192.80	0.0009161	233	0.854	241	5,531.90
(K)ENIFLVPLK(H)	100%	54.01	25	53.6	2		536.8237	1,071.63	2	57,894.80	-0.0001839	233	-0.1715	241	4,722.51
(K)ENIFLVPLK(H)	100%	33.61	25	33.61	2		536.8243	1,071.63	2	15,488.70	0.001038	233	0.9678	241	6,247.90
(K)ENIFLVPLK(H)	100%	29.37	25	29.37	2		536.8242	1,071.63	2	17,916.50	0.0007941	233	0.7403	241	6,535.38
(K)ENIFLVPLK(H)	100%	53.06	25	52.62	2		536.824	1,071.63	2	421024	0.0005501	233	0.5128	241	4,423.10
(K)ENIFLVPLK(H)	100%	26.59	25	26.59	2		536.8241	1,071.63	2	15,712.30	0.0006721	233	0.6265	241	5,668.33
(K)ENIFLVPLK(H)	100%	53.01	25	48.33	2		536.8235	1,071.63	2	95,969.50	-0.0005499	233	-0.5127	241	4,559.90
(K)ENIFLVPLK(H)	100%	26.62	25	26.62	2		536.824	1,071.63	2	13,331.60	0.0005501	233	0.5128	241	6,182.44
(K)ENIFLVPLK(H)	100%	31.84	25	31.84	2		536.8242	1,071.63	2	18,452.70	0.0009161	233	0.854	241	6,472.78
(K)ENIFLVPLK(H)	100%	25.92	25	25.92	2		536.8241	1,071.63	2	14,363.40	0.0006721	233	0.6265	241	6,013.11
(K)ENIFLVPLK(H)	100%	38.11	25	33.28	2		536.8244	1,071.63	2	17,454.40	0.001282	233	1.195	241	5,180.29
(K)ENIFLVPLK(H)	100%	52.34	25	52.34	2		536.8236	1,071.63	2	47,657.30	-0.0003059	233	-0.2852	241	4,706.71
(K)ENIFLVPLK(H)	100%	25.99	25	25.99	2		536.824	1,071.63	2	14,620.00	0.0004281	233	0.3991	241	5,806.68
(K)ENIFLVPLK(H)	100%	53.97	25	53.86	2		536.824	1,071.63	2	24,469.90	0.0004281	233	0.3991	241	4,996.61
(K)ENIFLVPLK(H)	100%	24.8	25	24.8	2		536.824	1,071.63	2	14,250.50	0.0005501	233	0.5128	241	5,857.04
(K)ENIFLVPLK(H)	100%	29.46	25	29.46	2		536.8242	1,071.63	2	16,748.80	0.0009161	233	0.854	241	5,737.93
(K)ENIFLVPLK(H)	100%	34.14	25	34.14	2		536.8244	1,071.63	2	19,664.80	0.001282	233	1.195	241	5,600.18
(K)ENIFLVPLK(H)	100%	53.95	25	53.95	2		536.8235	1,071.63	2	34,240.50	-0.0004279	233	-0.399	241	4,844.92
(K)ENIFLVPLK(H)	100%	24.42	25	24.42	2		536.824	1,071.63	2	17,109.70	0.0005501	233	0.5128	241	5,464.63
(K)ENIFLVPLK(H)	100%	25.18	25	25.18	2		536.824	1,071.63	2	15,504.30	0.0004281	233	0.3991	241	6,230.77
(K)ENIFLVPLK(H)	100%	23.7	25	23.7	2		536.8239	1,071.63	2	13,867.90	0.0003061	233	0.2853	241	6,031.00
(K)ENIFLVPLK(H)	100%	25.74	25	25.74	2		536.8242	1,071.63	2	15,651.20	0.0007941	233	0.7403	241	5,720.12
(K)ENIFLVPLK(H)	100%	29.95	25	29.95	2		536.8243	1,071.63	2	14,550.60	0.00116	233	1.081	241	6,150.22
(K)ENIFLVPLK(H)	100%	59.03	25	54.61	2		536.8237	1,071.63	2	336278	-0.0001839	233	-0.1715	241	4,441.48
(K)ENIFLVPLK(H)	100%	23.71	25	23.71	2		536.824	1,071.63	2	16,192.00	0.0004281	233	0.3991	241	5,702.30
(K)ENIFLVPLK(H)	100%	28.96	25	28.96	2		536.8243	1,071.63	2	12,491.00	0.00116	233	1.081	241	6,198.87
(K)ENIFLVPLK(H)	100%	27.41	25	27.41	2		536.8243	1,071.63	2	12,420.30	0.001038	233	0.9678	241	5,962.55
(K)ENIFLVPLK(H)	100%	24.08	25	24.08	2		536.8236	1,071.63	2	15,052.90	-0.0003059	233	-0.2852	241	5,822.60
(K)ENIFLVPLK(H)	100%	26.17	25	26.17	2		536.8234	1,071.63	2	16,340.80	-0.0006719	233	-0.6264	241	5,363.21
(K)ENIFLVPLK(H)	100%	56.56	25	56.48	2		536.8235	1,071.63	2	124978	-0.0004279	233	-0.399	241	4,529.35
(K)ENIFLVPLK(H)	100%	25.97	25	25.97	2		536.8234	1,071.63	2	16,733.00	-0.0006719	233	-0.6264	241	5,414.19
(K)ENIFLVPLK(H)	100%	65.22	25	65.22	2		536.8239	1,071.63	2	21,774.80	0.0001841	233	0.1716	241	5,014.57
(K)ENIFLVPLK(H)	100%	26.09	25	26.09	2		536.8243	1,071.63	2	13,115.10	0.001038	233	0.9678	241	5,789.64
(K)ENIFLVPLK(H)	100%	30.12	25	30.12	2		536.8245	1,071.63	2	13,480.20	0.001526	233	1.423	241	6,047.63
(K)ENIFLVPLK(H)	100%	29.5	25	29.5	2		536.8245	1,071.63	2	17,332.50	0.001526	233	1.423	241	6,413.42
(K)ENIFLVPLK(H)	100%	22.27	25	22.27	2		536.8242	1,071.63	2	17,238.40	0.0007941	233	0.7403	241	6,394.00
(K)ENIFLVPLK(H)	100%	24.97	25	24.97	2		536.8243	1,071.63	2	14,916.90	0.001038	233	0.9678	241	6,096.96
(K)ENIFLVPLK(H)	100%	25.21	25	25.21	2		536.8243	1,071.63	2	13,955.60	0.00116	233	1.081	241	5,841.10
(K)ENIFLVPLK(H)	100%	59.84	25	59.84	2		536.8235	1,071.63	2	19,338.30	-0.0004279	233	-0.399	241	5,145.34
(K)ENIFLVPLK(H)	100%	27.41	25	27.41	2		536.8245	1,071.63	2	14,298.50	0.001526	233	1.423	241	6,063.42
(K)ENIFLVPLK(H)	100%	42.4	25	42.4	2		536.8248	1,071.64	2	21,063.10	0.002136	233	1.991	241	5,260.32
(K)ENIFLVPLK(H)	100%	36.7	25	36.7	2		536.8247	1,071.63	2	12,311.70	0.001892	233	1.764	241	6,116.42
(K)ENIFLVPLK(H)	100%	24.65	25	24.65	2		536.8234	1,071.63	2	12,939.10	-0.0007939	233	-0.7402	241	6,134.39
(K)ENIFLVPLK(H)	100%	24.17	25	24.17	2		536.8244	1,071.63	2	14,514.10	0.001282	233	1.195	241	5,928.50
(K)ENIFLVPLK(H)	100%	30.29	25	30.29	2		536.8248	1,071.64	2	15,181.20	0.002014	233	1.878	241	5,447.28
(K)ENIFLVPLK(H)	100%	70.57	25	70.38	2		536.8235	1,071.63	2	144443	-0.0004279	233	-0.399	241	4,544.60
(K)ENIFLVPLK(H)	100%	27.91	25	27.91	2		536.8232	1,071.63	2	18,270.10	-0.00116	233	-1.081	241	6,436.77
(K)ENIFLVPLK(H)	100%	52.07	25	49.9	2		536.8248	1,071.64	2	15,993.10	0.002014	233	1.878	241	5,329.63
(K)ENIFLVPLK(H)	100%	70.89	25	67.18	2		536.8236	1,071.63	2	138342	-0.0003059	233	-0.2852	241	4,510.80
(K)ENIFLVPLK(H)	100%	44.37	25	37.67	2		536.823	1,071.63	2	19,111.20	-0.001526	233	-1.423	241	5,212.42
(K)ENIFLVPLK(H)	100%	66.17	25	65.47	2		536.8243	1,071.63	2	207652	0.001038	233	0.9678	241	4,475.69
(K)ENIFLVPLK(H)	100%	46.6	25	46.6	2		536.8249	1,071.64	2	24,726.70	0.002258	233	2.105	241	4,946.52
(K)ENIFLVPLK(H)	100%	51.27	25	51.27	2		536.823	1,071.63	2	34,871.10	-0.001526	233	-1.423	241	4,826.26
(K)ENIFLVPLK(H)	100%	32.12	25	32.12	2		536.8251	1,071.64	2	11,187.80	0.002624	233	2.446	241	5,980.30
(K)ENIFLVPLK(H)	100%	28.07	25	25.4	2		536.8229	1,071.63	2	20,227.00	-0.001648	233	-1.536	241	6,592.02
(K)ENIFLVPLK(H)	100%	36.28	25	36.28	2		536.8228	1,071.63	2	16,524.00	-0.001892	233	-1.764	241	5,499.16
(K)ENIFLVPLK(H)	100%	26.16	25	26.16	2		536.823	1,071.63	2	13,867.10	-0.001526	233	-1.423	241	5,634.28
(K)ENIFLVPLK(H)	100%	76.97	25	75.33	2		536.8235	1,071.63	2	1382470	-0.0004279	233	-0.399	241	4,389.31
(K)ENIFLVPLK(H)	100%	77.01	25	72.1	2		536.8234	1,071.63	2	4555050	-0.0007939	233	-0.7402	241	4,373.16
(K)ENIFLVPLK(H)	100%	76.82	25	73.57	2		536.8234	1,071.63	2	4.04E+07	-0.0007939	233	-0.7402	241	4,342.55
(K)ENIFLVPLK(H)	100%	76.78	25	75.99	2		536.8234	1,071.63	2	2.96E+07	-0.0007939	233	-0.7402	241	4,357.74
(K)ENIFLVPLK(H)	100%	65.49	25	65.03	2		536.8229	1,071.63	2	56,416.60	-0.001648	233	-1.536	241	4,689.30
(K)ENIFLVPLK(H)	100%	36.61	25	36.61	2		536.8218	1,071.63	2	84,680.40	-0.003968	233	-3.699	241	4,627.97
(K)ENIFLVPLK(H)	100%	21.76	25	21.76	2		536.8241	1,071.63	2	17,578.40	0.0006721	233	0.6265	241	6,501.48
(K)ENIFLVPLK(H)	100%	22.08	25	22.08	2		536.8235	1,071.63	2	17,993.10	-0.0004279	233	-0.399	241	5,685.40
(K)ENIFLVPLK(H)	100%	20.75	25	20.75	2		536.824	1,071.63	2	15,716.90	0.0004281	233	0.3991	241	5,652.62
(K)ENIFLVPLK(H)	100%	21.2	25	21.2	2		536.8242	1,071.63	2	14,673.20	0.0007941	233	0.7403	241	6,356.07
(K)ENIFLVPLK(H)	100%	22.11	25	22.11	2		536.8243	1,071.63	2	15,796.60	0.00116	233	1.081	241	6,264.71
(K)ENIFLVPLK(H)	100%	20.07	25	20.07	2		536.8234	1,071.63	2	17,832.10	-0.0006719	233	-0.6264	241	6,335.83
(K)ENIFLVPLK(H)	100%	18.15	25	18.15	2		536.8237	1,071.63	2	14,476.60	-0.00006194	233	-0.05775	241	6,080.20
(K)ENIFLVPLK(H)	100%	16.21	25	16.21	2		536.8238	1,071.63	2	16,981.10	0.00006206	233	0.05786	241	6,454.02
(K)ENIFLVPLK(H)	100%	17.85	25	17.85	2		536.824	1,071.63	2	26,667.50	0.0005501	233	0.5128	241	6,576.72
(K)ENIFLVPLK(H)	99%	17.21	25	17.21	2		536.8242	1,071.63	2	25,941.90	0.0007941	233	0.7403	241	6,624.20
(K)ENIFLVPLK(H)	99%	16.03	25	16.03	2		536.8241	1,071.63	2	19,544.70	0.0006721	233	0.6265	241	6,519.08
(K)ENIFLVPLK(H)	99%	15.5	25	15.5	2		536.8242	1,071.63	2	24,271.30	0.0007941	233	0.7403	241	6,866.72
(K)ENIFLVPLK(H)	96%	15.01	25	15.01	2		536.8229	1,071.63	2	23,722.00	-0.001648	233	-1.536	241	6,713.29
(K)ENIFLVPLK(H)	94%	11.88	25	11.88	2		536.8241	1,071.63	2	27,806.60	0.0006721	233	0.6265	241	6,734.45
(K)ENIFLVPLKHLR(D)	100%	40.82	25	39.71	2		493.633	1,477.88	3	101492	0.0001801	233	0.1218	244	3,531.45
(K)ENIFLVPLKHLR(D)	100%	40.63	25	40.63	2		493.6329	1,477.88	3	47,307.10	-0.00009294	233	-0.06285	244	3,547.06
(K)ENIFLVPLKHLR(D)	100%	38.4	25	38.4	2		493.6321	1,477.87	3	211782	-0.002658	233	-1.797	244	3,470.72
(K)ENIFLVPLKHLR(D)	100%	38.48	25	37.46	2		493.6326	1,477.88	3	336859	-0.001194	233	-0.8073	244	3,516.13
(K)ENIFLVPLKHLR(D)	100%	38.36	25	37.22	2		493.6329	1,477.88	3	730843	-0.00009294	233	-0.06285	244	3,485.79
(K)ENIFLVPLKHLR(D)	100%	43.85	25	40.99	2		493.6325	1,477.88	3	812378	-0.001377	233	-0.9311	244	3,500.91
(K)ENIFLVPLKHLR(D)	100%	22.82	25	22.82	2		493.6334	1,477.88	3	47,543.30	0.001278	233	0.8642	244	3,563.71
(K)ENIFLVPLKHLR(D)	100%	24.79	25	24.79	2		493.6342	1,477.88	3	25,867.10	0.003843	233	2.599	244	3,654.85
(K)ENIFLVPLKHLR(D)	99%	17.39	25	17.39	2		493.6329	1,477.88	3	20,021.80	-0.0002759	233	-0.1866	244	3,680.77
(K)ENIFLVPLKHLR(D)	98%	13.71	25	13.71	2		493.633	1,477.88	3	25,679.20	0.0001801	233	0.1218	244	3,636.41
(K)ENIFLVPLKHLR(D)	98%	14.99	25	14.99	2		493.6325	1,477.88	3	54,881.70	-0.001284	233	-0.8682	244	3,579.52
(E)NIFLVPLK(H)	99%	25.06	25	25.06	1		472.3023	942.5901	2	19,712.00	-0.0003079	234	-0.3263	241	4,158.51
(E)NIFLVPLK(H)	99%	24.33	25	24.33	1		472.3025	942.5905	2	19,443.20	0.0001201	234	0.1272	241	4,175.62
(R)DSQFVGELLVGTPPQ(T)	100%	33.23	25	33.23	1		793.9081	1,585.80	2	15,629.70	0.00254	245	1.601	259	5,650.47
(R)DSQFVGELLVGTPPQ(T)	100%	51.33	25	51.33	1		793.9058	1,585.80	2	20,704.10	-0.002098	245	-1.322	259	5,666.89
(R)RYDPNKSK(T)	99%	40.46	25	39.3	2		336.514	1,006.52	3	73,624.60	0.0004331	289	0.4298	296	621.337
(R)RYDPNKSK(T)	99%	40.66	25	40.66	2		336.5141	1,006.52	3	87,731.60	0.0007991	289	0.7931	296	947.167
(R)RYDPNKSK(T)	99%	35.26	25	35.23	2		336.5139	1,006.52	3	76,264.50	0.0002501	289	0.2482	296	728.143
(R)RYDPNKSK(T)	99%	37.28	25	29.04	2		504.2674	1,006.52	2	21,629.10	0.0005681	289	0.5638	296	1,504.20
(R)RYDPNKSK(T)	99%	33.4	25	33.4	2		336.5139	1,006.52	3	71,639.10	0.0002501	289	0.2482	296	1,180.40
(R)RYDPNKSK(T)	99%	33.15	25	33.15	2		336.514	1,006.52	3	84,408.90	0.0004331	289	0.4298	296	1,008.69
(R)RYDPNKSK(T)	99%	32.98	25	32.6	2		336.514	1,006.52	3	66,595.70	0.0005261	289	0.5221	296	1,273.54
(R)RYDPNKSK(T)	99%	35.35	25	27.12	2		504.2672	1,006.52	2	60,613.90	0.0002621	289	0.2601	296	1,366.74
(R)RYDPNKSK(T)	99%	34.08	25	27.91	2		336.5141	1,006.52	3	86,741.10	0.0007091	289	0.7038	296	636.495
(R)RYDPNKSK(T)	99%	32.11	25	30.08	2		336.5139	1,006.52	3	69,472.40	0.0002501	289	0.2482	296	1,211.81
(R)RYDPNKSK(T)	99%	31.33	25	31.33	2		336.514	1,006.52	3	71,100.60	0.0005261	289	0.5221	296	605.857
(R)RYDPNKSK(T)	99%	31.17	25	30.48	2		336.514	1,006.52	3	64,029.70	0.0004331	289	0.4298	296	1,320.19
(R)RYDPNKSK(T)	99%	33.79	25	25.6	2		504.2675	1,006.52	2	70,506.50	0.0006901	289	0.6849	296	1,304.88
(R)RYDPNKSK(T)	99%	30.33	25	30.33	2		336.514	1,006.52	3	76,513.50	0.0006161	289	0.6115	296	712.75
(R)RYDPNKSK(T)	99%	30.86	25	28.84	2		336.514	1,006.52	3	62,462.60	0.0004331	289	0.4298	296	1,242.83
(R)RYDPNKSK(T)	99%	30.25	25	30.25	2		336.514	1,006.52	3	68,499.00	0.0004331	289	0.4298	296	1,117.53
(R)RYDPNKSK(T)	99%	29.59	25	29.59	2		336.5141	1,006.52	3	29,018.60	0.0007991	289	0.7931	296	1,458.85
(R)RYDPNKSK(T)	99%	28.61	25	28.61	2		336.514	1,006.52	3	29,265.00	0.0004331	289	0.4298	296	544.962
(R)RYDPNKSK(T)	99%	29.23	25	26.82	2		336.5141	1,006.52	3	67,203.40	0.0007091	289	0.7038	296	1,164.68
(R)RYDPNKSK(T)	99%	28.51	25	28.19	2		336.5139	1,006.52	3	60,225.40	0.0003431	289	0.3405	296	1,381.91
(R)RYDPNKSK(T)	99%	28.42	25	28.42	2		336.5141	1,006.52	3	75,359.00	0.0007091	289	0.7038	296	590.601
(R)RYDPNKSK(T)	99%	28.33	25	28.33	2		336.514	1,006.52	3	70,674.60	0.0005261	289	0.5221	296	1,226.86
(R)RYDPNKSK(T)	99%	28.53	25	26.52	2		336.5139	1,006.52	3	21,148.10	0.0001571	289	0.1559	296	499.282
(R)RYDPNKSK(T)	99%	27.81	25	27.81	2		336.5141	1,006.52	3	61,753.00	0.0008921	289	0.8854	296	575.199
(R)RYDPNKSK(T)	99%	27.79	25	27.79	2		336.5139	1,006.52	3	67,168.80	0.0002501	289	0.2482	296	1,288.83
(R)RYDPNKSK(T)	99%	27.66	25	27.66	2		336.5141	1,006.52	3	22,022.60	0.0008921	289	0.8854	296	1,535.29
(R)RYDPNKSK(T)	99%	30.34	25	22.09	2		504.2672	1,006.52	2	28,081.90	0.0002621	289	0.2601	296	1,473.93
(R)RYDPNKSK(T)	99%	27.37	25	27.37	2		336.5139	1,006.52	3	25,815.60	0.00006706	289	0.06656	296	1,489.13
(R)RYDPNKSK(T)	99%	27.49	25	26.79	2		336.5139	1,006.52	3	42,081.40	0.0001571	289	0.1559	296	560.045
(R)RYDPNKSK(T)	99%	30.21	25	21.69	2		504.2673	1,006.52	2	35,212.00	0.0003241	289	0.3216	296	1,443.65
(R)RYDPNKSK(T)	99%	27.05	25	27.05	2		336.5141	1,006.52	3	79,931.70	0.0007991	289	0.7931	296	774.004
(R)RYDPNKSK(T)	99%	26.94	25	26.94	2		336.5137	1,006.52	3	42,343.70	-0.0002989	289	-0.2967	296	1,412.89
(R)RYDPNKSK(T)	99%	26.86	25	26.86	2		336.5139	1,006.52	3	90,649.30	0.0001571	289	0.1559	296	884.118
(R)RYDPNKSK(T)	99%	26.75	25	26.75	2		336.5141	1,006.52	3	77,622.30	0.0007091	289	0.7038	296	667.008
(R)RYDPNKSK(T)	99%	26.43	25	26.43	2		336.5142	1,006.52	3	77,599.40	0.0009821	289	0.9747	296	1,086.45
(R)RYDPNKSK(T)	99%	26.28	25	26.28	2		336.514	1,006.52	3	75,288.80	0.0006161	289	0.6115	296	820.877
(R)RYDPNKSK(T)	99%	25.65	25	25.65	2		336.514	1,006.52	3	38,973.40	0.0004331	289	0.4298	296	1,428.18
(R)RYDPNKSK(T)	99%	26.27	25	23.22	2		336.514	1,006.52	3	60,565.30	0.0005261	289	0.5221	296	1,351.56
(R)RYDPNKSK(T)	99%	25.28	25	25.28	2		336.5141	1,006.52	3	73,757.70	0.0008921	289	0.8854	296	758.795
(R)RYDPNKSK(T)	99%	25.23	25	25.23	2		336.514	1,006.52	3	25,046.50	0.0004331	289	0.4298	296	514.449
(R)RYDPNKSK(T)	99%	25.05	25	25.05	2		336.5139	1,006.52	3	30,784.00	0.0002501	289	0.2482	296	529.709
(R)RYDPNKSK(T)	99%	24.94	25	24.94	2		336.5141	1,006.52	3	81,307.30	0.0007091	289	0.7038	296	697.572
(R)RYDPNKSK(T)	99%	24.93	25	24.93	2		336.514	1,006.52	3	71,751.90	0.0004331	289	0.4298	296	1,101.96
(R)RYDPNKSK(T)	99%	24.68	25	24.68	2		336.5141	1,006.52	3	85,527.70	0.0007991	289	0.7931	296	1,039.84
(R)RYDPNKSK(T)	99%	24.5	25	24.5	2		336.5141	1,006.52	3	81,765.30	0.0008921	289	0.8854	296	978.17
(R)RYDPNKSK(T)	99%	24.33	25	24.33	2		336.5142	1,006.52	3	72,746.50	0.001075	289	1.067	296	1,133.25
(R)RYDPNKSK(T)	99%	24.28	25	24.28	2		336.5141	1,006.52	3	22,656.00	0.0008921	289	0.8854	296	1,519.74
(R)RYDPNKSK(T)	99%	24.28	25	24.28	2		336.5141	1,006.52	3	92,501.10	0.0008921	289	0.8854	296	651.741
(R)RYDPNKSK(T)	99%	24.24	25	24.24	2		336.5138	1,006.52	3	86,428.50	-0.00002594	289	-0.02575	296	1,024.32
(R)RYDPNKSK(T)	99%	25.1	25	21.95	2		336.5137	1,006.52	3	71,197.00	-0.0004819	289	-0.4783	296	1,195.92
(R)RYDPNKSK(T)	99%	23.68	25	23.68	2		336.5139	1,006.52	3	70,984.20	0.0001571	289	0.1559	296	1,335.59
(R)RYDPNKSK(T)	99%	23.66	25	23.66	2		336.5138	1,006.52	3	72,729.40	-0.00002594	289	-0.02575	296	1,149.04
(R)RYDPNKSK(T)	99%	23.42	25	23.42	2		336.5142	1,006.52	3	91,423.40	0.001075	289	1.067	296	915.851
(R)RYDPNKSK(T)	99%	22.69	25	22.69	2		336.5139	1,006.52	3	90,062.10	0.00006706	289	0.06656	296	899.91
(R)RYDPNKSK(T)	99%	22.4	25	22.4	2		336.514	1,006.52	3	83,141.50	0.0006161	289	0.6115	296	962.84
(R)RYDPNKSK(T)	99%	27.85	25	19.59	2		504.2671	1,006.52	2	69,122.60	-0.0001039	289	-0.1032	296	1,258.37
(R)RYDPNKSK(T)	99%	26.94	25	20.68	2		504.2675	1,006.52	2	17,540.50	0.0006901	289	0.6849	296	1,550.48
(R)RYDPNKSK(T)	99%	28.61	25	16.15	2		504.2673	1,006.52	2	47,998.80	0.0004461	289	0.4427	296	1,397.51
(R)RYDPNKSK(T)	99%	22.86	25	20.3	2		336.514	1,006.52	3	87,717.00	0.0006161	289	0.6115	296	1,055.07
(R)RYDPNKSK(T)	99%	22.74	25	15.87	2		504.2675	1,006.52	2	14,144.00	0.0007521	289	0.7464	296	1,565.70
(R)RYDPNKSK(T)	99%	21.8	25	21.8	2		336.514	1,006.52	3	91,287.10	0.0005261	289	0.5221	296	931.726
(R)RYDPNKSK(T)	99%	21.71	25	21.71	2		336.5139	1,006.52	3	84,956.60	0.0003431	289	0.3405	296	852.301
(R)RYDPNKSK(T)	99%	21.65	25	21.65	2		336.5139	1,006.52	3	82,739.30	0.0002501	289	0.2482	296	682.447
(R)RYDPNKSK(T)	99%	21.08	25	21.08	2		336.514	1,006.52	3	83,984.60	0.0004331	289	0.4298	296	836.522
(R)RYDPNKSK(T)	99%	20.99	25	20.99	2		336.514	1,006.52	3	75,754.40	0.0004331	289	0.4298	296	743.514
(R)RYDPNKSK(T)	99%	20.93	25	20.93	2		336.5141	1,006.52	3	73,827.30	0.0007991	289	0.7931	296	789.24
(R)RYDPNKSK(T)	99%	20.46	25	20.46	2		336.514	1,006.52	3	82,337.10	0.0005261	289	0.5221	296	993.439
(R)RYDPNKSK(T)	99%	20.26	25	20.26	2		336.5141	1,006.52	3	7,679.22	0.0008921	289	0.8854	296	1,659.01
(R)RYDPNKSK(T)	99%	20.11	25	20.11	2		336.514	1,006.52	3	82,320.10	0.0004331	289	0.4298	296	867.881
(R)RYDPNKSK(T)	99%	20.1	25	20.1	2		336.5144	1,006.52	3	10,592.30	0.001624	289	1.612	296	1,596.90
(R)RYDPNKSK(T)	99%	19.82	25	19.82	2		336.514	1,006.52	3	73,635.10	0.0004331	289	0.4298	296	804.917
(R)RYDPNKSK(T)	99%	19.86	25	16.92	2		336.5141	1,006.52	3	80,628.90	0.0007091	289	0.7038	296	1,070.78
(R)RYDPNKSK(T)	99%	18.89	25	18.89	2		336.5139	1,006.52	3	5,716.58	0.0003431	289	0.3405	296	1,689.86
(R)RYDPNKSK(T)	99%	18.11	25	11.28	2		504.2674	1,006.52	2	11,388.70	0.0005681	289	0.5638	296	1,581.38
(R)RYDPNKSK(T)	99%	15.46	25	15.46	2		336.5142	1,006.52	3	14,444.00	0.0009821	289	0.9747	296	484.16
(R)RYDPNKSK(T)	99%	15.65	25	15.65	2		336.5143	1,006.52	3	6,789.68	0.001258	289	1.249	296	1,674.30
(R)RYDPNKSK(T)	98%	17.73	25	8.31	2		504.2674	1,006.52	2	9,540.01	0.0005081	289	0.5043	296	1,612.41
(R)RYDPNKSK(T)	98%	13.51	25	13.51	2		336.5139	1,006.52	3	5,773.36	0.0001571	289	0.1559	296	1,720.54
(R)RYDPNKSK(T)	95%	12.41	25	12.41	2		336.5139	1,006.52	3	7,755.88	0.0003431	289	0.3405	296	1,643.51
(R)RYDPNKSK(T)	94%	12.73	25	12.52	2		336.5141	1,006.52	3	5,777.34	0.0007991	289	0.7931	296	1,705.36
(R)RYDPNKSKTFR(R)	100%	44.47	25	39.32	2		353.6915	1,410.74	4	82,621.20	-0.0001059	289	-0.07504	299	1,780.96
(R)YDPNKSKTFR(R)	100%	37.25	25	37.25	2		419.2185	1,254.63	3	98,865.30	-0.00199	290	-1.585	299	1,786.54
(K)TFRRSFIEKNLHIVFGSGSISGSVGTDTFmLGK(H)	100%	28.06	25	28.06	2	Oxidation (+16)	721.7824	3,603.88	5	34,074.60	0.02459	297	6.82	329	4,541.96
(R)RSFIEKNLHIVFGSGSISGSVGTDTFmLGK(H)	100%	73.26	25	73.26	2	Oxidation (+16)	800.9163	3,199.64	4	57,567.60	0.002295	300	0.7171	329	4,499.77
(R)RSFIEKNLHIVFGSGSISGSVGTDTFmLGK(H)	100%	62.39	25	62.39	2	Oxidation (+16)	800.9148	3,199.63	4	75,258.30	-0.003809	300	-1.19	329	4,481.67
(R)SFIEKNLHIVFGSGSISGSVGTDTFMLGK(H)	100%	54.55	25	54.55	2		757.8917	3,027.54	4	47,035.50	-0.00007794	301	-0.02574	329	5,172.66
(R)SFIEKNLHIVFGSGSISGSVGTDTFMLGK(H)	100%	68.65	25	68.65	2		757.8923	3,027.54	4	239149	0.002362	301	0.7799	329	5,155.97
(R)SFIEKNLHIVFGSGSISGSVGTDTFmLGK(H)	100%	61.91	25	61.91	2	Oxidation (+16)	761.8912	3,043.54	4	112123	0.002807	301	0.922	329	4,963.44
(R)SFIEKNLHIVFGSGSISGSVGTDTFmLGK(H)	100%	44.04	25	44.04	2	Oxidation (+16)	1,015.52	3,043.53	3	19,098.70	-0.006274	301	-2.061	329	4,985.60
(R)SFIEKNLHIVFGSGSISGSVGTDTFmLGK(H)	100%	80.86	25	80.86	2	Oxidation (+16)	761.8912	3,043.54	4	162189	0.002807	301	0.922	329	4,930.21
(R)SFIEKNLHIVFGSGSISGSVGTDTFMLGK(H)	99%	97.47	25	97.47	2		1,010.19	3,027.53	3	28,790.90	-0.003057	301	-1.009	329	5,139.71
(R)SFIEKNLHIVFGSGSISGSVGTDTFmLGK(H)	99%	103.15	25	103.15	2	Oxidation (+16)	1,015.52	3,043.53	3	340852	-0.002245	301	-0.7374	329	4,945.77
(K)NLHIVFGS(G)	99%	20.6	25	20.6	1		443.7426	885.4707	2	27,070.40	-0.0001919	306	-0.2165	313	3,098.07
(K)NLHIVFGSG(S)	100%	27.1	25	27.1	1		472.2534	942.4923	2	25,875.20	-0.00008594	306	-0.09109	314	3,029.52
(K)NLHIVFGSG(S)	100%	23.02	25	23.02	1		472.2538	942.493	2	21,439.00	0.0005861	306	0.6212	314	3,011.60
(K)NLHIVFGSGS(I)	100%	27.1	25	27.1	1		515.7701	1,029.53	2	26,751.80	0.00124	306	1.203	315	3,003.40
(K)NLHIVFGSGS(I)	99%	15.41	25	15.41	1		515.7697	1,029.52	2	16,003.80	0.0003841	306	0.3727	315	3,020.60
(K)NLHIVFGSGSISG(S)	100%	42.19	25	42.19	1		644.3385	1,286.66	2	25,518.40	0.0004801	306	0.3728	318	3,694.29
(K)NLHIVFGSGSISG(S)	100%	45.08	25	45.08	1		644.3387	1,286.66	2	20,650.70	0.0009681	306	0.7518	318	3,714.84
(K)NLHIVFGSGSISGS(V)	100%	44.93	25	44.93	1		687.8542	1,373.69	2	70,260.90	-0.0001479	306	-0.1076	319	3,672.13
(K)NLHIVFGSGSISGSVG(T)	100%	71.88	25	71.88	1		765.9003	1,529.79	2	33,662.50	0.002238	306	1.462	321	4,044.39
(K)NLHIVFGSGSISGSVGTD(T)	100%	53.68	25	53.68	1		873.9377	1,745.86	2	17,941.70	0.002366	306	1.354	323	4,191.45
(K)NLHIVFGSGSISGSVGTD(T)	100%	65.32	25	65.32	1		873.9376	1,745.86	2	19,091.10	0.002	306	1.145	323	4,152.04
(K)NLHIVFGSGSISGSVGTD(T)	99%	105.85	25	105.85	1		873.9376	1,745.86	2	32,378.40	0.002	306	1.145	323	4,169.39
(K)NLHIVFGSGSISGSVGTDTF(M)	100%	66.48	25	66.48	1		997.9941	1,993.97	2	55,726.90	-0.0009399	306	-0.4712	325	4,965.53
(K)NLHIVFGSGSISGSVGTDTF(M)	100%	48.84	25	48.84	1		997.9973	1,993.98	2	18,823.90	0.005284	306	2.649	325	4,985.39
(K)NLHIVFGSGSISGSVGTDTF(M)	100%	72.78	25	72.78	1		997.9933	1,993.97	2	91,849.00	-0.00265	306	-1.328	325	4,947.47
(K)NLHIVFGSGSISGSVGTDTF(M)	97%	13.57	25	13.57	1		997.9943	1,993.97	2	8,848.02	-0.0006959	306	-0.3488	325	5,009.50
(K)NLHIVFGSGSISGSVGTDTFMLGK(H)	100%	41.74	25	36.57	2		808.7473	2,423.22	3	9,081.70	0.004344	306	1.792	329	6,970.96
(K)NLHIVFGSGSISGSVGTDTFMLGK(H)	100%	42	25	42	2		808.741	2,423.20	3	29,016.40	-0.0147	306	-6.063	329	4,892.07
(K)NLHIVFGSGSISGSVGTDTFmLGK(H)	100%	36.46	25	36.46	2	Oxidation (+16)	814.0771	2,439.21	3	501738	-0.001069	306	-0.4381	329	5,119.63
(K)NLHIVFGSGSISGSVGTDTFMLGK(H)	100%	36.78	25	36.78	2		808.7465	2,423.22	3	4,258.52	0.001782	306	0.7351	329	7,393.33
(K)NLHIVFGSGSISGSVGTDTFmLGK(H)	100%	45.2	25	45.2	2	Oxidation (+16)	814.0771	2,439.21	3	10,672.10	-0.001252	306	-0.513	329	7,359.30
(K)NLHIVFGSGSISGSVGTDTFmLGK(H)	100%	48.62	25	48.62	2	Oxidation (+16)	814.0781	2,439.21	3	24,612.20	0.001679	306	0.6881	329	4,533.99
(K)NLHIVFGSGSISGSVGTDTFmLGK(H)	100%	64.58	25	64.58	2	Oxidation (+16)	814.0776	2,439.21	3	7,383.56	0.000215	306	0.08813	329	7,390.62
(K)NLHIVFGSGSISGSVGTDTFmLGK(H)	100%	65.31	25	65.31	2	Oxidation (+16)	814.0776	2,439.21	3	68,666.30	0.000215	306	0.08813	329	5,530.51
(K)NLHIVFGSGSISGSVGTDTFMLGK(H)	100%	56.62	25	56.62	2		808.7461	2,423.22	3	11,840.20	0.0006841	306	0.2822	329	7,318.07
(K)NLHIVFGSGSISGSVGTDTFmLGK(H)	100%	67.62	25	67.62	2	Oxidation (+16)	814.0776	2,439.21	3	36,063.20	0.000215	306	0.08813	329	5,905.01
(K)NLHIVFGSGSISGSVGTDTFmLGK(H)	100%	69.65	25	69.65	2	Oxidation (+16)	814.0776	2,439.21	3	101019	0.000215	306	0.08813	329	5,235.32
(K)NLHIVFGSGSISGSVGTDTFmLGK(H)	100%	70.51	25	70.51	2	Oxidation (+16)	814.0776	2,439.21	3	102453	0.000215	306	0.08813	329	5,315.27
(K)NLHIVFGSGSISGSVGTDTFmLGK(H)	100%	56.99	25	56.99	2	Oxidation (+16)	814.0771	2,439.21	3	40,336.90	-0.001069	306	-0.4381	329	4,131.02
(K)NLHIVFGSGSISGSVGTDTFMLGK(H)	100%	25.6	25	25.6	2		808.7454	2,423.21	3	20,034.40	-0.001515	306	-0.6249	329	4,321.94
(K)NLHIVFGSGSISGSVGTDTFmLGK(H)	100%	59.5	25	59.5	2	Oxidation (+16)	814.0779	2,439.21	3	18,781.20	0.001313	306	0.5381	329	6,888.57
(K)NLHIVFGSGSISGSVGTDTFMLGK(H)	100%	67.87	25	67.87	2		808.746	2,423.22	3	62,143.80	0.0005011	306	0.2067	329	5,455.34
(K)NLHIVFGSGSISGSVGTDTFMLGK(H)	100%	63.31	25	63.31	2		808.7459	2,423.22	3	21,513.20	-0.00004794	306	-0.01978	329	6,049.78
(K)NLHIVFGSGSISGSVGTDTFMLGK(H)	100%	56.33	25	56.33	2		808.7466	2,423.22	3	13,380.20	0.002331	306	0.9616	329	6,809.58
(K)NLHIVFGSGSISGSVGTDTFmLGK(H)	100%	52.71	25	52.71	2	Oxidation (+16)	814.0768	2,439.21	3	46,014.90	-0.002167	306	-0.888	329	4,037.32
(K)NLHIVFGSGSISGSVGTDTFMLGK(H)	100%	44.82	25	44.82	2		808.7475	2,423.22	3	26,642.90	0.004896	306	2.02	329	4,163.73
(K)NLHIVFGSGSISGSVGTDTFmLGK(H)	100%	66.33	25	66.33	2	Oxidation (+16)	814.0778	2,439.21	3	44,006.40	0.000764	306	0.3131	329	6,433.45
(K)NLHIVFGSGSISGSVGTDTFmLGK(H)	100%	71.73	25	71.73	2	Oxidation (+16)	814.0775	2,439.21	3	70,247.40	-0.000151	306	-0.06186	329	5,660.61
(K)NLHIVFGSGSISGSVGTDTFMLGK(H)	100%	66.16	25	66.16	2		808.7464	2,423.22	3	15,510.50	0.001599	306	0.6596	329	6,639.96
(K)NLHIVFGSGSISGSVGTDTFmLGK(H)	100%	67.98	25	67.98	2	Oxidation (+16)	814.0777	2,439.21	3	31,152.40	0.000581	306	0.2381	329	6,639.61
(K)NLHIVFGSGSISGSVGTDTFmLGK(H)	100%	68.25	25	68.25	2	Oxidation (+16)	814.0777	2,439.21	3	147071	0.000581	306	0.2381	329	5,152.04
(K)NLHIVFGSGSISGSVGTDTFmLGK(H)	100%	71.57	25	71.57	2	Oxidation (+16)	814.0775	2,439.21	3	143159	0.00003205	306	0.01313	329	5,168.87
(K)NLHIVFGSGSISGSVGTDTFMLGK(H)	100%	68.48	25	68.48	2		808.7462	2,423.22	3	17,086.10	0.00105	306	0.4332	329	6,778.19
(K)NLHIVFGSGSISGSVGTDTFMLGK(H)	100%	54.03	25	54.03	2		808.7471	2,423.22	3	9,668.17	0.003612	306	1.49	329	6,923.18
(K)NLHIVFGSGSISGSVGTDTFMLGK(H)	100%	61.52	25	61.52	2		808.7466	2,423.22	3	12,616.80	0.002331	306	0.9616	329	6,824.88
(K)NLHIVFGSGSISGSVGTDTFmLGK(H)	100%	68.53	25	68.53	2	Oxidation (+16)	814.0773	2,439.21	3	202885	-0.000517	306	-0.2118	329	5,103.39
(K)NLHIVFGSGSISGSVGTDTFmLGK(H)	100%	59.35	25	59.35	2	Oxidation (+16)	814.077	2,439.21	3	12,556.10	-0.001618	306	-0.663	329	7,344.04
(K)NLHIVFGSGSISGSVGTDTFMLGK(H)	100%	72.45	25	72.45	2		808.7464	2,423.22	3	14,134.80	0.001599	306	0.6596	329	6,690.88
(K)NLHIVFGSGSISGSVGTDTFmLGK(H)	100%	71.93	25	71.93	2	Oxidation (+16)	814.0778	2,439.21	3	177169	0.000947	306	0.3881	329	5,087.77
(K)NLHIVFGSGSISGSVGTDTFmLGK(H)	100%	72.94	25	72.94	2	Oxidation (+16)	814.078	2,439.21	3	71,992.30	0.001496	306	0.6131	329	7,297.11
(K)NLHIVFGSGSISGSVGTDTFMLGK(H)	100%	69.86	25	69.83	2		808.7465	2,423.22	3	15,851.30	0.001965	306	0.8106	329	6,746.71
(K)NLHIVFGSGSISGSVGTDTFMLGK(H)	100%	66.65	25	66.65	2		808.7467	2,423.22	3	12,474.60	0.002514	306	1.037	329	6,899.05
(K)NLHIVFGSGSISGSVGTDTFmLGK(H)	100%	62.65	25	62.65	2	Oxidation (+16)	814.0768	2,439.21	3	19,894.30	-0.001984	306	-0.813	329	6,827.07
(K)NLHIVFGSGSISGSVGTDTFMLGK(H)	100%	74.33	25	74.33	2		808.7457	2,423.22	3	90,985.40	-0.0004139	306	-0.1708	329	5,254.47
(K)NLHIVFGSGSISGSVGTDTFMLGK(H)	100%	62.72	25	62.72	2		808.7469	2,423.22	3	13,007.10	0.003246	306	1.339	329	6,762.62
(K)NLHIVFGSGSISGSVGTDTFmLGK(H)	100%	65.45	25	65.45	2	Oxidation (+16)	814.0768	2,439.21	3	38,038.70	-0.002167	306	-0.888	329	3,918.62
(K)NLHIVFGSGSISGSVGTDTFMLGK(H)	100%	67.12	25	67.12	2		808.747	2,423.22	3	17,392.70	0.003429	306	1.414	329	5,964.83
(K)NLHIVFGSGSISGSVGTDTFMLGK(H)	100%	66.29	25	66.29	2		808.7452	2,423.21	3	12,873.10	-0.002064	306	-0.8514	329	6,844.68
(K)NLHIVFGSGSISGSVGTDTFMLGK(H)	100%	71.51	25	71.19	2		808.7468	2,423.22	3	25,835.70	0.002697	306	1.113	329	5,932.10
(K)NLHIVFGSGSISGSVGTDTFMLGK(H)	100%	77.37	25	77.37	2		808.7459	2,423.22	3	28,513.60	-0.00004794	306	-0.01978	329	6,436.41
(K)NLHIVFGSGSISGSVGTDTFMLGK(H)	100%	75.93	25	75.93	2		808.7462	2,423.22	3	23,126.50	0.0008671	306	0.3577	329	6,163.95
(K)NLHIVFGSGSISGSVGTDTFMLGK(H)	100%	76.23	25	75.85	2		808.7463	2,423.22	3	26,951.10	0.001416	306	0.5841	329	5,833.46
(K)NLHIVFGSGSISGSVGTDTFmLGK(H)	100%	75.04	25	75.04	2	Oxidation (+16)	814.0778	2,439.21	3	35,730.80	0.000947	306	0.3881	329	6,529.34
(K)NLHIVFGSGSISGSVGTDTFmLGK(H)	100%	79.3	25	79.3	2	Oxidation (+16)	814.0776	2,439.21	3	32,509.30	0.000398	306	0.1631	329	6,497.98
(K)NLHIVFGSGSISGSVGTDTFMLGK(H)	100%	81.51	25	81.13	2		808.746	2,423.22	3	27,384.10	0.0003181	306	0.1312	329	6,262.10
(K)NLHIVFGSGSISGSVGTDTFmLGK(H)	100%	59.09	25	59.09	2	Oxidation (+16)	814.0789	2,439.21	3	216845	0.004241	306	1.738	329	5,135.38
(K)NLHIVFGSGSISGSVGTDTFmLGK(H)	100%	76.64	25	76.64	2	Oxidation (+16)	814.0778	2,439.21	3	120154	0.000764	306	0.3131	329	5,283.07
(K)NLHIVFGSGSISGSVGTDTFmLGK(H)	100%	79.75	25	79.75	2	Oxidation (+16)	814.0776	2,439.21	3	9,018.65	0.000398	306	0.1631	329	7,375.32
(K)NLHIVFGSGSISGSVGTDTFmLGK(H)	100%	75.64	25	75.64	2	Oxidation (+16)	814.0771	2,439.21	3	87,579.00	-0.001252	306	-0.513	329	5,434.25
(K)NLHIVFGSGSISGSVGTDTFmLGK(H)	100%	73.35	25	73.35	2	Oxidation (+16)	814.0782	2,439.21	3	43,919.10	0.002228	306	0.9131	329	6,125.09
(K)NLHIVFGSGSISGSVGTDTFmLGK(H)	100%	28.97	25	28.97	2	Oxidation (+16)	814.0793	2,439.22	3	4,196.88	0.005525	306	2.264	329	7,422.05
(K)NLHIVFGSGSISGSVGTDTFMLGK(H)	100%	76.92	25	76.92	2		808.7464	2,423.22	3	28,012.30	0.001599	306	0.6596	329	6,280.89
(K)NLHIVFGSGSISGSVGTDTFMLGK(H)	100%	72.97	25	72.97	2		808.7468	2,423.22	3	23,590.20	0.002697	306	1.113	329	6,017.37
(K)NLHIVFGSGSISGSVGTDTFmLGK(H)	100%	76.98	25	76.98	2	Oxidation (+16)	814.078	2,439.21	3	101193	0.001496	306	0.6131	329	5,347.01
(K)NLHIVFGSGSISGSVGTDTFMLGK(H)	100%	76.43	25	76.43	2		808.7456	2,423.22	3	11,524.20	-0.0007829	306	-0.323	329	6,860.77
(K)NLHIVFGSGSISGSVGTDTFmLGK(H)	100%	73.98	25	73.98	2	Oxidation (+16)	814.0782	2,439.21	3	37,025.90	0.002045	306	0.8381	329	6,092.79
(K)NLHIVFGSGSISGSVGTDTFMLGK(H)	100%	67.32	25	65.69	2		808.7472	2,423.22	3	28,287.50	0.003978	306	1.641	329	7,301.87
(K)NLHIVFGSGSISGSVGTDTFMLGK(H)	100%	76.24	25	76.13	2		808.7455	2,423.21	3	47,388.40	-0.0009659	306	-0.3985	329	5,728.42
(K)NLHIVFGSGSISGSVGTDTFmLGK(H)	100%	79.5	25	79.5	2	Oxidation (+16)	814.0775	2,439.21	3	73,322.30	0.00003205	306	0.01313	329	5,514.91
(K)NLHIVFGSGSISGSVGTDTFMLGK(H)	100%	76.5	25	76.5	2		808.7455	2,423.21	3	24,008.60	-0.0009659	306	-0.3985	329	6,212.17
(K)NLHIVFGSGSISGSVGTDTFmLGK(H)	100%	77.78	25	77.78	2	Oxidation (+16)	814.0777	2,439.21	3	135778	0.000581	306	0.2381	329	5,201.90
(K)NLHIVFGSGSISGSVGTDTFMLGK(H)	100%	72.56	25	72.56	2		808.7452	2,423.21	3	16,110.70	-0.001881	306	-0.7759	329	6,793.44
(K)NLHIVFGSGSISGSVGTDTFMLGK(H)	100%	76.71	25	76.71	2		808.7455	2,423.21	3	53,722.80	-0.001149	306	-0.4739	329	7,285.12
(K)NLHIVFGSGSISGSVGTDTFmLGK(H)	100%	77.93	25	77.93	2	Oxidation (+16)	814.0777	2,439.21	3	111422	0.000581	306	0.2381	329	5,300.16
(K)NLHIVFGSGSISGSVGTDTFmLGK(H)	100%	49.14	25	49.14	2	Oxidation (+16)	814.0759	2,439.21	3	70,102.50	-0.004912	306	-2.013	329	4,112.43
(K)NLHIVFGSGSISGSVGTDTFmLGK(H)	100%	78.53	25	78.53	2	Oxidation (+16)	814.0777	2,439.21	3	47,671.80	0.000581	306	0.2381	329	6,256.84
(K)NLHIVFGSGSISGSVGTDTFMLGK(H)	100%	79.11	25	78.89	2		808.7462	2,423.22	3	21,179.60	0.0008671	306	0.3577	329	6,490.11
(K)NLHIVFGSGSISGSVGTDTFMLGK(H)	100%	79.34	25	79.34	2		808.7463	2,423.22	3	32,666.70	0.001416	306	0.5841	329	5,746.27
(K)NLHIVFGSGSISGSVGTDTFmLGK(H)	100%	46.95	25	46.95	2	Oxidation (+16)	814.0798	2,439.22	3	5,294.10	0.006989	306	2.864	329	7,406.45
(K)NLHIVFGSGSISGSVGTDTFMLGK(H)	100%	66.49	25	66.49	2		808.745	2,423.21	3	16,350.90	-0.002613	306	-1.078	329	6,555.88
(K)NLHIVFGSGSISGSVGTDTFmLGK(H)	100%	75.5	25	75.5	2	Oxidation (+16)	814.0782	2,439.21	3	46,496.20	0.002228	306	0.9131	329	5,977.31
(K)NLHIVFGSGSISGSVGTDTFmLGK(H)	100%	74	25	74	2	Oxidation (+16)	814.0784	2,439.21	3	18,427.50	0.002777	306	1.138	329	6,903.71
(K)NLHIVFGSGSISGSVGTDTFMLGK(H)	100%	83.65	25	83.65	2		808.746	2,423.22	3	18,905.60	0.0003181	306	0.1312	329	6,623.98
(K)NLHIVFGSGSISGSVGTDTFmLGK(H)	100%	77.8	25	77.8	2	Oxidation (+16)	814.0781	2,439.21	3	41,883.30	0.001862	306	0.7631	329	6,175.29
(K)NLHIVFGSGSISGSVGTDTFmLGK(H)	100%	67.09	25	67.09	2	Oxidation (+16)	814.0792	2,439.22	3	117269	0.004976	306	2.039	329	5,331.26
(K)NLHIVFGSGSISGSVGTDTFMLGK(H)	100%	79.94	25	79.94	2		808.7461	2,423.22	3	29,928.70	0.0006841	306	0.2822	329	6,297.46
(K)NLHIVFGSGSISGSVGTDTFMLGK(H)	100%	79.8	25	79.8	2		808.7464	2,423.22	3	21,201.00	0.001599	306	0.6596	329	6,521.44
(K)NLHIVFGSGSISGSVGTDTFmLGK(H)	100%	73.81	25	73.81	2	Oxidation (+16)	814.0787	2,439.21	3	41,130.80	0.003509	306	1.438	329	5,942.22
(K)NLHIVFGSGSISGSVGTDTFMLGK(H)	100%	80.88	25	80.54	2		808.7457	2,423.22	3	41,570.20	-0.0004139	306	-0.1708	329	5,657.72
(K)NLHIVFGSGSISGSVGTDTFMLGK(H)	100%	80.42	25	80.18	2		808.7461	2,423.22	3	45,090.10	0.0006841	306	0.2822	329	5,521.67
(K)NLHIVFGSGSISGSVGTDTFMLGK(H)	100%	76.84	25	76.84	2		808.7465	2,423.22	3	23,785.30	0.001965	306	0.8106	329	5,851.27
(K)NLHIVFGSGSISGSVGTDTFMLGK(H)	100%	80.48	25	80.48	2		808.7461	2,423.22	3	25,258.20	0.0006841	306	0.2822	329	5,675.73
(K)NLHIVFGSGSISGSVGTDTFmLGK(H)	100%	69.26	25	69.26	2	Oxidation (+16)	814.0791	2,439.22	3	17,038.30	0.004793	306	1.964	329	7,012.31
(K)NLHIVFGSGSISGSVGTDTFmLGK(H)	100%	74.82	25	74.82	2	Oxidation (+16)	814.0768	2,439.21	3	19,285.40	-0.001984	306	-0.813	329	6,872.46
(K)NLHIVFGSGSISGSVGTDTFmLGK(H)	100%	77.12	25	77.12	2	Oxidation (+16)	814.0782	2,439.21	3	96,088.20	0.002045	306	0.8381	329	5,362.99
(K)NLHIVFGSGSISGSVGTDTFmLGK(H)	100%	80.15	25	80.15	2	Oxidation (+16)	814.0773	2,439.21	3	4.36E+07	-0.0007	306	-0.2868	329	4,690.12
(K)NLHIVFGSGSISGSVGTDTFmLGK(H)	100%	83.12	25	83.12	2	Oxidation (+16)	814.0775	2,439.21	3	32,372.90	-0.000151	306	-0.06186	329	6,593.72
(K)NLHIVFGSGSISGSVGTDTFmLGK(H)	100%	80.87	25	80.87	2	Oxidation (+16)	814.0779	2,439.21	3	46,588.10	0.00113	306	0.4631	329	6,028.36
(K)NLHIVFGSGSISGSVGTDTFmLGK(H)	100%	81.24	25	81.24	2	Oxidation (+16)	814.0781	2,439.21	3	51,528.80	0.001679	306	0.6881	329	5,866.17
(K)NLHIVFGSGSISGSVGTDTFmLGK(H)	100%	81.26	25	81.26	2	Oxidation (+16)	814.078	2,439.21	3	46,906.10	0.001496	306	0.6131	329	6,345.92
(K)NLHIVFGSGSISGSVGTDTFmLGK(H)	100%	81.79	25	81.79	2	Oxidation (+16)	814.0778	2,439.21	3	44,138.10	0.000764	306	0.3131	329	5,994.65
(K)NLHIVFGSGSISGSVGTDTFMLGK(H)	100%	80.44	25	80.15	2		808.7455	2,423.21	3	92,445.40	-0.0009659	306	-0.3985	329	5,271.25
(K)NLHIVFGSGSISGSVGTDTFmLGK(H)	100%	82.38	25	82.38	2	Oxidation (+16)	814.0774	2,439.21	3	72,140.70	-0.000334	306	-0.1369	329	5,582.08
(K)NLHIVFGSGSISGSVGTDTFmLGK(H)	100%	75.14	25	75.14	2	Oxidation (+16)	814.0786	2,439.21	3	45,279.40	0.003326	306	1.363	329	6,241.42
(K)NLHIVFGSGSISGSVGTDTFMLGK(H)	100%	80.99	25	80.99	2		808.7462	2,423.22	3	15,097.50	0.00105	306	0.4332	329	6,655.27
(K)NLHIVFGSGSISGSVGTDTFmLGK(H)	100%	58.32	25	58.32	2	Oxidation (+16)	814.0792	2,439.22	3	47,311.10	0.005159	306	2.114	329	6,327.73
(K)NLHIVFGSGSISGSVGTDTFmLGK(H)	100%	80.3	25	80.3	2	Oxidation (+16)	814.0773	2,439.21	3	88,807.30	-0.000517	306	-0.2118	329	5,467.29
(K)NLHIVFGSGSISGSVGTDTFmLGK(H)	100%	80.32	25	80.32	2	Oxidation (+16)	814.0781	2,439.21	3	69,517.10	0.001862	306	0.7631	329	5,644.36
(K)NLHIVFGSGSISGSVGTDTFmLGK(H)	100%	81.58	25	81.58	2	Oxidation (+16)	814.0773	2,439.21	3	21,426.30	-0.0007	306	-0.2868	329	6,716.93
(K)NLHIVFGSGSISGSVGTDTFmLGK(H)	100%	81.43	25	81.43	2	Oxidation (+16)	814.0778	2,439.21	3	19,985.90	0.000947	306	0.3881	329	6,842.07
(K)NLHIVFGSGSISGSVGTDTFmLGK(H)	100%	82.41	25	82.41	2	Oxidation (+16)	814.078	2,439.21	3	37,739.10	0.001496	306	0.6131	329	6,514.21
(K)NLHIVFGSGSISGSVGTDTFmLGK(H)	100%	76.59	25	76.59	2	Oxidation (+16)	814.0785	2,439.21	3	44,189.20	0.00296	306	1.213	329	6,044.64
(K)NLHIVFGSGSISGSVGTDTFmLGK(H)	100%	76.71	25	76.71	2	Oxidation (+16)	814.0785	2,439.21	3	81,693.40	0.00296	306	1.213	329	5,499.28
(K)NLHIVFGSGSISGSVGTDTFmLGK(H)	100%	82.08	25	82.08	2	Oxidation (+16)	814.0773	2,439.21	3	40,696.20	-0.0007	306	-0.2868	329	6,380.11
(K)NLHIVFGSGSISGSVGTDTFMLGK(H)	100%	82.76	25	82.76	2		808.7461	2,423.22	3	29,088.40	0.0006841	306	0.2822	329	5,815.57
(K)NLHIVFGSGSISGSVGTDTFMLGK(H)	100%	84.2	25	84.2	2		808.7458	2,423.22	3	115742	-0.0002309	306	-0.09526	329	5,174.42
(K)NLHIVFGSGSISGSVGTDTFmLGK(H)	100%	82.47	25	82.47	2	Oxidation (+16)	814.0778	2,439.21	3	490117	0.000947	306	0.3881	329	4,906.56
(K)NLHIVFGSGSISGSVGTDTFmLGK(H)	100%	79.73	25	79.73	2	Oxidation (+16)	814.0782	2,439.21	3	44,276.00	0.002228	306	0.9131	329	5,922.93
(K)NLHIVFGSGSISGSVGTDTFMLGK(H)	100%	72.99	25	72.59	2		808.7475	2,423.22	3	29,626.50	0.004896	306	2.02	329	6,402.98
(K)NLHIVFGSGSISGSVGTDTFmLGK(H)	100%	77.25	25	77.25	2	Oxidation (+16)	814.0786	2,439.21	3	46,456.60	0.003143	306	1.288	329	6,363.20
(K)NLHIVFGSGSISGSVGTDTFmLGK(H)	100%	84.22	25	84.22	2	Oxidation (+16)	814.0775	2,439.21	3	122516	0.00003205	306	0.01313	329	5,218.58
(K)NLHIVFGSGSISGSVGTDTFmLGK(H)	100%	83.53	25	83.53	2	Oxidation (+16)	814.0774	2,439.21	3	65,181.70	-0.000334	306	-0.1369	329	5,677.32
(K)NLHIVFGSGSISGSVGTDTFmLGK(H)	100%	82.86	25	82.86	2	Oxidation (+16)	814.0778	2,439.21	3	471061	0.000947	306	0.3881	329	4,888.91
(K)NLHIVFGSGSISGSVGTDTFmLGK(H)	100%	79.51	25	79.51	2	Oxidation (+16)	814.0784	2,439.21	3	99,666.40	0.002594	306	1.063	329	5,398.09
(K)NLHIVFGSGSISGSVGTDTFmLGK(H)	100%	77.45	25	77.45	2	Oxidation (+16)	814.0786	2,439.21	3	44,815.10	0.003143	306	1.288	329	6,291.05
(K)NLHIVFGSGSISGSVGTDTFmLGK(H)	100%	68.15	25	68.15	2	Oxidation (+16)	814.0761	2,439.21	3	10,454.10	-0.00418	306	-1.713	329	6,966.34
(K)NLHIVFGSGSISGSVGTDTFmLGK(H)	100%	80.89	25	80.89	2	Oxidation (+16)	814.0782	2,439.21	3	57,809.00	0.002228	306	0.9131	329	5,728.29
(K)NLHIVFGSGSISGSVGTDTFmLGK(H)	100%	78.16	25	78.16	2	Oxidation (+16)	814.0786	2,439.21	3	36,990.10	0.003326	306	1.363	329	6,190.46
(K)NLHIVFGSGSISGSVGTDTFmLGK(H)	100%	79	25	79	2	Oxidation (+16)	814.0768	2,439.21	3	18,690.40	-0.001984	306	-0.813	329	6,732.10
(K)NLHIVFGSGSISGSVGTDTFMLGK(H)	100%	81.91	25	81.91	2		808.7454	2,423.21	3	32,594.20	-0.001332	306	-0.5494	329	5,781.70
(K)NLHIVFGSGSISGSVGTDTFmLGK(H)	100%	27.65	25	27.65	2	Oxidation (+16)	814.0804	2,439.22	3	3,755.40	0.008636	306	3.539	329	7,455.13
(K)NLHIVFGSGSISGSVGTDTFMLGK(H)	100%	81.32	25	81.32	2		808.7466	2,423.22	3	16,242.20	0.002331	306	0.9616	329	6,590.47
(K)NLHIVFGSGSISGSVGTDTFMLGK(H)	100%	83.07	25	82.72	2		808.7457	2,423.22	3	21,481.60	-0.0005969	306	-0.2462	329	6,470.07
(K)NLHIVFGSGSISGSVGTDTFMLGK(H)	100%	83.12	25	83.12	2		808.7457	2,423.22	3	1.86E+07	-0.0005969	306	-0.2462	329	4,934.35
(K)NLHIVFGSGSISGSVGTDTFmLGK(H)	100%	85.71	25	85.71	2	Oxidation (+16)	814.0775	2,439.21	3	477748	-0.000151	306	-0.06186	329	4,852.80
(K)NLHIVFGSGSISGSVGTDTFmLGK(H)	100%	84.2	25	84.2	2	Oxidation (+16)	814.078	2,439.21	3	42,542.50	0.001496	306	0.6131	329	6,466.18
(K)NLHIVFGSGSISGSVGTDTFmLGK(H)	100%	84.49	25	84.49	2	Oxidation (+16)	814.0779	2,439.21	3	28,327.20	0.001313	306	0.5381	329	7,313.21
(K)NLHIVFGSGSISGSVGTDTFmLGK(H)	100%	84.65	25	84.65	2	Oxidation (+16)	814.0774	2,439.21	3	28,497.80	-0.000334	306	-0.1369	329	6,763.76
(K)NLHIVFGSGSISGSVGTDTFMLGK(H)	100%	83.06	25	82.64	2		808.7454	2,423.21	3	37,378.00	-0.001332	306	-0.5494	329	5,638.72
(K)NLHIVFGSGSISGSVGTDTFmLGK(H)	100%	84.99	25	84.99	2	Oxidation (+16)	814.0774	2,439.21	3	78,304.50	-0.000334	306	-0.1369	329	5,415.55
(K)NLHIVFGSGSISGSVGTDTFmLGK(H)	100%	84.41	25	84.41	2	Oxidation (+16)	814.0772	2,439.21	3	292339	-0.000886	306	-0.3631	329	4,955.04
(K)NLHIVFGSGSISGSVGTDTFmLGK(H)	100%	84.41	25	84.41	2	Oxidation (+16)	814.0773	2,439.21	3	98,603.20	-0.0007	306	-0.2868	329	5,379.67
(K)NLHIVFGSGSISGSVGTDTFmLGK(H)	100%	80.44	25	80.44	2	Oxidation (+16)	814.0787	2,439.21	3	42,661.10	0.003509	306	1.438	329	6,141.46
(K)NLHIVFGSGSISGSVGTDTFMLGK(H)	100%	83.23	25	83.23	2		808.7454	2,423.21	3	48,260.60	-0.001332	306	-0.5494	329	5,489.56
(K)NLHIVFGSGSISGSVGTDTFmLGK(H)	100%	84.88	25	84.88	2	Oxidation (+16)	814.078	2,439.21	3	86,686.90	0.001496	306	0.6131	329	5,483.51
(K)NLHIVFGSGSISGSVGTDTFMLGK(H)	100%	81.76	25	81.76	2		808.7469	2,423.22	3	23,388.00	0.003063	306	1.264	329	6,368.12
(K)NLHIVFGSGSISGSVGTDTFMLGK(H)	100%	86.25	25	86.25	2		808.7459	2,423.22	3	95,353.20	0.0001351	306	0.05571	329	5,221.91
(K)NLHIVFGSGSISGSVGTDTFmLGK(H)	100%	84.22	25	84.22	2	Oxidation (+16)	814.0773	2,439.21	3	412705	-0.000517	306	-0.2118	329	4,924.10
(K)NLHIVFGSGSISGSVGTDTFmLGK(H)	100%	85.3	25	85.3	2	Oxidation (+16)	814.0777	2,439.21	3	229713	0.000581	306	0.2381	329	4,989.79
(K)NLHIVFGSGSISGSVGTDTFmLGK(H)	100%	85.13	25	85.13	2	Oxidation (+16)	814.0772	2,439.21	3	1.48E+07	-0.000886	306	-0.3631	329	4,705.58
(K)NLHIVFGSGSISGSVGTDTFmLGK(H)	100%	82.51	25	82.51	2	Oxidation (+16)	814.0784	2,439.21	3	36,889.40	0.002777	306	1.138	329	6,561.41
(K)NLHIVFGSGSISGSVGTDTFmLGK(H)	100%	84.53	25	84.53	2	Oxidation (+16)	814.0781	2,439.21	3	42,976.00	0.001862	306	0.7631	329	5,961.19
(K)NLHIVFGSGSISGSVGTDTFmLGK(H)	100%	81.85	25	81.85	2	Oxidation (+16)	814.0786	2,439.21	3	24,305.30	0.003143	306	1.288	329	6,685.52
(K)NLHIVFGSGSISGSVGTDTFmLGK(H)	100%	81.57	25	81.57	2	Oxidation (+16)	814.0767	2,439.21	3	21,337.00	-0.00235	306	-0.963	329	6,794.22
(K)NLHIVFGSGSISGSVGTDTFmLGK(H)	100%	71.7	25	71.7	2	Oxidation (+16)	814.0794	2,439.22	3	144388	0.005708	306	2.339	329	5,266.86
(K)NLHIVFGSGSISGSVGTDTFMLGK(H)	100%	88.37	25	88.37	2		808.746	2,423.22	3	58,493.30	0.0003181	306	0.1312	329	5,422.88
(K)NLHIVFGSGSISGSVGTDTFmLGK(H)	100%	73.63	25	73.63	2	Oxidation (+16)	814.0761	2,439.21	3	148397	-0.00418	306	-1.713	329	5,042.81
(K)NLHIVFGSGSISGSVGTDTFMLGK(H)	100%	77.93	25	77.93	2		808.7449	2,423.21	3	22,155.60	-0.002796	306	-1.153	329	6,114.40
(K)NLHIVFGSGSISGSVGTDTFmLGK(H)	100%	86.36	25	86.36	2	Oxidation (+16)	814.0779	2,439.21	3	199579	0.001313	306	0.5381	329	5,025.78
(K)NLHIVFGSGSISGSVGTDTFMLGK(H)	100%	84.38	25	84.38	2		808.7454	2,423.21	3	13,172.10	-0.001332	306	-0.5494	329	6,877.37
(K)NLHIVFGSGSISGSVGTDTFmLGK(H)	100%	84.3	25	84.3	2	Oxidation (+16)	814.0782	2,439.21	3	46,811.10	0.002045	306	0.8381	329	5,829.84
(K)NLHIVFGSGSISGSVGTDTFmLGK(H)	100%	84.32	25	84.32	2	Oxidation (+16)	814.0782	2,439.21	3	20,321.20	0.002045	306	0.8381	329	6,545.02
(K)NLHIVFGSGSISGSVGTDTFmLGK(H)	100%	86.78	25	86.78	2	Oxidation (+16)	814.0774	2,439.21	3	2596960	-0.000334	306	-0.1369	329	4,737.17
(K)NLHIVFGSGSISGSVGTDTFMLGK(H)	100%	29.49	25	29.49	2		808.7422	2,423.20	3	228209	-0.01103	306	-4.552	329	4,684.10
(K)NLHIVFGSGSISGSVGTDTFmLGK(H)	100%	87.79	25	87.79	2	Oxidation (+16)	814.0775	2,439.21	3	50,962.40	-0.000151	306	-0.06186	329	5,848.00
(K)NLHIVFGSGSISGSVGTDTFMLGK(H)	100%	89.03	25	88.34	2		808.746	2,423.22	3	488500	0.0003181	306	0.1312	329	5,002.32
(K)NLHIVFGSGSISGSVGTDTFMLGK(H)	100%	85.85	25	85.85	2		808.7455	2,423.21	3	25,638.20	-0.001149	306	-0.4739	329	5,999.65
(K)NLHIVFGSGSISGSVGTDTFMLGK(H)	100%	57.99	25	57.99	2		808.7439	2,423.21	3	8,884.87	-0.00591	306	-2.438	329	6,945.83
(K)NLHIVFGSGSISGSVGTDTFMLGK(H)	100%	86.71	25	85.55	2		808.7462	2,423.22	3	1362690	0.00105	306	0.4332	329	4,966.68
(K)NLHIVFGSGSISGSVGTDTFmLGK(H)	100%	85.84	25	85.84	2	Oxidation (+16)	814.0781	2,439.21	3	223298	0.001862	306	0.7631	329	5,008.31
(K)NLHIVFGSGSISGSVGTDTFmLGK(H)	100%	84.63	25	84.63	2	Oxidation (+16)	814.0782	2,439.21	3	44,578.40	0.002228	306	0.9131	329	6,011.54
(K)NLHIVFGSGSISGSVGTDTFMLGK(H)	100%	20.86	25	20.86	2		808.7466	2,423.22	3	7,304.15	0.002148	306	0.8861	329	7,357.17
(K)NLHIVFGSGSISGSVGTDTFMLGK(H)	100%	71.64	25	71.64	2		808.7441	2,423.21	3	40,733.80	-0.005175	306	-2.135	329	5,606.23
(K)NLHIVFGSGSISGSVGTDTFmLGK(H)	100%	80.13	25	80.13	2	Oxidation (+16)	814.0765	2,439.21	3	153891	-0.003082	306	-1.263	329	5,185.77
(K)NLHIVFGSGSISGSVGTDTFMLGK(H)	100%	75.73	25	75.73	2		808.7446	2,423.21	3	15,457.20	-0.003894	306	-1.606	329	6,706.13
(K)NLHIVFGSGSISGSVGTDTFmLGK(H)	100%	87.52	25	87.52	2	Oxidation (+16)	814.0774	2,439.21	3	429332	-0.000334	306	-0.1369	329	4,803.80
(K)NLHIVFGSGSISGSVGTDTFmLGK(H)	100%	74.05	25	74.05	2	Oxidation (+16)	814.0794	2,439.22	3	12,285.30	0.005708	306	2.339	329	6,934.93
(K)NLHIVFGSGSISGSVGTDTFMLGK(H)	100%	80.64	25	80.43	2		808.745	2,423.21	3	95,346.70	-0.002613	306	-1.078	329	5,287.39
(K)NLHIVFGSGSISGSVGTDTFmLGK(H)	100%	80.32	25	80.32	2	Oxidation (+16)	814.079	2,439.22	3	49,287.90	0.004424	306	1.813	329	6,273.96
(K)NLHIVFGSGSISGSVGTDTFmLGK(H)	100%	76.08	25	76.08	2	Oxidation (+16)	814.0762	2,439.21	3	83,735.90	-0.003814	306	-1.563	329	5,450.41
(K)NLHIVFGSGSISGSVGTDTFMLGK(H)	100%	82.8	25	82.8	2		808.7471	2,423.22	3	25,673.00	0.003612	306	1.49	329	6,228.74
(K)NLHIVFGSGSISGSVGTDTFMLGK(H)	100%	86.89	25	86.77	2		808.7465	2,423.22	3	72,915.90	0.001782	306	0.7351	329	5,318.69
(K)NLHIVFGSGSISGSVGTDTFmLGK(H)	100%	87.85	25	87.85	2	Oxidation (+16)	814.0779	2,439.21	3	44,921.90	0.001313	306	0.5381	329	6,075.55
(K)NLHIVFGSGSISGSVGTDTFMLGK(H)	100%	87.76	25	87.76	2		808.7464	2,423.22	3	33,650.80	0.001599	306	0.6596	329	5,763.48
(K)NLHIVFGSGSISGSVGTDTFmLGK(H)	100%	81.54	25	81.54	2	Oxidation (+16)	814.0789	2,439.21	3	26,023.80	0.004241	306	1.738	329	6,747.62
(K)NLHIVFGSGSISGSVGTDTFmLGK(H)	100%	87.37	25	87.37	2	Oxidation (+16)	814.0771	2,439.21	3	18,842.00	-0.001252	306	-0.513	329	6,811.50
(K)NLHIVFGSGSISGSVGTDTFMLGK(H)	100%	81.95	25	81.95	2		808.7473	2,423.22	3	22,874.60	0.004344	306	1.792	329	6,147.83
(K)NLHIVFGSGSISGSVGTDTFMLGK(H)	100%	87.89	25	87.89	2		808.7463	2,423.22	3	21,830.70	0.001233	306	0.5086	329	6,098.63
(K)NLHIVFGSGSISGSVGTDTFmLGK(H)	100%	88.85	25	88.85	2	Oxidation (+16)	814.0775	2,439.21	3	60,420.10	0.00003205	306	0.01313	329	5,711.79
(K)NLHIVFGSGSISGSVGTDTFmLGK(H)	100%	83.6	25	83.6	2	Oxidation (+16)	814.0789	2,439.21	3	58,360.10	0.004058	306	1.663	329	5,777.76
(K)NLHIVFGSGSISGSVGTDTFmLGK(H)	100%	88.38	25	88.38	2	Oxidation (+16)	814.0779	2,439.21	3	40,817.00	0.001313	306	0.5381	329	6,482.59
(K)NLHIVFGSGSISGSVGTDTFmLGK(H)	100%	78.21	25	78.21	2	Oxidation (+16)	814.0763	2,439.21	3	24,321.90	-0.003631	306	-1.488	329	6,857.16
(K)NLHIVFGSGSISGSVGTDTFMLGK(H)	100%	23.47	25	23.47	2		808.7421	2,423.20	3	39,836.20	-0.0114	306	-4.704	329	4,726.51
(K)NLHIVFGSGSISGSVGTDTFMLGK(H)	100%	89.36	25	89.16	2		808.7459	2,423.22	3	16,347.60	-0.00004794	306	-0.01978	329	6,179.96
(K)NLHIVFGSGSISGSVGTDTFmLGK(H)	100%	88.05	25	88.05	2	Oxidation (+16)	814.0778	2,439.21	3	31,686.60	0.000947	306	0.3881	329	6,778.87
(K)NLHIVFGSGSISGSVGTDTFMLGK(H)	100%	69.82	25	69.82	2		808.7484	2,423.22	3	22,281.80	0.007641	306	3.152	329	6,244.63
(K)NLHIVFGSGSISGSVGTDTFMLGK(H)	100%	89.89	25	89.89	2		808.7458	2,423.22	3	30,163.10	-0.0002309	306	-0.09526	329	5,586.80
(K)NLHIVFGSGSISGSVGTDTFmLGK(H)	100%	88.21	25	88.21	2	Oxidation (+16)	814.0778	2,439.21	3	15,095.40	0.000947	306	0.3881	329	6,919.16
(K)NLHIVFGSGSISGSVGTDTFmLGK(H)	100%	69.69	25	69.69	2	Oxidation (+16)	814.0756	2,439.20	3	159457	-0.005827	306	-2.388	329	5,069.14
(K)NLHIVFGSGSISGSVGTDTFmLGK(H)	100%	86.41	25	86.41	2	Oxidation (+16)	814.0785	2,439.21	3	42,958.00	0.00296	306	1.213	329	5,884.08
(K)NLHIVFGSGSISGSVGTDTFMLGK(H)	100%	90.63	25	90.63	2		808.746	2,423.22	3	735833	0.0005011	306	0.2067	329	4,984.00
(K)NLHIVFGSGSISGSVGTDTFmLGK(H)	100%	85.95	25	85.95	2	Oxidation (+16)	814.0786	2,439.21	3	50,423.80	0.003326	306	1.363	329	5,812.52
(K)NLHIVFGSGSISGSVGTDTFMLGK(H)	100%	88.7	25	88.7	2		808.7455	2,423.21	3	62,006.60	-0.001149	306	-0.4739	329	5,387.95
(K)NLHIVFGSGSISGSVGTDTFMLGK(H)	100%	76.37	25	76.37	2		808.7441	2,423.21	3	20,076.10	-0.005358	306	-2.21	329	6,574.40
(K)NLHIVFGSGSISGSVGTDTFMLGK(H)	100%	88.82	25	88.37	2		808.7465	2,423.22	3	51,656.30	0.001782	306	0.7351	329	5,405.28
(K)NLHIVFGSGSISGSVGTDTFMLGK(H)	100%	87.09	25	86.97	2		808.7469	2,423.22	3	36,494.60	0.003063	306	1.264	329	5,709.92
(K)NLHIVFGSGSISGSVGTDTFMLGK(H)	100%	89.39	25	89.39	2		808.7463	2,423.22	3	25,885.90	0.001233	306	0.5086	329	6,034.13
(K)NLHIVFGSGSISGSVGTDTFMLGK(H)	100%	89.53	25	88.99	2		808.7462	2,423.22	3	25,190.30	0.00105	306	0.4332	329	5,888.34
(K)NLHIVFGSGSISGSVGTDTFmLGK(H)	100%	88.21	25	88.21	2	Oxidation (+16)	814.0782	2,439.21	3	63,272.90	0.002045	306	0.8381	329	5,795.51
(K)NLHIVFGSGSISGSVGTDTFmLGK(H)	100%	58.43	25	58.43	2	Oxidation (+16)	610.8151	2,439.23	4	28,664.30	0.02046	306	8.386	329	4,241.68
(K)NLHIVFGSGSISGSVGTDTFmLGK(H)	100%	79.73	25	79.73	2	Oxidation (+16)	814.0795	2,439.22	3	31,103.40	0.006074	306	2.489	329	6,609.21
(K)NLHIVFGSGSISGSVGTDTFMLGK(H)	100%	84.41	25	84.41	2		808.7474	2,423.22	3	28,890.10	0.004527	306	1.867	329	6,386.49
(K)NLHIVFGSGSISGSVGTDTFMLGK(H)	100%	20.43	25	20.41	2		808.746	2,423.22	3	9,191.28	0.0003181	306	0.1312	329	7,333.47
(K)NLHIVFGSGSISGSVGTDTFMLGK(H)	100%	87.57	25	87.57	2		808.7468	2,423.22	3	22,150.70	0.00288	306	1.188	329	5,913.94
(K)NLHIVFGSGSISGSVGTDTFmLGK(H)	100%	91.95	25	91.95	2	Oxidation (+16)	814.0775	2,439.21	3	38,309.20	-0.000151	306	-0.06186	329	6,399.90
(K)NLHIVFGSGSISGSVGTDTFMLGK(H)	100%	89.59	25	89.05	2		808.7465	2,423.22	3	29,371.00	0.001782	306	0.7351	329	5,799.15
(K)NLHIVFGSGSISGSVGTDTFMLGK(H)	100%	88.64	25	88.64	2		808.7466	2,423.22	3	26,624.00	0.002148	306	0.8861	329	5,868.03
(K)NLHIVFGSGSISGSVGTDTFmLGK(H)	100%	89.44	25	89.44	2	Oxidation (+16)	814.0781	2,439.21	3	21,502.60	0.001862	306	0.7631	329	6,701.74
(K)NLHIVFGSGSISGSVGTDTFmLGK(H)	100%	80.79	25	80.79	2	Oxidation (+16)	814.0795	2,439.22	3	56,530.20	0.006074	306	2.489	329	5,761.70
(K)NLHIVFGSGSISGSVGTDTFmLGK(H)	100%	90.95	25	90.95	2	Oxidation (+16)	814.0774	2,439.21	3	33,848.20	-0.000334	306	-0.1369	329	6,624.44
(K)NLHIVFGSGSISGSVGTDTFMLGK(H)	100%	87.56	25	87.56	2		808.747	2,423.22	3	159491	0.003429	306	1.414	329	5,156.63
(K)NLHIVFGSGSISGSVGTDTFMLGK(H)	100%	89.03	25	88.81	2		808.7466	2,423.22	3	44,357.70	0.002148	306	0.8861	329	5,505.12
(K)NLHIVFGSGSISGSVGTDTFMLGK(H)	100%	90.77	25	89.86	2		808.7455	2,423.21	3	5797100	-0.001149	306	-0.4739	329	4,949.79
(K)NLHIVFGSGSISGSVGTDTFMLGK(H)	100%	89.67	25	88.81	2		808.7466	2,423.22	3	23,502.00	0.002148	306	0.8861	329	6,066.01
(K)NLHIVFGSGSISGSVGTDTFMLGK(H)	100%	85.96	25	85.1	2		808.7474	2,423.22	3	24,752.20	0.004713	306	1.944	329	5,983.08
(K)NLHIVFGSGSISGSVGTDTFMLGK(H)	100%	91.66	25	91.27	2		808.7462	2,423.22	3	44,519.50	0.0008671	306	0.3577	329	5,473.98
(K)NLHIVFGSGSISGSVGTDTFmLGK(H)	100%	78.43	25	78.43	2	Oxidation (+16)	814.0797	2,439.22	3	20,861.80	0.006623	306	2.714	329	7,328.64
(K)NLHIVFGSGSISGSVGTDTFmLGK(H)	100%	92.39	25	92.39	2	Oxidation (+16)	814.0774	2,439.21	3	66,413.50	-0.000334	306	-0.1369	329	5,629.07
(K)NLHIVFGSGSISGSVGTDTFMLGK(H)	100%	82.99	25	82.99	2		808.7478	2,423.22	3	27,446.30	0.005811	306	2.397	329	6,316.62
(K)NLHIVFGSGSISGSVGTDTFMLGK(H)	100%	92.75	25	92.07	2		808.7463	2,423.22	3	101311	0.001416	306	0.5841	329	5,206.08
(K)NLHIVFGSGSISGSVGTDTFMLGK(H)	100%	68.74	25	68.74	2		808.7418	2,423.20	3	14,733.90	-0.01232	306	-5.081	329	6,539.83
(K)NLHIVFGSGSISGSVGTDTFMLGK(H)	100%	76.31	25	76.31	2		808.7487	2,423.22	3	15,559.20	0.008373	306	3.454	329	6,670.94
(K)NLHIVFGSGSISGSVGTDTFMLGK(H)	100%	89.67	25	89.67	2		808.7467	2,423.22	3	26,027.80	0.002514	306	1.037	329	6,333.67
(K)NLHIVFGSGSISGSVGTDTFmLGK(H)	100%	79.59	25	79.59	2	Oxidation (+16)	814.08	2,439.22	3	30,697.10	0.007355	306	3.014	329	6,670.15
(K)NLHIVFGSGSISGSVGTDTFmLGK(H)	100%	95.05	25	95.05	2	Oxidation (+16)	814.0775	2,439.21	3	34,677.20	-0.000151	306	-0.06186	329	6,308.17
(K)NLHIVFGSGSISGSVGTDTFmLGK(H)	100%	92.74	25	92.74	2	Oxidation (+16)	814.0778	2,439.21	3	220756	0.000947	306	0.3881	329	4,788.28
(K)NLHIVFGSGSISGSVGTDTFmLGK(H)	100%	97.42	25	97.42	2	Oxidation (+16)	814.0776	2,439.21	3	543431	0.000215	306	0.08813	329	4,871.26
(K)NLHIVFGSGSISGSVGTDTFmLGK(H)	100%	93.95	25	93.95	2	Oxidation (+16)	814.0779	2,439.21	3	58,716.90	0.001313	306	0.5381	329	5,744.48
(K)NLHIVFGSGSISGSVGTDTFmLGK(H)	100%	89.86	25	89.86	2	Oxidation (+16)	814.0785	2,439.21	3	40,515.80	0.00296	306	1.213	329	6,207.21
(K)NLHIVFGSGSISGSVGTDTFMLGK(H)	100%	72.59	25	72.59	2		808.7423	2,423.21	3	21,448.40	-0.01067	306	-4.401	329	4,918.58
(K)NLHIVFGSGSISGSVGTDTFmLGK(H)	100%	91.55	25	91.55	2	Oxidation (+16)	814.077	2,439.21	3	575906	-0.001435	306	-0.588	329	4,770.65
(K)NLHIVFGSGSISGSVGTDTFmLGK(H)	100%	93.52	25	93.52	2	Oxidation (+16)	814.0773	2,439.21	3	3851710	-0.0007	306	-0.2868	329	4,721.37
(K)NLHIVFGSGSISGSVGTDTFmLGK(H)	100%	90.2	25	90.2	2	Oxidation (+16)	814.0769	2,439.21	3	243692	-0.001801	306	-0.738	329	4,674.99
(K)NLHIVFGSGSISGSVGTDTFMLGK(H)	100%	88	25	87.54	2		808.745	2,423.21	3	30,177.80	-0.002613	306	-1.078	329	5,693.15
(K)NLHIVFGSGSISGSVGTDTFMLGK(H)	100%	93.64	25	93.64	2		808.7462	2,423.22	3	18,507.70	0.00105	306	0.4332	329	6,505.87
(K)NLHIVFGSGSISGSVGTDTFMLGK(H)	100%	88.03	25	87.39	2		808.7473	2,423.22	3	15,089.90	0.004161	306	1.716	329	6,196.49
(K)NLHIVFGSGSISGSVGTDTFMLGK(H)	100%	82.5	25	82.5	2		808.748	2,423.22	3	18,307.80	0.006543	306	2.699	329	6,605.80
(K)NLHIVFGSGSISGSVGTDTFmLGK(H)	100%	90.63	25	90.63	2	Oxidation (+16)	814.0784	2,439.21	3	43,929.30	0.002777	306	1.138	329	6,108.78
(K)NLHIVFGSGSISGSVGTDTFmLGK(H)	100%	94.43	25	94.43	2	Oxidation (+16)	814.0781	2,439.21	3	34,200.00	0.001862	306	0.7631	329	6,223.68
(K)NLHIVFGSGSISGSVGTDTFmLGK(H)	100%	85.68	25	85.68	2	Oxidation (+16)	814.0793	2,439.22	3	42,872.70	0.005342	306	2.189	329	6,158.20
(K)NLHIVFGSGSISGSVGTDTFMLGK(H)	100%	96.04	25	96.04	2		808.7463	2,423.22	3	42,878.10	0.001233	306	0.5086	329	5,621.82
(K)NLHIVFGSGSISGSVGTDTFMLGK(H)	100%	98.51	25	98.51	2		808.7459	2,423.22	3	101892	0.0001351	306	0.05571	329	5,238.47
(K)NLHIVFGSGSISGSVGTDTFMLGK(H)	100%	93.71	25	93.71	2		808.7467	2,423.22	3	13,539.70	0.002514	306	1.037	329	6,721.27
(K)NLHIVFGSGSISGSVGTDTFMLGK(H)	100%	92.92	25	92.92	2		808.7452	2,423.21	3	63,914.30	-0.001881	306	-0.7759	329	5,439.60
(K)NLHIVFGSGSISGSVGTDTFmLGK(H)	100%	82.36	25	82.36	2	Oxidation (+16)	814.0756	2,439.20	3	290165	-0.005827	306	-2.388	329	4,939.37
(K)NLHIVFGSGSISGSVGTDTFmLGK(H)	100%	100.16	25	100.16	2	Oxidation (+16)	814.0775	2,439.21	3	1486420	-0.000151	306	-0.06186	329	4,752.70
(K)NLHIVFGSGSISGSVGTDTFMLGK(H)	100%	97.56	25	96.87	2		808.7462	2,423.22	3	341519	0.00105	306	0.4332	329	5,020.04
(K)NLHIVFGSGSISGSVGTDTFmLGK(H)	100%	93.11	25	93.11	2	Oxidation (+16)	814.0786	2,439.21	3	32,385.40	0.003326	306	1.363	329	6,059.89
(K)NLHIVFGSGSISGSVGTDTFMLGK(H)	100%	90.07	25	90.04	2		808.7474	2,423.22	3	22,740.80	0.004527	306	1.867	329	6,453.34
(K)NLHIVFGSGSISGSVGTDTFmLGK(H)	100%	90.45	25	90.45	2	Oxidation (+16)	814.079	2,439.22	3	28,022.80	0.00461	306	1.889	329	6,655.05
(K)NLHIVFGSGSISGSVGTDTFmLGK(H)	100%	97.54	25	97.54	2	Oxidation (+16)	814.0773	2,439.21	3	526612	-0.000517	306	-0.2118	329	4,819.97
(K)NLHIVFGSGSISGSVGTDTFmLGK(H)	100%	90.57	25	90.57	2	Oxidation (+16)	814.0791	2,439.22	3	32,483.60	0.004793	306	1.964	329	6,577.39
(K)NLHIVFGSGSISGSVGTDTFMLGK(H)	100%	98.09	25	98.09	2		808.7455	2,423.21	3	27,550.00	-0.001149	306	-0.4739	329	6,420.57
(K)NLHIVFGSGSISGSVGTDTFmLGK(H)	100%	98.67	25	98.67	2	Oxidation (+16)	814.0773	2,439.21	3	100124	-0.0007	306	-0.2868	329	5,250.64
(K)NLHIVFGSGSISGSVGTDTFMLGK(H)	100%	96.54	25	95.6	2		808.7468	2,423.22	3	181500	0.002697	306	1.113	329	5,038.48
(K)NLHIVFGSGSISGSVGTDTFmLGK(H)	100%	100.49	25	100.49	2	Oxidation (+16)	814.0779	2,439.21	3	60,347.30	0.001313	306	0.5381	329	5,694.60
(K)NLHIVFGSGSISGSVGTDTFMLGK(H)	100%	93.5	25	92.78	2		808.745	2,423.21	3	89,458.00	-0.002613	306	-1.078	329	5,190.53
(K)NLHIVFGSGSISGSVGTDTFMLGK(H)	100%	107.64	25	107.13	2		808.746	2,423.22	3	44,155.00	0.0005011	306	0.2067	329	5,370.24
(K)NLHIVFGSGSISGSVGTDTFMLGK(H)	99%	99.02	25	98.69	2		808.7468	2,423.22	3	49,086.80	0.002697	306	1.113	329	5,336.38
(K)NLHIVFGSGSISGSVGTDTFMLGK(H)	99%	101.73	25	101.25	2		808.7457	2,423.22	3	175920	-0.0005969	306	-0.2462	329	5,105.07
(K)NLHIVFGSGSISGSVGTDTFMLGK(H)	99%	95.73	25	95.73	2		808.7471	2,423.22	3	145558	0.003795	306	1.565	329	5,139.27
(K)NLHIVFGSGSISGSVGTDTFmLGK(H)	99%	86.77	25	86.77	2	Oxidation (+16)	814.0753	2,439.20	3	201694	-0.006562	306	-2.689	329	4,972.78
(K)NLHIVFGSGSISGSVGTDTFmLGK(H)	99%	99.28	25	99.28	2	Oxidation (+16)	814.0768	2,439.21	3	69,017.50	-0.001984	306	-0.813	329	5,613.45
(K)NLHIVFGSGSISGSVGTDTFmLGK(H)	99%	106.05	25	106.05	2	Oxidation (+16)	814.0773	2,439.21	3	35,359.20	-0.0007	306	-0.2868	329	6,417.08
(K)NLHIVFGSGSISGSVGTDTFMLGK(H)	99%	113.85	25	113.05	2		808.7459	2,423.22	3	57,502.40	-0.00004794	306	-0.01978	329	5,303.16
(K)NLHIVFGSGSISGSVGTDTFMLGK(H)	99%	109.67	25	109.67	2		808.7457	2,423.22	3	44,983.60	-0.0004139	306	-0.1708	329	5,352.84
(K)NLHIVFGSGSISGSVGTDTFmLGK(H)	99%	93.07	25	93.07	2	Oxidation (+16)	814.0763	2,439.21	3	13,970.60	-0.003631	306	-1.488	329	6,950.89
(K)NLHIVFGSGSISGSVGTDTFMLGK(H)	99%	103.5	25	103.5	2		808.7468	2,423.22	3	19,858.40	0.002697	306	1.113	329	5,948.71
(K)NLHIVFGSGSISGSVGTDTFmLGK(H)	99%	101.25	25	101.25	2	Oxidation (+16)	814.0786	2,439.21	3	614762	0.003143	306	1.288	329	4,837.45
(K)NLHIVFGSGSISGSVGTDTFMLGK(H)	99%	103.85	25	103.29	2		808.7452	2,423.21	3	133957	-0.001881	306	-0.7759	329	5,122.20
(K)NLHIVFGSGSISGSVGTDTFmLGK(H)	99%	102.84	25	102.84	2	Oxidation (+16)	814.0788	2,439.21	3	33,470.70	0.003875	306	1.588	329	6,450.12
(K)NLHIVFGSGSISGSVGTDTFMLGK(H)	99%	109.34	25	109.34	2		808.7469	2,423.22	3	21,777.60	0.003063	306	1.264	329	6,132.20
(K)NLHIVFGSGSISGSVGTDTFMLGK(H)	99%	104.98	25	103.63	2		808.7474	2,423.22	3	23,735.20	0.004713	306	1.944	329	6,081.87
(K)NLHIVFGSGSISGSVGTDTFMLGK(H)	99%	100.35	25	99.93	2		808.7445	2,423.21	3	163502	-0.004077	306	-1.682	329	5,073.69
(K)NLHIVFGSGSISGSVGTDTFmLGK(H)	99%	16.19	25	16.19	2	Oxidation (+16)	814.0792	2,439.22	3	20,451.90	0.004976	306	2.039	329	4,510.50
(K)NLHIVFGSGSISGSVGTDTFmLGK(H)	98%	96.85	25	96.85	2	Oxidation (+16)	814.0804	2,439.22	3	149075	0.008819	306	3.614	329	7,281.92
(K)NLHIVFGSGSISGSVGTDTFMLGK(H)	98%	105.76	25	105.76	2		808.7479	2,423.22	3	25,487.10	0.005994	306	2.473	329	6,351.62
(K)NLHIVFGSGSISGSVGTDTFmLGK(H)	98%	110.18	25	110.18	2	Oxidation (+16)	814.0758	2,439.21	3	58,684.30	-0.005095	306	-2.088	329	5,597.20
(K)NLHIVFGSGSISGSVGTDTFMLGK(H)	97%	14.08	25	14.08	2		808.7453	2,423.21	3	5,968.06	-0.001698	306	-0.7004	329	7,372.64
(K)NLHIVFGSGSISGSVGTDTFMLGK(H)	97%	107.81	25	107.81	2		808.7438	2,423.21	3	135118	-0.006093	306	-2.513	329	5,089.94
(K)NLHIVFGSGSISGSVGTDTFmLGKHLVR(N)	100%	58.9	25	58.9	2	Oxidation (+16)	737.1325	2,944.50	4	24,464.00	-0.02226	306	-7.558	333	4,917.82
(K)NLHIVFGSGSISGSVGTDTFmLGKHLVR(N)	100%	93.9	25	93.9	2	Oxidation (+16)	737.1376	2,944.52	4	68,484.20	-0.001753	306	-0.5951	333	4,240.77
(H)IVFGSGSISGSVGTDTFMLGK(H)	99%	105.83	25	105.83	1		1,030.52	2,059.03	2	36,478.90	-0.00121	309	-0.5873	329	4,980.87
(F)GSGSISGSVGTDTFmLGK(H)	100%	72.68	25	72.68	1	Oxidation (+16)	858.9099	1,715.81	2	20,259.30	0.001265	312	0.7369	329	3,191.27
(F)GSGSISGSVGTDTFmLGK(H)	100%	79.89	25	79.89	1	Oxidation (+16)	858.9091	1,715.80	2	32,417.10	-0.000321	312	-0.1869	329	3,208.00
(F)GSGSISGSVGTDTFMLGK(H)	99%	91.91	25	91.91	1		850.9139	1,699.81	2	32,076.90	0.004236	312	2.491	329	3,564.80
(F)GSGSISGSVGTDTFmLGK(H)	99%	17.69	25	17.69	1	Oxidation (+16)	858.91	1,715.81	2	11,729.20	0.001631	312	0.95	329	3,226.80
(G)SGSISGSVGTDTFmLGK(H)	100%	54.46	25	54.46	1	Oxidation (+16)	830.3992	1,658.78	2	18,442.00	0.001403	313	0.8453	329	3,216.13
(G)SGSISGSVGTDTFmLGK(H)	100%	89.72	25	89.72	1	Oxidation (+16)	830.3996	1,658.78	2	45,472.30	0.002257	313	1.36	329	3,182.48
(G)SGSISGSVGTDTFmLGK(H)	100%	20.71	25	20.71	1	Oxidation (+16)	830.3995	1,658.78	2	22,578.60	0.002135	313	1.286	329	3,304.22
(G)SGSISGSVGTDTFMLGK(H)	100%	100.06	25	100.06	1		822.4008	1,642.79	2	60,340.60	-0.0005079	313	-0.309	329	3,557.28
(G)SGSISGSVGTDTFmLGK(H)	99%	103.66	25	103.66	1	Oxidation (+16)	830.3983	1,658.78	2	104677	-0.000429	313	-0.2584	329	3,198.24
(S)GSISGSVGTDTFmLGK(H)	100%	75.74	25	75.74	1	Oxidation (+16)	786.8823	1,571.75	2	25,040.50	-0.000289	314	-0.1837	329	3,188.77
(S)GSISGSVGTDTFMLGK(H)	100%	45.99	25	45.99	1		778.8806	1,555.75	2	48,997.00	-0.008914	314	-5.726	329	3,568.50
(S)GSISGSVGTDTFmLGK(H)	100%	90.09	25	90.09	1	Oxidation (+16)	786.8824	1,571.75	2	25,759.60	-0.000167	314	-0.1062	329	3,206.29
(G)SISGSVGTDTFmLGK(H)	100%	59.43	25	59.43	1	Oxidation (+16)	758.372	1,514.73	2	20,265.50	0.000581	315	0.3833	329	3,204.79
(G)SISGSVGTDTFmLGK(H)	100%	66.14	25	66.14	1	Oxidation (+16)	758.371	1,514.73	2	33,121.20	-0.001493	315	-0.985	329	3,169.54
(G)SISGSVGTDTFmLGK(H)	100%	88.54	25	88.54	1	Oxidation (+16)	758.3719	1,514.73	2	88,795.50	0.000459	315	0.3029	329	3,186.36
(G)SISGSVGTDTFMLGK(H)	100%	85.97	25	85.97	1		750.3729	1,498.73	2	69,342.40	-0.002672	315	-1.782	329	3,554.35
(G)SISGSVGTDTFmLGK(H)	91%	13.41	25	13.41	1	Oxidation (+16)	758.3734	1,514.73	2	18,182.60	0.003389	315	2.236	329	3,222.98
(S)ISGSVGTDTFmLGK(H)	100%	80.23	25	80.23	1	Oxidation (+16)	714.8563	1,427.70	2	43,546.20	0.001209	316	0.8463	329	3,004.55
(S)ISGSVGTDTFmLGK(H)	100%	85.07	25	85.07	1	Oxidation (+16)	714.8568	1,427.70	2	17,854.40	0.002063	316	1.444	329	2,987.05
(S)ISGSVGTDTFMLGK(H)	98%	90.75	25	90.75	1		706.8618	1,411.71	2	26,920.00	0.00711	316	5.033	329	3,368.22
(I)SGSVGTDTFmLGK(H)	100%	38.74	25	38.74	1	Oxidation (+16)	658.3135	1,314.61	2	17,226.40	-0.000261	317	-0.1983	329	2,556.30
(S)GSVGTDTFmLGK(H)	100%	31.53	25	31.53	1	Oxidation (+16)	614.798	1,227.58	2	80,859.50	0.000733	318	0.5967	329	2,573.06
(S)GSVGTDTFmLGK(H)	100%	68.4	25	68.4	1	Oxidation (+16)	614.7983	1,227.58	2	28,572.60	0.001343	318	1.093	329	2,554.78
(S)GSVGTDTFMLGK(H)	100%	51.35	25	51.35	1		606.7984	1,211.58	2	27,126.80	-0.00362	318	-2.985	329	2,950.28
(S)GSVGTDTFMLGK(H)	99%	15.13	25	15.13	1		606.8005	1,211.59	2	16,039.60	0.0006521	318	0.5377	329	2,971.45
(G)SVGTDTFMLGK(H)	100%	38.2	25	38.2	1		578.2896	1,154.56	2	27,430.50	0.0003021	319	0.2614	329	2,972.56
(G)SVGTDTFMLGK(H)	100%	42.52	25	42.52	1		578.2896	1,154.56	2	35,606.70	0.0003021	319	0.2614	329	2,955.66
(G)SVGTDTFmLGK(H)	100%	49.89	25	49.11	1	Oxidation (+16)	586.2875	1,170.56	2	39,724.10	0.001237	319	1.056	329	2,555.65
(G)SVGTDTFmLGK(H)	100%	58.46	25	57.35	1	Oxidation (+16)	586.2872	1,170.56	2	91,477.60	0.000503	319	0.4294	329	2,572.91
(S)VGTDTFmLGK(H)	100%	38.55	25	38.55	1	Oxidation (+16)	542.7717	1,083.53	2	45,567.70	0.001497	320	1.38	329	2,459.41
(S)VGTDTFMLGK(H)	100%	49.98	25	41.86	1		534.7734	1,067.53	2	21,333.80	-0.0001699	320	-0.159	329	2,860.52
(S)VGTDTFMLGK(H)	100%	45.35	25	40.3	1		534.775	1,067.54	2	17,828.40	0.003126	320	2.926	329	2,843.89
(S)VGTDTFmLGK(H)	100%	21.18	25	21.18	1	Oxidation (+16)	542.7708	1,083.53	2	69,890.60	-0.000211	320	-0.1945	329	2,482.21
(G)TDTFmLGK(H)	99%	39.99	25	31.26	1	Oxidation (+16)	464.7259	927.4372	2	31,540.40	-0.000215	322	-0.2315	329	2,147.66
(G)TDTFMLGK(H)	99%	46.78	25	46.78	1		456.7287	911.4428	2	29,885.10	0.0003761	322	0.4121	329	2,447.15
(G)TDTFMLGK(H)	99%	30.87	25	30.87	1		456.7285	911.4424	2	22,435.70	-0.0001119	322	-0.1227	329	2,464.66
(R)NQTFGLVESESNNNK(N)	100%	81.89	25	81.89	2		840.8943	1,679.77	2	29,711.60	-0.001048	334	-0.6235	348	2,372.84
(N)QTFGLVESESNNNK(N)	100%	76.92	25	76.92	1		783.8728	1,565.73	2	21,205.90	-0.001116	335	-0.7123	348	2,300.39
(K)NGGDNIFDYISFEGIVGLGFPGmLSAGNIPFFDNLLK(Q)	100%	64.86	25	64.86	2	Oxidation (+16)	1,322.32	3,963.94	3	89,865.00	0.003252	349	0.8202	385	6,682.84
(K)NGGDNIFDYISFEGIVGLGFPGmLSAGNIPFFDNLLK(Q)	100%	66	25	66	2	Oxidation (+16)	1,322.32	3,963.94	3	232192	-0.002241	349	-0.5652	385	6,698.21
(K)NGGDNIFDYISFEGIVGLGFPGMLSAGNIPFFDNLLK(Q)	100%	62.52	25	62.52	2		1,316.99	3,947.95	3	19,737.80	0.00427	349	1.081	385	6,768.81
(K)NGGDNIFDYISFEGIVGLGFPGMLSAGNIPFFDNLLK(Q)	100%	78.79	25	78.79	2		1,316.99	3,947.94	3	92,506.30	-0.0008569	349	-0.217	385	6,751.83
(K)NGGDNIFDYISFEGIVGLGFPGmLSAGNIPFFDNLLK(Q)	100%	23.8	25	23.8	2	Oxidation (+16)	1,322.32	3,963.93	3	13,498.70	-0.008832	349	-2.228	385	6,776.28
(K)NGGDNIFDYISFEGIVGLGFPGMLSAGNIPFFDNLLK(Q)	100%	31.45	25	31.45	2		1,316.98	3,947.93	3	10,306.40	-0.01404	349	-3.555	385	6,784.41
(K)NGGDNIFDYISFEGIVGLGFPGmLSAGNIPFFDNLLK(Q)	100%	72.87	25	72.87	2	Oxidation (+16)	1,322.32	3,963.93	3	81,508.70	-0.007734	349	-1.951	385	6,713.52
(K)NGGDNIFDYISFEGIVGLGFPGMLSAGNIPFFDNLLK(Q)	100%	87.18	25	87.18	2		1,316.99	3,947.95	3	337626	0.007201	349	1.824	385	6,736.68
(K)NGGDNIFDYISFEGIVGLGFPGMLSAGNIPFFDNLLK(Q)	94%	16.28	25	16.28	2		1,316.98	3,947.92	3	18,194.70	-0.02649	349	-6.708	385	6,698.46
(F)EGIVGLGFPGmLSAGNIPFFDNLLK(Q)	100%	42.6	25	42.6	1	Oxidation (+16)	874.7922	2,621.35	3	14,708.50	-0.001905	361	-0.7264	385	6,502.96
(E)GIVGLGFPGmLSAGNIPFFDNLLK(Q)	100%	41.84	25	41.84	1	Oxidation (+16)	831.7781	2,492.31	3	17,912.30	-0.001785	362	-0.7159	385	6,492.83
(G)IVGLGFPGmLSAGNIPFFDNLLK(Q)	100%	29.85	25	29.85	1	Oxidation (+16)	1,218.65	2,435.29	2	5,860.18	-0.006211	363	-2.549	385	6,489.03
(G)IVGLGFPGmLSAGNIPFFDNLLK(Q)	100%	23.48	25	23.48	1	Oxidation (+16)	812.7776	2,435.31	3	15,300.10	0.01825	363	7.491	385	6,483.82
(V)GLGFPGmLSAGNIPFFDNLLK(Q)	100%	40.73	25	40.73	1	Oxidation (+16)	1,112.58	2,223.14	2	20,906.30	-0.002393	365	-1.076	385	6,434.82
(G)LGFPGmLSAGNIPFFDNLLK(Q)	99%	102.76	25	102.76	1	Oxidation (+16)	1,084.07	2,166.12	2	40,529.00	0.002505	366	1.156	385	6,427.19
(L)GFPGmLSAGNIPFFDNLLK(Q)	100%	88.13	25	88.13	1	Oxidation (+16)	1,027.52	2,053.04	2	98,813.70	0.000667	367	0.3247	385	6,371.85
(G)FPGmLSAGNIPFFDNLLK(Q)	100%	82.16	25	82.16	1	Oxidation (+16)	999.0156	1,996.02	2	69,136.60	0.003491	368	1.748	385	6,361.19
(G)FPGMLSAGNIPFFDNLLK(Q)	99%	16.19	25	16.19	1		991.0151	1,980.02	2	11,487.90	-0.002448	368	-1.236	385	6,440.52
(F)PGmLSAGNIPFFDNLLK(Q)	100%	44.63	25	44.63	1	Oxidation (+16)	925.4807	1,848.95	2	9,072.76	0.002067	369	1.117	385	5,955.21
(F)PGmLSAGNIPFFDNLLK(Q)	100%	69.07	25	69.07	1	Oxidation (+16)	925.4825	1,848.95	2	20,114.50	0.005729	369	3.097	385	5,937.29
(P)GmLSAGNIPFFDNLLK(Q)	100%	29.47	25	29.47	1	Oxidation (+16)	876.9524	1,751.89	2	11,004.30	-0.001651	370	-0.9418	385	5,850.80
(P)GmLSAGNIPFFDNLLK(Q)	100%	48.65	25	48.65	1	Oxidation (+16)	876.9523	1,751.89	2	11,107.80	-0.001895	370	-1.081	385	5,868.81
(G)MLSAGNIPFFDNLLK(Q)	100%	24.29	25	24.29	1		840.4458	1,678.88	2	14,893.10	0.00158	371	0.9406	385	6,143.68
(G)mLSAGNIPFFDNLLK(Q)	100%	55.18	25	55.18	1	Oxidation (+16)	848.4438	1,694.87	2	57,392.00	0.002637	371	1.555	385	5,870.96
(G)mLSAGNIPFFDNLLK(Q)	100%	65.92	25	65.92	1	Oxidation (+16)	848.4413	1,694.87	2	25,739.40	-0.002369	371	-1.397	385	5,892.34
(M)LSAGNIPFFDNLLK(Q)	100%	48.8	25	48.8	1		774.9248	1,547.84	2	69,802.80	0.00008806	372	0.05685	385	5,835.37
(M)LSAGNIPFFDNLLK(Q)	100%	36.7	25	36.7	1		774.9254	1,547.84	2	28,456.50	0.001186	372	0.7658	385	5,852.63
(M)LSAGNIPFFDNLLK(Q)	100%	49.46	25	49.46	1		774.925	1,547.84	2	651334	0.0004541	372	0.2932	385	5,816.79
(M)LSAGNIPFFDNLLK(Q)	100%	27.3	25	27.3	1		774.9229	1,547.83	2	41,128.90	-0.003696	372	-2.386	385	5,800.05
(M)LSAGNIPFFDNLLK(Q)	93%	16.57	25	13.12	1		774.9279	1,547.84	2	24,970.50	0.00619	372	3.997	385	5,871.64
(L)SAGNIPFFDNLLK(Q)	100%	34.15	25	34.15	1		718.383	1,434.75	2	223485	0.0005701	373	0.397	385	5,367.37
(L)SAGNIPFFDNLLK(Q)	100%	34.44	25	34.44	1		718.3825	1,434.75	2	852101	-0.0004079	373	-0.2841	385	5,351.28
(L)SAGNIPFFDNLLK(Q)	100%	33.76	25	33.76	1		718.3833	1,434.75	2	42,867.10	0.00118	373	0.8219	385	5,384.58
(L)SAGNIPFFDNLLK(Q)	100%	25.17	25	25.17	1		718.3831	1,434.75	2	17,723.30	0.0006921	373	0.482	385	5,402.47
(L)SAGNIPFFDNLLK(Q)	100%	32.32	25	32.32	1		718.3817	1,434.75	2	31,330.80	-0.001994	373	-1.389	385	5,334.79
(L)SAGNIPFFDNLLK(Q)	98%	14.71	25	14.71	1		718.383	1,434.75	2	11,458.80	0.0005701	373	0.397	385	5,420.43
(S)AGNIPFFDNLLK(Q)	100%	40.37	25	37.11	1		674.8668	1,347.72	2	92,611.10	0.0002201	374	0.1632	385	5,311.60
(S)AGNIPFFDNLLK(Q)	100%	31.01	25	31.01	1		674.8668	1,347.72	2	24,255.80	0.00009806	374	0.0727	385	5,295.69
(S)AGNIPFFDNLLK(Q)	100%	22.38	25	22.38	1		674.8659	1,347.72	2	17,745.30	-0.00161	374	-1.194	385	5,328.21
(A)GNIPFFDNLLK(Q)	100%	32.41	25	26.38	1		639.3479	1,276.68	2	38,890.90	-0.0005219	375	-0.4085	385	5,319.26
(A)GNIPFFDNLLK(Q)	100%	34.18	25	25.71	1		639.3478	1,276.68	2	192068	-0.0007659	375	-0.5995	385	5,303.93
(A)GNIPFFDNLLK(Q)	100%	37.36	25	28.51	1		639.3474	1,276.68	2	26,758.70	-0.00162	375	-1.268	385	5,287.73
(A)GNIPFFDNLLK(Q)	96%	13.66	25	13.66	1		639.3492	1,276.68	2	15,772.90	0.002042	375	1.598	385	5,338.06
(G)NIPFFDNLLK(Q)	100%	25.83	25	22.84	1		610.8375	1,219.66	2	44,472.60	0.0002261	376	0.1852	385	5,427.62
(G)NIPFFDNLLK(Q)	100%	29.86	25	26.8	1		610.8372	1,219.66	2	179522	-0.0003839	376	-0.3145	385	5,410.58
(G)NIPFFDNLLK(Q)	100%	20	25	20	1		610.8372	1,219.66	2	21,188.40	-0.0003839	376	-0.3145	385	5,444.31
(G)NIPFFDNLLK(Q)	99%	18.94	25	18.22	1		610.8385	1,219.66	2	16,051.10	0.00218	376	1.786	385	5,461.28
(G)NIPFFDNLLK(Q)	98%	21.12	25	12.85	1		610.8365	1,219.66	2	27,476.10	-0.001726	376	-1.414	385	5,393.33
(N)IPFFDNLLK(Q)	100%	42.94	25	37.3	1		553.8167	1,105.62	2	35,599.80	0.001378	377	1.245	385	5,156.87
(N)IPFFDNLLK(Q)	100%	41.72	25	31.39	1		553.8162	1,105.62	2	11,903.00	0.0004021	377	0.3633	385	5,173.77
(N)IPFFDNLLK(Q)	100%	36.43	25	30.29	1		553.8157	1,105.62	2	76,271.70	-0.0004519	377	-0.4084	385	5,141.27
(N)IPFFDNLLK(Q)	100%	32.2	25	31.89	1		553.8156	1,105.62	2	22,715.60	-0.0008179	377	-0.7391	385	5,125.75
(I)PFFDNLLK(Q)	99%	37.38	25	33.71	1		497.2736	992.5327	2	16,539.40	-0.0005799	378	-0.5837	385	5,404.44
(I)PFFDNLLK(Q)	99%	21.64	25	20.56	1		497.2739	992.5333	2	16,392.50	0.00003006	378	0.03025	385	4,211.63
(L)KQNPNVDPQFSFYISPYDGK(S)	100%	37.09	25	37.09	1		782.0461	2,343.12	3	33,389.30	-0.0007689	385	-0.328	404	4,048.58
(L)KQNPNVDPQFSFYISPYDGK(S)	100%	64.45	25	64.45	1		782.046	2,343.12	3	61,335.20	-0.001135	385	-0.4842	404	4,030.36
(K)QNPNVDPQFS(F)	100%	18.57	25	18.57	1		573.2647	1,144.51	2	25,073.50	-0.0001039	386	-0.09074	395	2,518.36
(K)QNPNVDPQFSF(Y)	100%	28.93	25	28.93	1		646.7986	1,291.58	2	64,820.90	-0.0007539	386	-0.5833	396	4,270.91
(K)QNPNVDPQFSF(Y)	99%	20.85	25	20.85	1		646.7968	1,291.58	2	34,655.60	-0.004416	386	-3.416	396	4,252.57
(K)QNPNVDPQFSFYISPY(D)	92%	14	25	14	1		958.4446	1,914.87	2	20,436.00	-0.004262	386	-2.225	401	5,961.76
(K)QNPNVDPQFSFYISPYD(G)	100%	24.08	25	24.08	1		1,015.96	2,029.91	2	111443	0.005116	386	2.519	402	5,889.98
(K)QNPNVDPQFSFYISPYD(G)	100%	20.55	25	20.55	1		1,015.96	2,029.91	2	206735	0.00182	386	0.8962	402	5,873.02
(K)QNPNVDPQFSFYISPYDGK(S)	100%	39.6	25	39.6	2		1,108.52	2,215.02	2	50,822.80	0.0006761	386	0.3051	404	5,924.86
(K)QNPNVDPQFSFYISPYDGK(S)	100%	39.47	25	39.47	2		1,108.52	2,215.03	2	26,507.60	0.002628	386	1.186	404	6,167.66
(K)QNPNVDPQFSFYISPYDGK(S)	100%	39.08	25	39.08	2		1,108.52	2,215.03	2	6,175.92	0.005314	386	2.398	404	7,014.48
(K)QNPNVDPQFSFYISPYDGK(S)	100%	38.68	25	38.68	2		1,108.52	2,215.02	2	29,732.00	-0.003718	386	-1.678	404	6,613.50
(K)QNPNVDPQFSFYISPYDGK(S)	100%	38.08	25	38.08	2		1,108.52	2,215.02	2	30,072.70	-0.005672	386	-2.56	404	6,102.02
(K)QNPNVDPQFSFYISPYDGK(S)	100%	41.91	25	41.91	2		1,108.52	2,215.02	2	24,659.00	0.001652	386	0.7455	404	6,582.78
(K)QNPNVDPQFSFYISPYDGK(S)	100%	50.55	25	50.55	2		1,108.52	2,215.02	2	112827	0.0001881	386	0.08486	404	5,162.18
(K)QNPNVDPQFSFYISPYDGK(S)	100%	36.09	25	36.09	2		1,108.52	2,215.02	2	49,681.50	0.001164	386	0.5253	404	5,508.72
(K)QNPNVDPQFSFYISPYDGK(S)	100%	50.41	25	50.41	2		1,108.52	2,215.02	2	51,395.50	0.0004321	386	0.195	404	5,651.39
(K)QNPNVDPQFSFYISPYDGK(S)	100%	35.47	25	35.47	2		1,108.52	2,215.02	2	31,733.70	0.001164	386	0.5253	404	6,692.24
(K)QNPNVDPQFSFYISPYDGK(S)	100%	43.51	25	43.51	2		739.3477	2,215.02	3	89,992.10	-0.001047	386	-0.4724	404	3,691.12
(K)QNPNVDPQFSFYISPYDGK(S)	100%	42.78	25	42.78	2		739.3477	2,215.02	3	36,712.10	-0.00123	386	-0.555	404	4,979.29
(K)QNPNVDPQFSFYISPYDGK(S)	100%	48.41	25	48.41	2		1,108.52	2,215.02	2	171524	0.001652	386	0.7455	404	5,907.05
(K)QNPNVDPQFSFYISPYDGK(S)	100%	51.41	25	51.41	2		1,108.52	2,215.02	2	27,212.70	0.001408	386	0.6354	404	6,084.01
(K)QNPNVDPQFSFYISPYDGK(S)	100%	50.82	25	50.82	2		1,108.52	2,215.02	2	18,070.20	-0.0007899	386	-0.3565	404	6,800.52
(K)QNPNVDPQFSFYISPYDGK(S)	100%	53.1	25	53.1	2		1,108.52	2,215.02	2	31,588.50	0.0006761	386	0.3051	404	6,068.25
(K)QNPNVDPQFSFYISPYDGK(S)	100%	53.78	25	53.78	2		739.3486	2,215.02	3	40,606.90	0.001518	386	0.685	404	4,145.00
(K)QNPNVDPQFSFYISPYDGK(S)	100%	64.02	25	64.02	2		1,108.52	2,215.02	2	41,722.40	0.0001881	386	0.08486	404	5,941.99
(K)QNPNVDPQFSFYISPYDGK(S)	100%	56.76	25	56.76	2		1,108.52	2,215.02	2	32,928.60	-0.0002999	386	-0.1354	404	6,518.74
(K)QNPNVDPQFSFYISPYDGK(S)	100%	56.87	25	56.87	2		1,108.52	2,215.02	2	40,233.50	-0.0002999	386	-0.1354	404	6,405.57
(K)QNPNVDPQFSFYISPYDGK(S)	100%	52.11	25	52.11	2		1,108.52	2,215.02	2	7,820.40	0.001896	386	0.8556	404	7,313.91
(K)QNPNVDPQFSFYISPYDGK(S)	100%	56.39	25	56.39	2		1,108.52	2,215.02	2	28,638.90	-0.0007899	386	-0.3565	404	6,152.00
(K)QNPNVDPQFSFYISPYDGK(S)	100%	52.93	25	52.93	2		1,108.52	2,215.02	2	15,216.70	0.001896	386	0.8556	404	6,877.59
(K)QNPNVDPQFSFYISPYDGK(S)	100%	63.41	25	63.41	2		1,108.52	2,215.02	2	40,132.60	0.0004321	386	0.195	404	6,283.13
(K)QNPNVDPQFSFYISPYDGK(S)	100%	54.24	25	54.24	2		1,108.52	2,215.02	2	50,902.70	-0.001278	386	-0.5767	404	5,701.62
(K)QNPNVDPQFSFYISPYDGK(S)	100%	50.62	25	50.62	2		1,108.52	2,215.02	2	49,980.20	-0.001522	386	-0.6868	404	5,444.08
(K)QNPNVDPQFSFYISPYDGK(S)	100%	55.31	25	55.31	2		1,108.52	2,215.02	2	68,538.60	0.001896	386	0.8556	404	5,375.86
(K)QNPNVDPQFSFYISPYDGK(S)	100%	50.77	25	50.77	2		1,108.52	2,215.02	2	37,961.00	-0.002254	386	-1.017	404	4,523.73
(K)QNPNVDPQFSFYISPYDGK(S)	100%	56.19	25	56.19	2		1,108.52	2,215.02	2	32,391.20	0.00214	386	0.9657	404	6,503.40
(K)QNPNVDPQFSFYISPYDGK(S)	100%	53.45	25	53.45	2		1,108.52	2,215.02	2	22,896.80	-0.001522	386	-0.6868	404	6,184.21
(K)QNPNVDPQFSFYISPYDGK(S)	100%	52.14	25	52.14	2		1,108.52	2,215.02	2	30,634.30	-0.00201	386	-0.907	404	6,052.35
(K)QNPNVDPQFSFYISPYDGK(S)	100%	49.11	25	49.11	2		1,108.52	2,215.03	2	25,772.40	0.003362	386	1.517	404	6,659.57
(K)QNPNVDPQFSFYISPYDGK(S)	100%	53.01	25	53.01	2		1,108.52	2,215.02	2	18,399.10	-0.00201	386	-0.907	404	7,298.24
(K)QNPNVDPQFSFYISPYDGK(S)	100%	64.01	25	64.01	2		1,108.52	2,215.02	2	25,483.80	0.0006761	386	0.3051	404	6,135.40
(K)QNPNVDPQFSFYISPYDGK(S)	100%	50.43	25	50.43	2		1,108.52	2,215.03	2	34,629.40	0.003362	386	1.517	404	6,234.15
(K)QNPNVDPQFSFYISPYDGK(S)	100%	61.78	25	61.78	2		1,108.52	2,215.02	2	29,919.40	0.0009201	386	0.4152	404	6,598.41
(K)QNPNVDPQFSFYISPYDGK(S)	100%	50.45	25	50.45	2		1,108.52	2,215.03	2	28,892.40	0.003362	386	1.517	404	6,674.91
(K)QNPNVDPQFSFYISPYDGK(S)	100%	63.71	25	63.71	2		1,108.52	2,215.02	2	27,032.30	0.0009201	386	0.4152	404	6,118.52
(K)QNPNVDPQFSFYISPYDGK(S)	100%	65.1	25	65.1	2		1,108.52	2,215.02	2	34,902.50	0.0009201	386	0.4152	404	5,976.25
(K)QNPNVDPQFSFYISPYDGK(S)	100%	65.92	25	65.92	2		1,108.52	2,215.02	2	37,877.90	0.0009201	386	0.4152	404	6,456.41
(K)QNPNVDPQFSFYISPYDGK(S)	100%	67.06	25	67.06	2		1,108.52	2,215.02	2	679670	0.0009201	386	0.4152	404	4,875.42
(K)QNPNVDPQFSFYISPYDGK(S)	100%	65.42	25	65.42	2		1,108.52	2,215.02	2	45,121.80	-0.0005459	386	-0.2464	404	5,776.72
(K)QNPNVDPQFSFYISPYDGK(S)	100%	62.54	25	62.54	2		1,108.52	2,215.02	2	38,414.60	0.001896	386	0.8556	404	6,250.23
(K)QNPNVDPQFSFYISPYDGK(S)	100%	74.2	25	74.2	2		1,108.52	2,215.02	2	3486440	0.0004321	386	0.195	404	4,841.46
(K)QNPNVDPQFSFYISPYDGK(S)	100%	36.04	25	36.04	2		1,108.52	2,215.02	2	30,628.90	-0.003718	386	-1.678	404	6,534.83
(K)QNPNVDPQFSFYISPYDGK(S)	100%	62.38	25	62.38	2		1,108.52	2,215.02	2	30,390.40	0.002384	386	1.076	404	6,217.03
(K)QNPNVDPQFSFYISPYDGK(S)	100%	71.43	25	71.43	2		1,108.52	2,215.02	2	17,566.60	-0.001034	386	-0.4666	404	6,784.97
(K)QNPNVDPQFSFYISPYDGK(S)	100%	77.96	25	77.96	2		1,108.52	2,215.02	2	117868	0.0001881	386	0.08486	404	5,130.10
(K)QNPNVDPQFSFYISPYDGK(S)	100%	62.13	25	62.13	2		1,108.52	2,215.02	2	143028	-0.001522	386	-0.6868	404	5,114.85
(K)QNPNVDPQFSFYISPYDGK(S)	100%	63.55	25	63.55	2		1,108.52	2,215.02	2	41,597.20	-0.001522	386	-0.6868	404	5,667.45
(K)QNPNVDPQFSFYISPYDGK(S)	100%	61.87	25	61.87	2		1,108.52	2,215.02	2	28,811.20	-0.002254	386	-1.017	404	6,644.20
(K)QNPNVDPQFSFYISPYDGK(S)	100%	74.59	25	74.59	2		1,108.52	2,215.02	2	50,155.20	-0.0002999	386	-0.1354	404	5,525.01
(K)QNPNVDPQFSFYISPYDGK(S)	100%	74.31	25	74.31	2		1,108.52	2,215.02	2	22,590.00	0.001408	386	0.6354	404	6,200.49
(K)QNPNVDPQFSFYISPYDGK(S)	100%	56.97	25	56.97	2		1,108.52	2,215.02	2	46,086.00	-0.002742	386	-1.237	404	5,684.84
(K)QNPNVDPQFSFYISPYDGK(S)	100%	64.06	25	64.06	2		1,108.52	2,215.02	2	33,721.10	-0.002254	386	-1.017	404	6,009.09
(K)QNPNVDPQFSFYISPYDGK(S)	100%	65.34	25	65.34	2		1,108.52	2,215.02	2	87,788.40	-0.00201	386	-0.907	404	5,227.72
(K)QNPNVDPQFSFYISPYDGK(S)	100%	66.56	25	66.56	2		1,108.52	2,215.02	2	232042	-0.00201	386	-0.907	404	5,014.22
(K)QNPNVDPQFSFYISPYDGK(S)	100%	66.81	25	66.81	2		1,108.52	2,215.02	2	50,246.70	-0.002254	386	-1.017	404	5,795.65
(K)QNPNVDPQFSFYISPYDGK(S)	100%	62.07	25	62.07	2		1,108.52	2,215.03	2	54,196.90	0.003606	386	1.627	404	5,493.76
(K)QNPNVDPQFSFYISPYDGK(S)	100%	60.06	25	60.06	2		1,108.52	2,215.02	2	18,512.10	-0.002742	386	-1.237	404	6,831.14
(K)QNPNVDPQFSFYISPYDGK(S)	100%	45.84	25	45.84	2		1,108.52	2,215.02	2	13,763.80	-0.004696	386	-2.119	404	6,929.98
(K)QNPNVDPQFSFYISPYDGK(S)	100%	77.2	25	77.2	2		1,108.52	2,215.02	2	53,834.10	-0.0002999	386	-0.1354	404	5,717.93
(K)QNPNVDPQFSFYISPYDGK(S)	100%	63.58	25	63.58	2		1,108.52	2,215.02	2	33,500.80	-0.002742	386	-1.237	404	5,991.86
(K)QNPNVDPQFSFYISPYDGK(S)	100%	64.35	25	64.35	2		1,108.52	2,215.03	2	479294	0.004094	386	1.847	404	4,943.26
(K)QNPNVDPQFSFYISPYDGK(S)	100%	78.39	25	78.39	2		1,108.52	2,215.02	2	22,546.60	-0.0007899	386	-0.3565	404	6,567.62
(K)QNPNVDPQFSFYISPYDGK(S)	100%	66.29	25	66.29	2		1,108.52	2,215.02	2	1.06E+07	-0.002498	386	-1.127	404	4,825.97
(K)QNPNVDPQFSFYISPYDGK(S)	100%	66.66	25	66.66	2		1,108.52	2,215.02	2	20,109.50	-0.002742	386	-1.237	404	6,769.52
(K)QNPNVDPQFSFYISPYDGK(S)	100%	57.48	25	57.48	2		1,108.52	2,215.02	2	37,085.70	-0.00323	386	-1.458	404	5,831.62
(K)QNPNVDPQFSFYISPYDGK(S)	100%	81.44	25	81.44	2		1,108.52	2,215.02	2	12,842.30	-0.00005594	386	-0.02524	404	6,914.92
(K)QNPNVDPQFSFYISPYDGK(S)	100%	67.66	25	67.66	2		1,108.52	2,215.02	2	28,030.40	-0.002742	386	-1.237	404	6,439.50
(K)QNPNVDPQFSFYISPYDGK(S)	100%	81.7	25	81.7	2		1,108.52	2,215.02	2	40,176.20	-0.00005594	386	-0.02524	404	6,301.08
(K)QNPNVDPQFSFYISPYDGK(S)	100%	79.02	25	79.02	2		1,108.52	2,215.02	2	1565840	0.0009201	386	0.4152	404	4,858.43
(K)QNPNVDPQFSFYISPYDGK(S)	100%	68.36	25	68.36	2		1,108.52	2,215.03	2	130463	0.004094	386	1.847	404	5,889.89
(K)QNPNVDPQFSFYISPYDGK(S)	100%	69.86	25	69.86	2		1,108.52	2,215.02	2	63,136.70	-0.002498	386	-1.127	404	5,427.84
(K)QNPNVDPQFSFYISPYDGK(S)	100%	77.13	25	77.13	2		1,108.52	2,215.02	2	50,517.10	-0.001278	386	-0.5767	404	5,477.82
(K)QNPNVDPQFSFYISPYDGK(S)	100%	61.92	25	61.92	2		1,108.52	2,215.02	2	16,489.90	-0.002986	386	-1.347	404	6,722.75
(K)QNPNVDPQFSFYISPYDGK(S)	100%	81.87	25	81.87	2		1,108.52	2,215.02	2	28,697.30	-0.001034	386	-0.4666	404	6,422.72
(K)QNPNVDPQFSFYISPYDGK(S)	100%	65.55	25	65.55	2		1,108.52	2,215.02	2	68,542.50	-0.002986	386	-1.347	404	5,411.29
(K)QNPNVDPQFSFYISPYDGK(S)	100%	77.83	25	77.83	2		1,108.52	2,215.02	2	14,101.20	-0.001522	386	-0.6868	404	6,898.71
(K)QNPNVDPQFSFYISPYDGK(S)	100%	49.15	25	49.15	2		1,108.52	2,215.02	2	32,249.70	-0.005428	386	-2.449	404	6,488.13
(K)QNPNVDPQFSFYISPYDGK(S)	100%	74.04	25	74.04	2		1,108.52	2,215.02	2	44,311.00	-0.002498	386	-1.127	404	5,873.21
(K)QNPNVDPQFSFYISPYDGK(S)	100%	66.21	25	66.21	2		1,108.52	2,215.03	2	26,554.30	0.00507	386	2.288	404	6,754.35
(K)QNPNVDPQFSFYISPYDGK(S)	100%	79.01	25	79.01	2		1,108.52	2,215.02	2	40,688.00	-0.002254	386	-1.017	404	5,634.48
(K)QNPNVDPQFSFYISPYDGK(S)	100%	83.43	25	83.43	2		1,108.52	2,215.02	2	104830	-0.0005459	386	-0.2464	404	5,180.01
(K)QNPNVDPQFSFYISPYDGK(S)	100%	43.79	25	43.79	2		1,108.51	2,215.01	2	636326	-0.00909	386	-4.102	404	4,928.09
(K)QNPNVDPQFSFYISPYDGK(S)	100%	84.47	25	84.47	2		1,108.52	2,215.02	2	67,713.30	-0.0007899	386	-0.3565	404	5,358.52
(K)QNPNVDPQFSFYISPYDGK(S)	100%	76.54	25	76.54	2		1,108.52	2,215.02	2	2.84E+07	-0.002742	386	-1.237	404	4,810.08
(K)QNPNVDPQFSFYISPYDGK(S)	100%	81.43	25	81.43	2		1,108.52	2,215.02	2	31,431.50	-0.002254	386	-1.017	404	5,959.36
(K)QNPNVDPQFSFYISPYDGK(S)	100%	70.64	25	70.64	2		1,108.52	2,215.02	2	20,301.90	-0.00494	386	-2.229	404	6,739.43
(K)QNPNVDPQFSFYISPYDGK(S)	100%	70.76	25	70.76	2		1,108.52	2,215.02	2	20,220.20	-0.003964	386	-1.789	404	6,815.71
(K)QNPNVDPQFSFYISPYDGK(S)	100%	46.79	25	46.79	2		1,108.52	2,215.03	2	7,619.70	0.01069	386	4.822	404	6,965.66
(K)QNPNVDPQFSFYISPYDGK(S)	100%	71.16	25	71.16	2		1,108.52	2,215.02	2	57,486.20	-0.004452	386	-2.009	404	5,741.03
(K)QNPNVDPQFSFYISPYDGK(S)	100%	85.55	25	85.55	2		1,108.52	2,215.02	2	15,005.60	-0.001278	386	-0.5767	404	6,846.40
(K)QNPNVDPQFSFYISPYDGK(S)	100%	60.14	25	60.14	2		1,108.52	2,215.02	2	29,890.30	-0.005916	386	-2.67	404	6,629.15
(K)QNPNVDPQFSFYISPYDGK(S)	100%	81.7	25	81.7	2		1,108.52	2,215.03	2	32,004.20	0.004094	386	1.847	404	6,370.52
(K)QNPNVDPQFSFYISPYDGK(S)	100%	84.72	25	84.72	2		1,108.52	2,215.03	2	42,232.40	0.003118	386	1.407	404	5,587.90
(K)QNPNVDPQFSFYISPYDGK(S)	100%	78.12	25	78.12	2		1,108.52	2,215.02	2	60,201.30	-0.003718	386	-1.678	404	5,603.37
(K)QNPNVDPQFSFYISPYDGK(S)	100%	78.42	25	78.42	2		1,108.52	2,215.02	2	29,693.30	-0.003718	386	-1.678	404	6,352.91
(K)QNPNVDPQFSFYISPYDGK(S)	100%	88.39	25	88.39	2		1,108.52	2,215.02	2	7.90E+07	0.001408	386	0.6354	404	4,778.49
(K)QNPNVDPQFSFYISPYDGK(S)	100%	74.38	25	74.38	2		1,108.52	2,215.02	2	64,851.90	-0.00494	386	-2.229	404	5,619.21
(K)QNPNVDPQFSFYISPYDGK(S)	100%	88.53	25	88.53	2		1,108.52	2,215.02	2	7.83E+07	-0.001034	386	-0.4666	404	4,794.18
(K)QNPNVDPQFSFYISPYDGK(S)	100%	77.94	25	77.94	2		1,108.52	2,215.03	2	164904	0.004826	386	2.178	404	5,084.05
(K)QNPNVDPQFSFYISPYDGK(S)	100%	63.14	25	63.14	2		1,108.52	2,215.02	2	14,650.00	-0.006648	386	-3	404	6,862.15
(K)QNPNVDPQFSFYISPYDGK(S)	100%	81.64	25	81.64	2		1,108.52	2,215.02	2	52,484.20	-0.00323	386	-1.458	404	5,392.87
(K)QNPNVDPQFSFYISPYDGK(S)	100%	90.19	25	90.19	2		1,108.52	2,215.02	2	532962	0.0009201	386	0.4152	404	4,959.90
(K)QNPNVDPQFSFYISPYDGK(S)	100%	83.29	25	83.29	2		1,108.52	2,215.02	2	34,960.40	-0.003474	386	-1.568	404	6,267.16
(K)QNPNVDPQFSFYISPYDGK(S)	100%	72.11	25	72.11	2		1,108.52	2,215.02	2	27,883.60	-0.006648	386	-3	404	6,707.85
(K)QNPNVDPQFSFYISPYDGK(S)	100%	80.09	25	80.09	2		1,108.52	2,215.02	2	42,759.70	-0.00494	386	-2.229	404	6,335.37
(K)QNPNVDPQFSFYISPYDGK(S)	100%	81.3	25	81.3	2		1,108.52	2,215.02	2	17,400.60	-0.004208	386	-1.899	404	6,551.69
(K)QNPNVDPQFSFYISPYDGK(S)	100%	63.9	25	63.9	2		1,108.51	2,215.01	2	36,027.90	-0.01739	386	-7.847	404	6,472.32
(K)QNPNVDPQFSFYISPYDGK(S)	100%	94.25	25	94.25	2		1,108.52	2,215.02	2	69,601.10	-0.0002999	386	-0.1354	404	5,293.74
(K)QNPNVDPQFSFYISPYDGK(S)	100%	20.08	25	20.08	2		739.3485	2,215.02	3	10,047.80	0.001152	386	0.5199	404	5,813.74
(K)QNPNVDPQFSFYISPYDGK(S)	100%	87.11	25	87.11	2		1,108.52	2,215.02	2	81,593.70	-0.003474	386	-1.568	404	5,326.36
(K)QNPNVDPQFSFYISPYDGK(S)	100%	84.56	25	84.56	2		1,108.52	2,215.02	2	161828	-0.003964	386	-1.789	404	5,099.71
(K)QNPNVDPQFSFYISPYDGK(S)	100%	73.47	25	73.47	2		1,108.51	2,215.01	2	10,207.70	-0.01226	386	-5.534	404	6,946.17
(K)QNPNVDPQFSFYISPYDGK(S)	100%	98.69	25	98.69	2		1,108.52	2,215.02	2	96,410.00	-0.00005594	386	-0.02524	404	5,195.76
(K)QNPNVDPQFSFYISPYDGK(S)	100%	93.57	25	93.57	2		1,108.52	2,215.02	2	30,358.20	-0.002254	386	-1.017	404	6,318.28
(K)QNPNVDPQFSFYISPYDGK(S)	100%	78.8	25	78.8	2		1,108.51	2,215.01	2	48,407.00	-0.01007	386	-4.542	404	5,459.63
(K)QNPNVDPQFSFYISPYDGK(S)	100%	77.07	25	77.07	2		1,108.52	2,215.03	2	56,406.40	0.009954	386	4.492	404	7,282.70
(K)QNPNVDPQFSFYISPYDGK(S)	100%	80.11	25	80.11	2		1,108.51	2,215.01	2	57,469.00	-0.008846	386	-3.992	404	5,343.13
(K)QNPNVDPQFSFYISPYDGK(S)	100%	102.72	25	102.72	2		1,108.52	2,215.02	2	143498	0.0004321	386	0.195	404	5,031.04
(K)QNPNVDPQFSFYISPYDGK(S)	100%	93.63	25	93.63	2		1,108.52	2,215.02	2	43,442.50	-0.002498	386	-1.127	404	5,758.10
(K)QNPNVDPQFSFYISPYDGK(S)	99%	90.03	25	90.03	2		1,108.52	2,215.02	2	362294	-0.003964	386	-1.789	404	4,763.09
(K)QNPNVDPQFSFYISPYDGK(S)	99%	98.46	25	98.46	2		1,108.52	2,215.02	2	79,331.40	-0.002498	386	-1.127	404	5,243.52
(K)QNPNVDPQFSFYISPYDGK(S)	99%	103.99	25	103.99	2		1,108.52	2,215.02	2	274738	-0.001522	386	-0.6868	404	4,996.40
(K)QNPNVDPQFSFYISPYDGK(S)	99%	110.69	25	110.69	2		1,108.52	2,215.02	2	30,713.60	0.001896	386	0.8556	404	6,389.15
(K)QNPNVDPQFSFYISPYDGK(S)	99%	115.42	25	115.42	2		1,108.52	2,215.02	2	61,683.60	-0.002254	386	-1.017	404	5,276.04
(K)QNPNVDPQFSFYISPYDGK(S)	99%	115.44	25	115.44	2		1,108.52	2,215.02	2	77,115.30	-0.002254	386	-1.017	404	5,211.90
(K)QNPNVDPQFSFYISPYDGK(S)	98%	115.39	25	115.39	2		1,108.52	2,215.02	2	81,291.20	-0.002742	386	-1.237	404	5,145.45
(K)QNPNVDPQFSFYISPYDGK(S)	98%	120.36	25	120.36	2		1,108.52	2,215.02	2	73,338.00	-0.001522	386	-0.6868	404	5,258.88
(K)QNPNVDPQFSFYISPYDGK(S)	98%	115.46	25	115.46	2		1,108.52	2,215.02	2	61,862.10	-0.00323	386	-1.458	404	5,309.40
(K)QNPNVDPQFSFYISPYDGK(S)	97%	15.04	25	15.04	2		1,108.52	2,215.02	2	5,377.84	-0.003474	386	-1.568	404	7,344.63
(K)QNPNVDPQFSFYISPYDGKSTLIIGGISK(S)	100%	58.65	25	58.65	2		1,062.54	3,184.61	3	73,322.50	-0.0002929	386	-0.09196	414	5,524.79
(K)QNPNVDPQFSFYISPYDGKSTLIIGGISK(S)	100%	58.11	25	58.11	2		1,062.54	3,184.61	3	216165	0.001171	386	0.3676	414	5,477.44
(K)QNPNVDPQFSFYISPYDGKSTLIIGGISK(S)	100%	53.32	25	53.32	2		1,062.54	3,184.61	3	57,879.50	-0.002123	386	-0.6664	414	5,443.86
(K)QNPNVDPQFSFYISPYDGKSTLIIGGISK(S)	100%	57.93	25	57.93	2		1,062.54	3,184.61	3	71,065.50	0.003736	386	1.173	414	5,493.57
(K)QNPNVDPQFSFYISPYDGKSTLIIGGISK(S)	100%	51.41	25	51.41	2		1,062.55	3,184.61	3	31,422.90	0.005566	386	1.747	414	5,508.94
(K)QNPNVDPQFSFYISPYDGKSTLIIGGISK(S)	100%	49.82	25	49.82	2		1,062.54	3,184.60	3	1811800	-0.004322	386	-1.357	414	5,459.28
(K)QNPNVDPQFSFYISPYDGKSTLIIGGISK(S)	100%	64.01	25	64.01	2		1,062.54	3,184.60	3	360544	-0.00359	386	-1.127	414	5,540.07
(K)QNPNVDPQFSFYISPYDGKSTLIIGGISK(S)	100%	28.42	25	28.42	2		1,062.54	3,184.59	3	7,115.53	-0.01897	386	-5.955	414	5,661.49
(K)QNPNVDPQFSFYISPYDGKSTLIIGGISK(S)	100%	59.62	25	59.62	2		1,062.54	3,184.59	3	16,190.90	-0.01458	386	-4.576	414	6,353.24
(K)QNPNVDPQFSFYISPYDGKSTLIIGGISK(S)	100%	18.76	25	18.76	2		1,062.54	3,184.61	3	7,312.67	-0.0002929	386	-0.09196	414	6,243.50
(N)PNVDPQFSFYISPYDGK(S)	100%	72.57	25	68.91	1		987.4687	1,972.92	2	31,257.10	0.001956	388	0.9909	404	4,885.71
(N)PNVDPQFSFYISPYDGK(S)	99%	94.42	25	94.42	1		987.4698	1,972.93	2	69,374.80	0.004154	388	2.104	404	4,867.31
(N)VDPQFSFYISPYDGK(S)	100%	81.97	25	81.97	1		881.9198	1,761.83	2	170498	-0.0001219	390	-0.06917	404	4,774.94
(N)VDPQFSFYISPYDGK(S)	100%	81.3	25	81.3	1		881.9184	1,761.82	2	36,986.90	-0.00293	390	-1.662	404	4,758.09
(N)VDPQFSFYISPYDGKSTLIIGGISK(S)	100%	45.93	25	45.93	1		911.4754	2,731.40	3	14,191.90	-0.006889	390	-2.521	414	5,495.84
(V)DPQFSFYISPYDGK(S)	100%	65.14	25	65.14	1		832.3882	1,662.76	2	44,287.10	0.005046	391	3.033	404	4,824.94
(D)PQFSFYISPYDGK(S)	100%	40.11	25	40.11	1		774.873	1,547.73	2	10,602.70	0.00165	392	1.065	404	5,984.09
(D)PQFSFYISPYDGK(S)	100%	35.73	25	34.34	1		774.8722	1,547.73	2	35,673.80	0.00006206	392	0.04007	404	5,461.06
(D)PQFSFYISPYDGK(S)	100%	33.34	25	33.34	1		774.872	1,547.73	2	32,775.30	-0.0003039	392	-0.1963	404	5,029.83
(D)PQFSFYISPYDGK(S)	100%	34.98	25	34.98	1		774.8729	1,547.73	2	11,611.60	0.001528	392	0.9866	404	5,953.13
(D)PQFSFYISPYDGK(S)	100%	53.94	25	53.94	1		774.8724	1,547.73	2	31,701.70	0.0005521	392	0.3565	404	4,975.24
(D)PQFSFYISPYDGK(S)	100%	54.09	25	54.09	1		774.8724	1,547.73	2	16,253.60	0.0005521	392	0.3565	404	5,442.35
(D)PQFSFYISPYDGK(S)	100%	52.14	25	52.14	1		774.8718	1,547.73	2	31,994.70	-0.0007919	392	-0.5113	404	4,874.53
(D)PQFSFYISPYDGK(S)	100%	58.62	25	58.62	1		774.8721	1,547.73	2	16,176.80	-0.0001819	392	-0.1175	404	5,385.13
(D)PQFSFYISPYDGK(S)	100%	67.29	25	65.23	1		774.8721	1,547.73	2	23,497.80	-0.00005994	392	-0.0387	404	5,241.55
(D)PQFSFYISPYDGK(S)	100%	63.61	25	62.6	1		774.8721	1,547.73	2	251572	-0.0001819	392	-0.1175	404	4,637.68
(D)PQFSFYISPYDGK(S)	100%	72.51	25	72.51	1		774.8723	1,547.73	2	176140	0.0001841	392	0.1188	404	4,700.67
(D)PQFSFYISPYDGK(S)	100%	36.98	25	36.98	1		774.8736	1,547.73	2	41,600.50	0.00287	392	1.853	404	4,945.67
(D)PQFSFYISPYDGK(S)	100%	62.23	25	62.23	1		774.8726	1,547.73	2	14,602.80	0.0007961	392	0.514	404	5,425.34
(D)PQFSFYISPYDGK(S)	100%	62.71	25	62.71	1		774.8718	1,547.73	2	18,729.90	-0.0006699	392	-0.4326	404	5,012.94
(D)PQFSFYISPYDGK(S)	100%	57.9	25	57.9	1		774.873	1,547.73	2	16,410.80	0.00165	392	1.065	404	5,519.22
(D)PQFSFYISPYDGK(S)	100%	64.77	25	64.77	1		774.8718	1,547.73	2	16,861.60	-0.0007919	392	-0.5113	404	5,347.68
(D)PQFSFYISPYDGK(S)	100%	74.38	25	74.38	1		774.8723	1,547.73	2	21,034.50	0.0003061	392	0.1976	404	5,187.88
(D)PQFSFYISPYDGK(S)	100%	35.86	25	35.86	1		774.8709	1,547.73	2	23,254.20	-0.0025	392	-1.614	404	5,868.71
(D)PQFSFYISPYDGK(S)	100%	65.04	25	65.04	1		774.8729	1,547.73	2	32,510.60	0.001406	392	0.9079	404	5,887.15
(D)PQFSFYISPYDGK(S)	100%	65.76	25	65.76	1		774.8729	1,547.73	2	16,982.50	0.001528	392	0.9866	404	5,497.82
(D)PQFSFYISPYDGK(S)	100%	60.35	25	60.35	1		774.8732	1,547.73	2	17,004.00	0.002016	392	1.302	404	5,313.13
(D)PQFSFYISPYDGK(S)	100%	75.96	25	75.96	1		774.8723	1,547.73	2	22,265.20	0.0003061	392	0.1976	404	5,211.36
(D)PQFSFYISPYDGK(S)	100%	65.69	25	65.69	1		774.8716	1,547.73	2	14,729.20	-0.001158	392	-0.7477	404	5,601.28
(D)PQFSFYISPYDGK(S)	100%	66.7	25	66.64	1		774.8715	1,547.73	2	17,367.90	-0.00128	392	-0.8264	404	5,260.55
(D)PQFSFYISPYDGK(S)	100%	63.91	25	63.91	1		774.8732	1,547.73	2	15,151.80	0.002138	392	1.381	404	5,368.07
(D)PQFSFYISPYDGK(S)	100%	75.39	25	75.39	1		774.8721	1,547.73	2	16,553.90	-0.0001819	392	-0.1175	404	5,279.32
(D)PQFSFYISPYDGK(S)	100%	78.06	25	76.82	1		774.8721	1,547.73	2	172369	-0.00005994	392	-0.0387	404	4,734.39
(D)PQFSFYISPYDGK(S)	100%	77.41	25	76.62	1		774.8722	1,547.73	2	192927	0.00006206	392	0.04007	404	4,718.91
(D)PQFSFYISPYDGK(S)	100%	74.66	25	74.07	1		774.8718	1,547.73	2	246106	-0.0006699	392	-0.4326	404	4,622.43
(D)PQFSFYISPYDGK(S)	100%	32.54	25	32.54	1		774.8744	1,547.73	2	11,378.10	0.004458	392	2.879	404	6,288.70
(D)PQFSFYISPYDGK(S)	100%	68.53	25	68.53	1		774.8713	1,547.73	2	16,295.40	-0.001646	392	-1.063	404	5,155.76
(D)PQFSFYISPYDGK(S)	100%	70.02	25	70.02	1		774.8735	1,547.73	2	16,038.90	0.002748	392	1.774	404	5,332.04
(D)PQFSFYISPYDGK(S)	100%	70.19	25	70.19	1		774.8737	1,547.73	2	22,491.70	0.003114	392	2.011	404	5,296.58
(D)PQFSFYISPYDGK(S)	100%	84.6	25	80.52	1		774.8723	1,547.73	2	206031	0.0003061	392	0.1976	404	4,508.86
(D)PQFSFYISPYDGK(S)	100%	79.47	25	79.47	1		774.8727	1,547.73	2	190728	0.001162	392	0.7503	404	4,403.70
(D)PQFSFYISPYDGK(S)	100%	81.18	25	81.18	1		774.8726	1,547.73	2	184369	0.0007961	392	0.514	404	4,766.94
(D)PQFSFYISPYDGK(S)	100%	71.63	25	71.63	1		774.8737	1,547.73	2	17,334.30	0.002992	392	1.932	404	5,480.45
(D)PQFSFYISPYDGK(S)	100%	84.4	25	82.81	1		774.8721	1,547.73	2	1.06E+07	-0.00005994	392	-0.0387	404	4,419.19
(D)PQFSFYISPYDGK(S)	100%	72.54	25	72.54	1		774.8713	1,547.73	2	223315	-0.001768	392	-1.142	404	4,558.35
(D)PQFSFYISPYDGK(S)	100%	82.4	25	82.4	1		774.8718	1,547.73	2	228050	-0.0006699	392	-0.4326	404	4,653.11
(D)PQFSFYISPYDGK(S)	100%	82.39	25	80.79	1		774.8719	1,547.73	2	175250	-0.0004259	392	-0.275	404	4,750.22
(D)PQFSFYISPYDGK(S)	100%	83.36	25	83.36	1		774.8719	1,547.73	2	15,176.30	-0.0005479	392	-0.3538	404	5,647.43
(D)PQFSFYISPYDGK(S)	100%	70	25	70	1		774.8711	1,547.73	2	98,425.10	-0.002134	392	-1.378	404	4,825.05
(D)PQFSFYISPYDGK(S)	100%	77	25	77	1		774.8734	1,547.73	2	89,517.30	0.002504	392	1.617	404	4,685.13
(D)PQFSFYISPYDGK(S)	100%	84.34	25	84.34	1		774.8718	1,547.73	2	266624	-0.0006699	392	-0.4326	404	4,491.40
(D)PQFSFYISPYDGK(S)	100%	72.45	25	72.45	1		774.8709	1,547.73	2	39,624.30	-0.002622	392	-1.693	404	4,856.34
(D)PQFSFYISPYDGK(S)	100%	84.69	25	83.48	1		774.8719	1,547.73	2	2319030	-0.0004259	392	-0.275	404	4,437.62
(D)PQFSFYISPYDGK(S)	100%	79.47	25	78.1	1		774.8713	1,547.73	2	193369	-0.001646	392	-1.063	404	4,668.35
(D)PQFSFYISPYDGK(S)	100%	84.16	25	84.16	1		774.873	1,547.73	2	29,180.20	0.00165	392	1.065	404	4,923.20
(D)PQFSFYISPYDGK(S)	100%	88.29	25	88.29	1		774.872	1,547.73	2	510937	-0.0003039	392	-0.1963	404	4,473.76
(D)PQFSFYISPYDGK(S)	100%	66.82	25	66.82	1		774.8748	1,547.74	2	23,337.40	0.005312	392	3.43	404	4,994.93
(D)PQFSFYISPYDGK(S)	100%	85.43	25	85.43	1		774.8715	1,547.73	2	17,129.30	-0.00128	392	-0.8264	404	5,132.52
(D)PQFSFYISPYDGK(S)	100%	90.58	25	88.99	1		774.8722	1,547.73	2	672262	0.00006206	392	0.04007	404	4,455.32
(D)PQFSFYISPYDGK(S)	100%	84.18	25	82.8	1		774.8712	1,547.73	2	188122	-0.00189	392	-1.22	404	4,542.64
(D)PQFSFYISPYDGK(S)	100%	83.05	25	80.41	1		774.8711	1,547.73	2	15,686.80	-0.002134	392	-1.378	404	5,407.79
(D)PQFSFYISPYDGK(S)	100%	21.56	25	21.56	1		774.8735	1,547.73	2	8,493.85	0.002748	392	1.774	404	6,141.91
(D)PQFSFYISPYDGK(S)	100%	90.95	25	90.95	1		774.8727	1,547.73	2	162597	0.00104	392	0.6716	404	4,527.54
(D)PQFSFYISPYDGK(S)	100%	80.05	25	80.05	1		774.8745	1,547.73	2	47,371.80	0.00458	392	2.957	404	4,898.11
(D)PQFSFYISPYDGK(S)	100%	96	25	94.89	1		774.8718	1,547.73	2	141841	-0.0007919	392	-0.5113	404	4,585.12
(D)PQFSFYISPYDGK(S)	99%	95.65	25	94.05	1		774.8713	1,547.73	2	181217	-0.001768	392	-1.142	404	4,605.45
(D)PQFSFYISPYDGK(S)	99%	15.44	25	15.44	1		774.8718	1,547.73	2	9,594.12	-0.0006699	392	-0.4326	404	6,365.34
(D)PQFSFYISPYDGK(S)	98%	19.01	25	19.01	1		774.8688	1,547.72	2	10,649.20	-0.006652	392	-4.295	404	6,114.07
(D)PQFSFYISPYDGKSTLIIGGISK(S)	100%	54.25	25	54.25	1		840.113	2,517.32	3	15,252.60	0.00123	392	0.4884	414	5,386.24
(D)PQFSFYISPYDGKSTLIIGGISK(S)	100%	70.65	25	70.65	1		840.1129	2,517.32	3	19,551.40	0.001047	392	0.4158	414	5,369.52
(D)PQFSFYISPYDGKSTLIIGGISK(S)	100%	76.8	25	76.8	1		840.1125	2,517.32	3	43,545.70	-0.00005094	392	-0.02023	414	5,267.51
(D)PQFSFYISPYDGKSTLIIGGISK(S)	100%	79.04	25	79.04	1		840.1124	2,517.32	3	156420	-0.0004169	392	-0.1656	414	5,283.79
(D)PQFSFYISPYDGKSTLIIGGISK(S)	100%	86.33	25	86.33	1		840.1125	2,517.32	3	31,475.30	-0.0002339	392	-0.0929	414	5,300.28
(P)QFSFYISPYDGK(S)	100%	34.57	25	34.57	1		726.3466	1,450.68	2	32,518.40	0.001594	393	1.098	404	4,237.83
(Q)FSFYISPYDGK(S)	100%	39.89	25	39.89	1		662.3184	1,322.62	2	24,987.80	0.003796	394	2.868	404	4,239.51
(Q)FSFYISPYDGK(S)	100%	41.93	25	41.93	1		662.3174	1,322.62	2	50,275.10	0.001844	394	1.393	404	4,220.83
(Q)FSFYISPYDGK(S)	100%	55.32	25	55.32	1		662.3169	1,322.62	2	287617	0.0008681	394	0.6558	404	4,202.96
(Q)FSFYISPYDGK(S)	100%	46.3	25	46.3	1		662.3173	1,322.62	2	27,893.50	0.0016	394	1.209	404	4,259.29
(Q)FSFYISPYDGK(S)	100%	51.54	25	51.54	1		662.3171	1,322.62	2	71,354.50	0.001356	394	1.025	404	4,184.87
(F)SFYISPYDGK(S)	100%	38.09	25	38.09	1		588.7825	1,175.55	2	54,931.90	0.0004201	395	0.357	404	2,963.36
(F)SFYISPYDGK(S)	100%	27.11	25	27.11	1		588.782	1,175.55	2	16,511.50	-0.0004359	395	-0.3705	404	3,003.84
(F)SFYISPYDGK(S)	100%	29.67	25	29.67	1		588.7833	1,175.55	2	74,585.40	0.002006	395	1.705	404	2,980.34
(S)FYISPYDGK(S)	100%	31.02	25	31.02	1		545.2661	1,088.52	2	22,015.00	-0.0004179	396	-0.3836	404	2,811.55
(S)FYISPYDGK(S)	100%	28.46	25	28.46	1		545.2659	1,088.52	2	85,243.60	-0.0007839	396	-0.7195	404	2,793.55
(F)YISPYDGK(S)	99%	36.64	25	36.64	1		471.7317	941.4488	2	72,467.40	-0.0008039	397	-0.853	404	1,940.08
(F)YISPYDGK(S)	99%	24.64	25	19.38	1		471.732	941.4494	2	27,284.50	-0.0001939	397	-0.2058	404	1,960.98
(F)YISPYDGKSTLIIGGISK(S)	100%	45.47	25	45.47	1		638.0187	1,911.03	3	25,828.70	-0.001284	397	-0.6715	414	3,636.85
(Y)ISPYDGKSTLIIGGISK(S)	100%	54.47	25	54.47	1		583.665	1,747.97	3	22,638.80	0.0009191	398	0.5255	414	3,328.57
(Y)ISPYDGKSTLIIGGISK(S)	100%	58.01	25	52.1	1		583.6641	1,747.97	3	24,486.10	-0.001826	398	-1.044	414	3,309.77
(Y)DGKSTLIIGGISK(S)	100%	79.74	25	79.74	1		644.8772	1,287.74	2	18,379.20	-0.0003279	402	-0.2545	414	2,484.95
(D)GKSTLIIGGISK(S)	100%	77.57	25	77.57	1		587.3637	1,172.71	2	154278	-0.0003059	403	-0.2607	414	2,131.62
(D)GKSTLIIGGISK(S)	100%	88.9	25	88.9	1		587.3639	1,172.71	2	42,491.20	0.00006206	403	0.05287	414	2,148.93
(G)KSTLIIGGISK(S)	100%	50.03	25	48.65	1		558.849	1,115.68	2	42,682.90	-0.008224	404	-7.365	414	2,120.26
(K)STLIIGGISK(S)	100%	40.02	25	40.02	2		494.8056	987.5967	2	17,044.30	0.00004606	405	0.04659	414	4,892.89
(K)STLIIGGISK(S)	100%	39.56	25	39.56	2		494.806	987.5975	2	22,481.30	0.0008381	405	0.8477	414	3,884.50
(K)STLIIGGISK(S)	100%	39.48	25	39.48	2		494.8047	987.5948	2	19,134.70	-0.001846	405	-1.867	414	4,429.03
(K)STLIIGGISK(S)	100%	40.36	25	40.36	2		494.8058	987.5971	2	13,178.70	0.0004721	405	0.4775	414	5,020.51
(K)STLIIGGISK(S)	100%	40.39	25	40.39	2		494.8054	987.5963	2	30,639.80	-0.0003819	405	-0.3863	414	3,830.24
(K)STLIIGGISK(S)	100%	40.41	25	40.41	2		494.8057	987.5968	2	15,242.70	0.0001681	405	0.17	414	5,379.91
(K)STLIIGGISK(S)	100%	40.61	25	40.61	2		494.8055	987.5965	2	60,711.90	-0.0001999	405	-0.2022	414	3,395.80
(K)STLIIGGISK(S)	100%	40.7	25	40.7	2		494.8049	987.5953	2	12,832.30	-0.001358	405	-1.374	414	5,116.33
(K)STLIIGGISK(S)	100%	39.11	25	39.11	2		494.8055	987.5963	2	27,961.20	-0.0003219	405	-0.3257	414	3,849.07
(K)STLIIGGISK(S)	100%	40.76	25	40.76	2		494.8049	987.5953	2	16,066.30	-0.00142	405	-1.436	414	5,152.44
(K)STLIIGGISK(S)	100%	39.07	25	39.07	2		494.8054	987.5962	2	15,089.50	-0.0004439	405	-0.4491	414	5,702.08
(K)STLIIGGISK(S)	100%	38.98	25	38.98	2		494.8052	987.5958	2	20,991.30	-0.0008699	405	-0.88	414	4,503.51
(K)STLIIGGISK(S)	100%	40.97	25	40.97	2		494.8057	987.5969	2	16,965.50	0.0002281	405	0.2307	414	5,188.99
(K)STLIIGGISK(S)	100%	41.04	25	41.04	2		494.8066	987.5986	2	16,286.10	0.001938	405	1.96	414	5,095.80
(K)STLIIGGISK(S)	100%	38.73	25	38.73	2		494.8058	987.5971	2	12,101.20	0.0004121	405	0.4168	414	5,432.70
(K)STLIIGGISK(S)	100%	41.13	25	41.13	2		494.8054	987.5962	2	21,353.80	-0.0005039	405	-0.5098	414	4,484.25
(K)STLIIGGISK(S)	100%	38.66	25	38.66	2		494.8062	987.5978	2	11,677.50	0.001144	405	1.157	414	6,097.07
(K)STLIIGGISK(S)	100%	38.45	25	38.45	2		494.8023	987.59	2	18,243.50	-0.006668	405	-6.745	414	4,858.34
(K)STLIIGGISK(S)	100%	38.24	25	38.24	2		494.8052	987.5959	2	13,598.80	-0.0008099	405	-0.8193	414	5,259.45
(K)STLIIGGISK(S)	100%	41.7	25	41.7	2		494.8057	987.5968	2	18,600.20	0.0001061	405	0.1073	414	4,448.10
(K)STLIIGGISK(S)	100%	41.72	25	41.72	2		494.8057	987.5969	2	13,835.70	0.0002281	405	0.2307	414	5,296.14
(K)STLIIGGISK(S)	100%	38.04	25	38.04	2		494.8059	987.5973	2	20,617.70	0.0006561	405	0.6636	414	4,524.03
(K)STLIIGGISK(S)	100%	46.48	25	46.48	2		494.8057	987.5968	2	21,597.90	0.0001061	405	0.1073	414	4,875.53
(K)STLIIGGISK(S)	100%	47.07	25	47.07	2		494.8057	987.5968	2	33,629.30	0.0001061	405	0.1073	414	4,139.44
(K)STLIIGGISK(S)	100%	36.27	25	36.27	2		494.8057	987.5968	2	26,442.00	0.0001681	405	0.17	414	3,901.50
(K)STLIIGGISK(S)	100%	36.89	25	36.89	2		494.8056	987.5966	2	37,904.40	-0.00007594	405	-0.07682	414	3,629.90
(K)STLIIGGISK(S)	100%	46.39	25	46.39	2		494.8056	987.5967	2	21,397.40	-0.00001594	405	-0.01613	414	4,226.99
(K)STLIIGGISK(S)	100%	36.65	25	36.65	2		494.8055	987.5965	2	13,209.30	-0.0001379	405	-0.1395	414	5,312.68
(K)STLIIGGISK(S)	100%	36.34	25	36.34	2		494.8058	987.597	2	22,844.70	0.0003501	405	0.3541	414	3,954.18
(K)STLIIGGISK(S)	100%	31.71	25	31.71	2		494.8056	987.5967	2	19,856.40	-0.00001594	405	-0.01613	414	4,466.30
(K)STLIIGGISK(S)	100%	31.65	25	31.65	2		494.8056	987.5967	2	15,012.50	0.00004606	405	0.04659	414	5,649.93
(K)STLIIGGISK(S)	100%	34.76	25	34.76	2		494.8055	987.5965	2	27,531.80	-0.0001379	405	-0.1395	414	4,006.01
(K)STLIIGGISK(S)	100%	31.55	25	31.55	2		494.8056	987.5967	2	18,649.40	-0.00001594	405	-0.01613	414	5,002.76
(K)STLIIGGISK(S)	100%	34.15	25	34.15	2		494.8055	987.5965	2	25,872.00	-0.0001379	405	-0.1395	414	3,971.68
(K)STLIIGGISK(S)	100%	30.73	25	30.73	2		494.8056	987.5967	2	13,141.70	0.00004606	405	0.04659	414	5,875.47
(K)STLIIGGISK(S)	100%	46.24	25	46.24	2		494.8059	987.5972	2	23,900.20	0.0005341	405	0.5402	414	4,280.80
(K)STLIIGGISK(S)	100%	30.24	25	30.24	2		494.8056	987.5967	2	12,034.50	-0.00001594	405	-0.01613	414	5,840.99
(K)STLIIGGISK(S)	100%	33.41	25	33.41	2		494.8058	987.597	2	12,414.10	0.0003501	405	0.3541	414	6,180.07
(K)STLIIGGISK(S)	100%	43.77	25	43.77	2		494.8055	987.5963	2	34,906.20	-0.0003219	405	-0.3257	414	3,813.30
(K)STLIIGGISK(S)	100%	49.93	25	49.93	2		494.8056	987.5967	2	152412	-0.00001594	405	-0.01613	414	3,052.08
(K)STLIIGGISK(S)	100%	37.52	25	37.52	2		494.8054	987.5962	2	21,799.00	-0.0004439	405	-0.4491	414	4,751.04
(K)STLIIGGISK(S)	100%	31.82	25	31.82	2		494.8055	987.5965	2	21,946.70	-0.0001379	405	-0.1395	414	4,984.51
(K)STLIIGGISK(S)	100%	33.63	25	33.63	2		494.8058	987.5971	2	24,369.70	0.0004721	405	0.4775	414	4,104.59
(K)STLIIGGISK(S)	100%	45.53	25	45.53	2		494.8055	987.5963	2	54,134.30	-0.0003219	405	-0.3257	414	3,413.29
(K)STLIIGGISK(S)	100%	28.98	25	28.98	2		494.8056	987.5967	2	13,045.40	0.00004606	405	0.04659	414	5,977.88
(K)STLIIGGISK(S)	100%	46.15	25	46.15	2		494.8054	987.5963	2	112172	-0.0003819	405	-0.3863	414	4,699.13
(K)STLIIGGISK(S)	100%	42.77	25	42.77	2		494.8055	987.5964	2	42,694.40	-0.0002599	405	-0.2629	414	4,295.92
(K)STLIIGGISK(S)	100%	45.38	25	45.38	2		494.8054	987.5962	2	24,253.20	-0.0005039	405	-0.5098	414	4,155.99
(K)STLIIGGISK(S)	100%	51.53	25	51.53	2		494.8056	987.5967	2	56,898.50	-0.00001594	405	-0.01613	414	3,360.94
(K)STLIIGGISK(S)	100%	52.91	25	52.91	2		494.8056	987.5966	2	265707	-0.00007594	405	-0.07682	414	2,964.81
(K)STLIIGGISK(S)	100%	44.04	25	44.04	2		494.8055	987.5964	2	14,725.30	-0.0002599	405	-0.2629	414	5,416.09
(K)STLIIGGISK(S)	100%	28.1	25	28.1	2		494.8056	987.5967	2	13,889.00	-0.00001594	405	-0.01613	414	6,079.86
(K)STLIIGGISK(S)	100%	48.67	25	48.67	2		494.8058	987.597	2	22,259.20	0.0002901	405	0.2934	414	4,557.58
(K)STLIIGGISK(S)	100%	48.89	25	48.89	2		494.8057	987.5969	2	213268	0.0002281	405	0.2307	414	3,017.90
(K)STLIIGGISK(S)	100%	44.98	25	44.98	2		494.8055	987.5964	2	25,144.60	-0.0002599	405	-0.2629	414	4,024.20
(K)STLIIGGISK(S)	100%	25.56	25	25.56	2		494.8057	987.5968	2	13,596.50	0.0001681	405	0.17	414	5,362.44
(K)STLIIGGISK(S)	100%	29.66	25	29.66	2		494.8055	987.5965	2	19,173.20	-0.0001379	405	-0.1395	414	6,439.65
(K)STLIIGGISK(S)	100%	49.47	25	49.47	2		494.8057	987.5969	2	307386	0.0002281	405	0.2307	414	2,931.41
(K)STLIIGGISK(S)	100%	52.51	25	52.51	2		494.8056	987.5967	2	116922	-0.00001594	405	-0.01613	414	3,086.91
(K)STLIIGGISK(S)	100%	50.4	25	50.4	2		494.8055	987.5965	2	249175	-0.0001379	405	-0.1395	414	3,000.21
(K)STLIIGGISK(S)	100%	45.91	25	45.91	2		494.8055	987.5965	2	41,920.30	-0.0001999	405	-0.2022	414	3,663.94
(K)STLIIGGISK(S)	100%	22.48	25	22.48	2		494.8057	987.5968	2	10,058.30	0.0001061	405	0.1073	414	6,163.82
(K)STLIIGGISK(S)	100%	49.75	25	49.75	2		494.8057	987.5969	2	385927	0.0002281	405	0.2307	414	2,913.99
(K)STLIIGGISK(S)	100%	50.99	25	50.99	2		494.8055	987.5965	2	98,746.10	-0.0001379	405	-0.1395	414	3,170.65
(K)STLIIGGISK(S)	100%	33.12	25	33.12	2		494.8055	987.5964	2	24,866.20	-0.0002599	405	-0.2629	414	3,866.85
(K)STLIIGGISK(S)	100%	30.19	25	30.19	2		494.8058	987.5971	2	16,785.20	0.0004721	405	0.4775	414	5,038.86
(K)STLIIGGISK(S)	100%	32.97	25	32.97	2		494.8055	987.5964	2	17,256.50	-0.0002599	405	-0.2629	414	5,599.85
(K)STLIIGGISK(S)	100%	48.99	25	48.99	2		494.8055	987.5963	2	128748	-0.0003219	405	-0.3257	414	3,104.50
(K)STLIIGGISK(S)	100%	48.19	25	48.19	2		494.8054	987.5962	2	62,424.50	-0.0005039	405	-0.5098	414	3,309.22
(K)STLIIGGISK(S)	100%	48.82	25	48.82	2		494.8058	987.5971	2	173929	0.0004121	405	0.4168	414	2,725.21
(K)STLIIGGISK(S)	100%	43.47	25	43.47	2		494.8053	987.596	2	28,098.10	-0.0006259	405	-0.6332	414	4,042.04
(K)STLIIGGISK(S)	100%	50.8	25	50.8	2		494.8057	987.5969	2	1677580	0.0002281	405	0.2307	414	2,831.54
(K)STLIIGGISK(S)	100%	42.61	25	42.61	2		494.806	987.5974	2	26,074.90	0.0007781	405	0.787	414	4,245.15
(K)STLIIGGISK(S)	100%	48.75	25	48.75	2		494.8054	987.5962	2	23,438.20	-0.0004439	405	-0.4491	414	4,375.23
(K)STLIIGGISK(S)	100%	48.91	25	48.91	2		494.8054	987.5962	2	838974	-0.0005039	405	-0.5098	414	2,862.20
(K)STLIIGGISK(S)	100%	48.02	25	48.02	2		494.8055	987.5965	2	26,910.30	-0.0001999	405	-0.2022	414	3,989.04
(K)STLIIGGISK(S)	100%	30.73	25	30.73	2		494.8054	987.5962	2	14,459.40	-0.0005039	405	-0.5098	414	5,224.41
(K)STLIIGGISK(S)	100%	35.28	25	35.28	2		494.806	987.5975	2	11,890.60	0.0008381	405	0.8477	414	6,063.30
(K)STLIIGGISK(S)	100%	34.92	25	34.92	2		494.806	987.5974	2	10,879.10	0.0007781	405	0.787	414	6,047.52
(K)STLIIGGISK(S)	100%	52.77	25	52.77	2		494.8055	987.5965	2	25,617.20	-0.0001379	405	-0.1395	414	3,918.97
(K)STLIIGGISK(S)	100%	51.99	25	51.99	2		494.8057	987.5969	2	22,642.50	0.0002281	405	0.2307	414	4,263.23
(K)STLIIGGISK(S)	100%	30.71	25	30.71	2		494.8055	987.5965	2	83,072.00	-0.0001999	405	-0.2022	414	3,378.30
(K)STLIIGGISK(S)	100%	46.17	25	46.17	2		494.8053	987.596	2	68,310.50	-0.0006259	405	-0.6332	414	3,292.73
(K)STLIIGGISK(S)	100%	49.13	25	49.13	2		494.806	987.5974	2	173082	0.0007161	405	0.7243	414	3,034.14
(K)STLIIGGISK(S)	100%	49.29	25	49.29	2		494.8055	987.5964	2	83,771.10	-0.0002599	405	-0.2629	414	3,205.94
(K)STLIIGGISK(S)	100%	26.55	25	26.55	2		494.8059	987.5973	2	13,938.60	0.0005941	405	0.6009	414	5,516.72
(K)STLIIGGISK(S)	100%	52.83	25	52.83	2		494.8057	987.5969	2	71,216.80	0.0002281	405	0.2307	414	3,275.20
(K)STLIIGGISK(S)	100%	43.75	25	43.75	2		494.8061	987.5977	2	43,617.20	0.001022	405	1.034	414	3,566.92
(K)STLIIGGISK(S)	100%	47.52	25	47.52	2		494.8053	987.5961	2	95,612.80	-0.0005659	405	-0.5725	414	3,188.20
(K)STLIIGGISK(S)	100%	51.96	25	51.96	2		494.8054	987.5963	2	450228	-0.0003819	405	-0.3863	414	2,897.28
(K)STLIIGGISK(S)	100%	35.68	25	35.68	2		494.8061	987.5977	2	13,318.90	0.001022	405	1.034	414	6,228.87
(K)STLIIGGISK(S)	100%	50.3	25	50.3	2		494.806	987.5974	2	18,666.00	0.0007161	405	0.7243	414	4,966.80
(K)STLIIGGISK(S)	100%	28.55	25	28.55	2		494.8054	987.5962	2	14,167.80	-0.0004439	405	-0.4491	414	5,822.46
(K)STLIIGGISK(S)	100%	55.9	25	55.9	2		494.8056	987.5967	2	295080	-0.00001594	405	-0.01613	414	2,947.83
(K)STLIIGGISK(S)	100%	23.75	25	23.75	2		494.8056	987.5967	2	15,529.50	0.00004606	405	0.04659	414	5,467.74
(K)STLIIGGISK(S)	100%	48.21	25	48.21	2		494.8053	987.5961	2	108769	-0.0005659	405	-0.5725	414	3,120.39
(K)STLIIGGISK(S)	100%	53.72	25	53.72	2		494.8058	987.597	2	82,766.10	0.0002901	405	0.2934	414	3,223.56
(K)STLIIGGISK(S)	100%	28.44	25	28.44	2		494.806	987.5974	2	13,035.90	0.0007161	405	0.7243	414	5,398.44
(K)STLIIGGISK(S)	100%	51.58	25	51.58	2		494.8055	987.5964	2	19,604.90	-0.0002599	405	-0.2629	414	4,734.73
(K)STLIIGGISK(S)	100%	54.28	25	54.28	2		494.8057	987.5969	2	39,450.90	0.0002281	405	0.2307	414	3,431.07
(K)STLIIGGISK(S)	100%	42.89	25	42.89	2		494.8052	987.5959	2	47,770.80	-0.0008099	405	-0.8193	414	3,597.63
(K)STLIIGGISK(S)	100%	43.14	25	43.14	2		494.8053	987.596	2	26,931.90	-0.0006879	405	-0.6959	414	4,173.56
(K)STLIIGGISK(S)	100%	49.65	25	49.65	2		494.8053	987.5961	2	15,171.10	-0.0005659	405	-0.5725	414	5,277.26
(K)STLIIGGISK(S)	100%	52.89	25	52.89	2		494.8054	987.5962	2	100722	-0.0004439	405	-0.4491	414	3,153.76
(K)STLIIGGISK(S)	100%	24.31	25	24.31	2		494.8055	987.5965	2	13,914.30	-0.0001379	405	-0.1395	414	5,169.28
(K)STLIIGGISK(S)	100%	30.68	25	30.68	2		494.8061	987.5976	2	12,249.30	0.0009001	405	0.9104	414	5,857.16
(K)STLIIGGISK(S)	100%	27.14	25	27.14	2		494.8055	987.5965	2	24,799.70	-0.0001999	405	-0.2022	414	3,936.22
(K)STLIIGGISK(S)	100%	24.54	25	24.54	2		494.8058	987.597	2	47,242.80	0.0002901	405	0.2934	414	2,176.76
(K)STLIIGGISK(S)	100%	26.28	25	26.28	2		494.8054	987.5962	2	18,886.10	-0.0004439	405	-0.4491	414	4,928.93
(K)STLIIGGISK(S)	100%	30.51	25	30.51	2		494.8061	987.5976	2	27,762.10	0.0009601	405	0.9711	414	4,330.59
(K)STLIIGGISK(S)	100%	45.08	25	45.08	2		494.8053	987.596	2	40,531.60	-0.0006879	405	-0.6959	414	3,646.47
(K)STLIIGGISK(S)	100%	29.29	25	29.29	2		494.8053	987.596	2	56,339.00	-0.0006259	405	-0.6332	414	7,280.81
(K)STLIIGGISK(S)	100%	23.86	25	23.86	2		494.8059	987.5972	2	15,343.60	0.0005341	405	0.5402	414	5,720.01
(K)STLIIGGISK(S)	100%	23.39	25	23.39	2		494.8055	987.5965	2	11,950.50	-0.0001379	405	-0.1395	414	6,212.29
(K)STLIIGGISK(S)	100%	42.47	25	42.47	2		494.8052	987.5958	2	36,759.90	-0.0008699	405	-0.88	414	4,682.88
(K)STLIIGGISK(S)	100%	43.32	25	43.32	2		494.8052	987.5958	2	32,636.10	-0.0008699	405	-0.88	414	3,795.32
(K)STLIIGGISK(S)	100%	51.5	25	51.5	2		494.8053	987.5961	2	671305	-0.0005659	405	-0.5725	414	2,879.06
(K)STLIIGGISK(S)	100%	46.87	25	46.87	2		494.8052	987.5959	2	35,888.70	-0.0007479	405	-0.7566	414	3,729.50
(K)STLIIGGISK(S)	100%	47.02	25	47.02	2		494.8053	987.596	2	35,782.10	-0.0006879	405	-0.6959	414	3,679.89
(K)STLIIGGISK(S)	100%	50.77	25	50.77	2		494.8061	987.5976	2	25,747.50	0.0009001	405	0.9104	414	4,191.31
(K)STLIIGGISK(S)	100%	28.02	25	28.02	2		494.8053	987.5961	2	14,712.70	-0.0005659	405	-0.5725	414	5,631.61
(K)STLIIGGISK(S)	100%	44.65	25	44.65	2		494.8052	987.5958	2	16,075.40	-0.0008699	405	-0.88	414	5,136.64
(K)STLIIGGISK(S)	100%	32.22	25	32.22	2		494.8062	987.5979	2	15,378.70	0.001204	405	1.218	414	4,910.92
(K)STLIIGGISK(S)	100%	22.49	25	22.49	2		494.8059	987.5973	2	14,658.30	0.0005941	405	0.6009	414	6,247.01
(K)STLIIGGISK(S)	100%	47.87	25	47.87	2		494.8053	987.596	2	26,283.50	-0.0006879	405	-0.6959	414	4,122.34
(K)STLIIGGISK(S)	100%	31.88	25	31.88	2		494.8053	987.596	2	15,697.20	-0.0006879	405	-0.6959	414	4,769.29
(K)STLIIGGISK(S)	100%	48.45	25	48.45	2		494.8052	987.5959	2	32,981.00	-0.0008099	405	-0.8193	414	3,696.83
(K)STLIIGGISK(S)	100%	31.37	25	31.37	2		494.8053	987.596	2	13,907.30	-0.0006879	405	-0.6959	414	5,449.86
(K)STLIIGGISK(S)	100%	22.85	25	22.85	2		494.8058	987.5971	2	13,931.80	0.0004721	405	0.4775	414	7,296.11
(K)STLIIGGISK(S)	100%	49.15	25	49.15	2		494.8053	987.596	2	251100	-0.0006879	405	-0.6959	414	2,982.17
(K)STLIIGGISK(S)	100%	32.14	25	32.14	2		494.8063	987.5981	2	23,303.30	0.001388	405	1.404	414	4,410.23
(K)STLIIGGISK(S)	100%	53.21	25	53.21	2		494.806	987.5975	2	74,796.90	0.0008381	405	0.8477	414	3,241.15
(K)STLIIGGISK(S)	100%	53.69	25	53.69	2		494.8053	987.5961	2	102274	-0.0005659	405	-0.5725	414	3,137.33
(K)STLIIGGISK(S)	100%	53.75	25	53.75	2		494.8053	987.596	2	64,168.10	-0.0006259	405	-0.6332	414	3,326.20
(K)STLIIGGISK(S)	100%	26.09	25	26.09	2		494.8053	987.5961	2	14,662.80	-0.0005659	405	-0.5725	414	6,297.93
(K)STLIIGGISK(S)	100%	26.16	25	26.16	2		494.806	987.5974	2	15,131.50	0.0007781	405	0.787	414	6,115.63
(K)STLIIGGISK(S)	100%	31.47	25	31.47	2		494.8051	987.5957	2	54,499.00	-0.0009319	405	-0.9427	414	3,447.18
(K)STLIIGGISK(S)	100%	31.32	25	31.32	2		494.8052	987.5958	2	14,665.80	-0.0008699	405	-0.88	414	4,819.22
(K)STLIIGGISK(S)	100%	35.86	25	35.86	2		494.8064	987.5983	2	11,212.30	0.001632	405	1.651	414	5,909.48
(K)STLIIGGISK(S)	100%	30.39	25	30.39	2		494.8063	987.5981	2	12,746.60	0.001388	405	1.404	414	5,961.54
(K)STLIIGGISK(S)	100%	49.03	25	49.03	2		494.8051	987.5957	2	31,618.80	-0.0009919	405	-1.003	414	3,713.46
(K)STLIIGGISK(S)	100%	50.91	25	50.91	2		494.8052	987.5959	2	2157070	-0.0007479	405	-0.7566	414	2,816.00
(K)STLIIGGISK(S)	100%	53.09	25	53.09	2		494.8062	987.5978	2	32,552.80	0.001082	405	1.095	414	3,762.54
(K)STLIIGGISK(S)	100%	30.42	25	30.42	2		494.8052	987.5958	2	12,363.50	-0.0008699	405	-0.88	414	5,345.42
(K)STLIIGGISK(S)	100%	24.32	25	24.32	2		494.806	987.5975	2	12,868.90	0.0008381	405	0.8477	414	5,926.78
(K)STLIIGGISK(S)	100%	52.48	25	52.48	2		494.8052	987.5959	2	8.74E+07	-0.0008099	405	-0.8193	414	2,740.09
(K)STLIIGGISK(S)	100%	23.83	25	23.83	2		494.806	987.5974	2	15,728.50	0.0007781	405	0.787	414	5,737.49
(K)STLIIGGISK(S)	100%	51.12	25	51.12	2		494.8051	987.5957	2	1.32E+07	-0.0009919	405	-1.003	414	2,785.55
(K)STLIIGGISK(S)	100%	51.15	25	51.15	2		494.8051	987.5957	2	4772300	-0.0009919	405	-1.003	414	2,800.80
(K)STLIIGGISK(S)	100%	32.04	25	32.04	2		494.8064	987.5982	2	14,771.40	0.00151	405	1.527	414	6,351.76
(K)STLIIGGISK(S)	100%	47.83	25	47.83	2		494.8064	987.5982	2	13,362.40	0.00151	405	1.527	414	6,196.62
(K)STLIIGGISK(S)	100%	51.48	25	51.48	2		494.8052	987.5958	2	1121070	-0.0008699	405	-0.88	414	2,846.71
(K)STLIIGGISK(S)	100%	23.76	25	23.76	2		494.8061	987.5976	2	12,103.70	0.0009001	405	0.9104	414	5,943.91
(K)STLIIGGISK(S)	100%	42.68	25	42.68	2		494.805	987.5955	2	47,378.00	-0.001176	405	-1.189	414	3,582.31
(K)STLIIGGISK(S)	100%	43.64	25	43.64	2		494.805	987.5955	2	21,500.70	-0.001176	405	-1.189	414	4,665.26
(K)STLIIGGISK(S)	100%	44.26	25	44.26	2		494.805	987.5954	2	16,228.60	-0.001298	405	-1.313	414	5,242.22
(K)STLIIGGISK(S)	100%	52.64	25	52.64	2		494.8052	987.5958	2	56,780.30	-0.0008699	405	-0.88	414	3,343.35
(K)STLIIGGISK(S)	100%	22.8	25	22.8	2		494.8061	987.5976	2	7,558.79	0.0009601	405	0.9711	414	7,311.93
(K)STLIIGGISK(S)	100%	53.34	25	53.34	2		494.8051	987.5957	2	80,918.20	-0.0009319	405	-0.9427	414	3,258.16
(K)STLIIGGISK(S)	100%	46.53	25	46.53	2		494.805	987.5954	2	43,257.00	-0.001236	405	-1.25	414	3,612.96
(K)STLIIGGISK(S)	100%	50.96	25	50.96	2		494.8064	987.5982	2	118499	0.00157	405	1.588	414	3,068.56
(K)STLIIGGISK(S)	100%	33.1	25	33.1	2		494.8065	987.5985	2	12,545.80	0.001816	405	1.837	414	5,499.66
(K)STLIIGGISK(S)	100%	48.45	25	48.45	2		494.805	987.5954	2	22,287.80	-0.001298	405	-1.313	414	4,392.71
(K)STLIIGGISK(S)	100%	22.71	25	22.71	2		494.8052	987.5959	2	45,958.70	-0.0007479	405	-0.7566	414	2,077.41
(K)STLIIGGISK(S)	100%	22.47	25	22.47	2		494.8062	987.5979	2	14,976.60	0.001266	405	1.281	414	6,334.55
(K)STLIIGGISK(S)	100%	45.81	25	45.81	2		494.8048	987.5951	2	18,312.00	-0.001602	405	-1.62	414	4,950.30
(K)STLIIGGISK(S)	100%	55.16	25	55.16	2		494.8051	987.5956	2	4.14E+07	-0.001054	405	-1.066	414	2,770.39
(K)STLIIGGISK(S)	100%	30.73	25	30.73	2		494.8049	987.5953	2	12,239.40	-0.001358	405	-1.374	414	5,328.42
(K)STLIIGGISK(S)	100%	32.67	25	32.67	2		494.8068	987.599	2	17,794.50	0.002304	405	2.331	414	4,718.07
(K)STLIIGGISK(S)	100%	51.66	25	51.66	2		494.8049	987.5953	2	6.90E+07	-0.00142	405	-1.436	414	2,755.21
(K)STLIIGGISK(S)	100%	43.22	25	43.22	2		494.8046	987.5946	2	20,788.60	-0.00203	405	-2.053	414	4,638.80
(K)STLIIGGISK(S)	100%	43.48	25	43.48	2		494.8047	987.5948	2	16,735.60	-0.001846	405	-1.867	414	5,204.83
(K)STLIIGGISK(S)	100%	46.93	25	46.93	2		494.8047	987.5949	2	32,460.00	-0.001724	405	-1.744	414	3,779.01
(K)STLIIGGISK(S)	100%	24.97	25	24.97	2		494.8048	987.5951	2	14,288.60	-0.001602	405	-1.62	414	6,015.74
(K)STLIIGGISK(S)	100%	34.2	25	34.2	2		494.807	987.5995	2	23,232.70	0.002792	405	2.824	414	4,540.80
(K)STLIIGGISK(S)	100%	55.64	25	55.64	2		494.8068	987.599	2	25,290.80	0.002304	405	2.331	414	4,209.16
(K)STLIIGGISK(S)	100%	51.41	25	51.41	2		494.8071	987.5996	2	35,844.70	0.002914	405	2.948	414	3,745.26
(K)STLIIGGISK(S)	100%	21.8	25	21.8	2		494.8056	987.5966	2	13,716.30	-0.00007594	405	-0.07682	414	5,754.35
(K)STLIIGGISK(S)	100%	31.81	25	31.81	2		494.8036	987.5926	2	34,447.00	-0.004044	405	-4.091	414	4,061.75
(K)STLIIGGISK(S)	100%	21.17	25	21.17	2		494.8064	987.5982	2	15,983.40	0.00151	405	1.527	414	6,386.61
(K)STLIIGGISK(S)	100%	20.38	25	20.38	2		494.8058	987.597	2	13,417.40	0.0002901	405	0.2934	414	5,771.57
(K)STLIIGGISK(S)	100%	19.3	25	19.3	2		494.8054	987.5962	2	13,858.00	-0.0005039	405	-0.5098	414	6,031.66
(K)STLIIGGISK(S)	100%	20.3	25	20.3	2		494.8052	987.5958	2	50,971.60	-0.0008699	405	-0.88	414	3,551.30
(K)STLIIGGISK(S)	100%	18.28	25	18.28	2		494.806	987.5975	2	5,284.78	0.0008381	405	0.8477	414	7,327.84
(K)STLIIGGISK(S)	99%	17.11	25	17.11	2		494.8056	987.5967	2	68,032.00	-0.00001594	405	-0.01613	414	3,535.53
(K)STLIIGGISK(S)	99%	17.28	25	17.28	2		494.8058	987.597	2	13,590.20	0.0003501	405	0.3541	414	6,281.01
(K)STLIIGGISK(S)	99%	17.34	25	17.34	2		494.8058	987.597	2	21,474.70	0.0002901	405	0.2934	414	5,789.16
(K)STLIIGGISK(S)	99%	17.06	25	17.06	2		494.8057	987.5969	2	14,889.30	0.0002281	405	0.2307	414	5,806.23
(K)STLIIGGISK(S)	99%	16.51	25	16.51	2		494.8059	987.5973	2	19,915.80	0.0006561	405	0.6636	414	6,886.06
(K)STLIIGGISK(S)	99%	16.8	25	16.8	2		494.8054	987.5963	2	19,160.40	-0.0003819	405	-0.3863	414	5,535.62
(K)STLIIGGISK(S)	99%	16.67	25	16.67	2		494.806	987.5974	2	91,319.40	0.0007161	405	0.7243	414	7,264.02
(K)STLIIGGISK(S)	99%	16.13	25	16.13	2		494.8061	987.5977	2	14,273.60	0.001022	405	1.034	414	6,132.33
(K)STLIIGGISK(S)	99%	16.33	25	16.33	2		494.8052	987.5959	2	17,387.40	-0.0008099	405	-0.8193	414	5,684.00
(K)STLIIGGISK(S)	99%	15.21	25	15.21	2		494.8059	987.5973	2	20,458.20	0.0006561	405	0.6636	414	6,456.65
(K)STLIIGGISK(S)	99%	16.49	25	16.49	2		494.8064	987.5982	2	15,333.00	0.00151	405	1.527	414	5,615.96
(K)STLIIGGISK(S)	99%	16.29	25	16.29	2		494.8064	987.5982	2	14,592.30	0.00157	405	1.588	414	6,316.73
(K)STLIIGGISK(S)	98%	14.56	25	14.56	2		494.8054	987.5962	2	29,306.20	-0.0004439	405	-0.4491	414	6,706.25
(K)STLIIGGISK(S)	97%	13.54	25	13.54	2		494.8057	987.5969	2	11,630.00	0.0002281	405	0.2307	414	6,263.50
(K)STLIIGGISK(S)	97%	14.51	25	14.51	2		494.8063	987.5981	2	11,796.50	0.001388	405	1.404	414	6,147.95
(K)STLIIGGISK(S)	97%	13.14	25	13.14	2		494.8058	987.597	2	20,566.70	0.0003501	405	0.3541	414	6,422.97
(K)STLIIGGISK(S)	96%	13.19	25	13.19	2		494.8058	987.5971	2	23,759.10	0.0004721	405	0.4775	414	6,522.42
(K)STLIIGGISK(S)	95%	13.8	25	13.8	2		494.805	987.5954	2	129629	-0.001236	405	-1.25	414	3,520.38
(K)STLIIGGISK(S)	94%	11.71	25	11.71	2		494.8057	987.5969	2	15,789.20	0.0002281	405	0.2307	414	5,483.85
(K)STLIIGGISK(S)	94%	12.07	25	12.07	2		494.8055	987.5964	2	23,133.90	-0.0002599	405	-0.2629	414	4,312.66
(K)STLIIGGISK(S)	93%	11.72	25	11.72	2		494.8058	987.5971	2	25,407.60	0.0004121	405	0.4168	414	6,774.91
(K)STLIIGGISK(S)	91%	11.85	25	11.85	2		494.8062	987.5979	2	29,632.20	0.001204	405	1.218	414	6,757.68
(K)STLIIGGISKSFYEGDIYmLPVLK(E)	100%	40.31	25	40.31	2	Oxidation (+16)	887.4797	2,659.42	3	21,483.70	-0.001488	405	-0.5593	428	5,803.65
(K)STLIIGGISKSFYEGDIYMLPVLK(E)	100%	43.36	25	43.36	2		882.1488	2,643.42	3	20,308.50	0.0008141	405	0.3078	428	5,984.77
(K)STLIIGGISKSFYEGDIYMLPVLK(E)	100%	44.94	25	44.94	2		882.1492	2,643.43	3	29,684.30	0.002095	405	0.7923	428	6,125.31
(K)STLIIGGISKSFYEGDIYmLPVLK(E)	100%	44.81	25	44.81	2	Oxidation (+16)	887.4796	2,659.42	3	17,799.20	-0.001854	405	-0.6969	428	5,633.30
(K)STLIIGGISKSFYEGDIYmLPVLK(E)	100%	25.29	25	25.29	2	Oxidation (+16)	887.4805	2,659.42	3	9,229.96	0.001077	405	0.4048	428	5,823.26
(K)STLIIGGISKSFYEGDIYmLPVLK(E)	100%	65.79	25	65.79	2	Oxidation (+16)	887.4798	2,659.42	3	95,095.40	-0.001122	405	-0.4217	428	5,787.42
(K)STLIIGGISKSFYEGDIYmLPVLK(E)	100%	65.53	25	65.53	2	Oxidation (+16)	887.4808	2,659.42	3	38,693.50	0.001992	405	0.7488	428	5,769.09
(K)STLIIGGISKSFYEGDIYmLPVLK(E)	100%	60.16	25	60.16	2	Oxidation (+16)	887.4811	2,659.42	3	37,682.10	0.002907	405	1.093	428	5,649.59
(K)STLIIGGISKSFYEGDIYMLPVLK(E)	100%	62.8	25	62.8	2		882.1493	2,643.43	3	22,590.90	0.002278	405	0.8615	428	6,141.67
(K)STLIIGGISKSFYEGDIYMLPVLK(E)	100%	21.36	25	21.36	2		882.1479	2,643.42	3	6,195.97	-0.001934	405	-0.7313	428	6,158.65
(K)STLIIGGISKSFYEGDIYmLPVLK(E)	100%	56.77	25	56.77	2	Oxidation (+16)	887.4734	2,659.40	3	22,091.40	-0.02035	405	-7.648	428	6,403.33
(S)TLIIGGISK(S)	100%	33.84	25	33.84	1		451.2894	900.5642	2	163273	-0.0004259	406	-0.4724	414	2,749.42
(S)TLIIGGISK(S)	100%	29.63	25	29.63	1		451.2895	900.5645	2	24,882.20	-0.0001819	406	-0.2018	414	2,712.54
(S)TLIIGGISK(S)	100%	37.79	25	37.79	1		451.288	900.5615	2	50,677.40	-0.003172	406	-3.518	414	2,781.65
(S)TLIIGGISK(S)	100%	20.92	25	20.92	1		451.2904	900.5662	2	31,274.20	0.001528	406	1.695	414	2,807.79
(S)TLIIGGISK(S)	99%	16.79	25	16.79	1		451.2892	900.5639	2	20,205.30	-0.0007299	406	-0.8096	414	2,695.09
(T)LIIGGISK(S)	99%	39.8	25	39.8	1		400.7653	799.516	2	1607640	-0.001004	407	-1.254	414	2,747.70
(T)LIIGGISK(S)	99%	39.34	25	36.63	1		400.7654	799.5163	2	70,828.90	-0.0006999	407	-0.8744	414	2,815.24
(T)LIIGGISK(S)	99%	42.55	25	39.84	1		400.7652	799.5159	2	38,668.90	-0.001066	407	-1.332	414	2,856.21
(T)LIIGGISK(S)	99%	42.85	25	40.16	1		400.7654	799.5163	2	48,173.90	-0.0006999	407	-0.8744	414	2,830.77
(T)LIIGGISK(S)	99%	42.05	25	42.05	1		400.7664	799.5182	2	34,381.00	0.001192	407	1.489	414	2,877.57
(T)LIIGGISK(S)	99%	42.1	25	42.1	1		400.7654	799.5161	2	1091790	-0.0008219	407	-1.027	414	2,732.45
(T)LIIGGISK(S)	99%	43.68	25	40.42	1		400.7655	799.5164	2	381966	-0.0005779	407	-0.722	414	2,779.01
(T)LIIGGISK(S)	99%	44.17	25	40.91	1		400.7654	799.5163	2	1012070	-0.0006379	407	-0.7969	414	2,763.93
(T)LIIGGISK(S)	99%	48.65	25	45.53	1		400.7655	799.5165	2	133184	-0.0005159	407	-0.6445	414	2,795.16
(T)LIIGGISK(S)	99%	21.38	25	17	1		400.7662	799.5179	2	40,991.30	0.0009481	407	1.184	414	2,897.01
(T)LIIGGISK(S)	99%	17.14	25	17.14	1		400.7655	799.5165	2	59,696.30	-0.0004559	407	-0.5696	414	2,417.94
(K)SFYEGDIYmLPVLK(E)	100%	40.1	25	40.1	2	Oxidation (+16)	845.9244	1,689.83	2	5,821.69	0.001617	415	0.9564	428	7,391.27
(K)SFYEGDIYmLPVLK(E)	100%	38.99	25	38.99	2	Oxidation (+16)	845.9169	1,689.82	2	13,432.10	-0.01327	415	-7.851	428	7,023.07
(K)SFYEGDIYmLPVLK(E)	100%	42.3	25	42.3	2	Oxidation (+16)	845.9236	1,689.83	2	16,863.20	0.000153	415	0.09052	428	7,315.20
(K)SFYEGDIYmLPVLK(E)	100%	27.58	25	27.58	2	Oxidation (+16)	845.9236	1,689.83	2	2,022.53	0.000153	415	0.09052	428	7,494.12
(K)SFYEGDIYmLPVLK(E)	100%	52.39	25	52.39	2	Oxidation (+16)	845.9236	1,689.83	2	140655	0.000153	415	0.09052	428	5,624.16
(K)SFYEGDIYmLPVLK(E)	100%	42.48	25	42.48	2	Oxidation (+16)	845.9238	1,689.83	2	41,540.80	0.000397	415	0.2348	428	6,603.08
(K)SFYEGDIYmLPVLK(E)	100%	43.15	25	43.15	2	Oxidation (+16)	845.9241	1,689.83	2	81,953.60	0.001129	415	0.6677	428	5,759.71
(K)SFYEGDIYmLPVLK(E)	100%	48.08	25	48.08	2	Oxidation (+16)	845.9241	1,689.83	2	140844	0.001007	415	0.5956	428	5,660.31
(K)SFYEGDIYmLPVLK(E)	100%	52.52	25	52.52	2	Oxidation (+16)	845.9235	1,689.83	2	24,356.80	-0.00009095	415	-0.05379	428	6,834.36
(K)SFYEGDIYmLPVLK(E)	100%	49.34	25	49.34	2	Oxidation (+16)	845.9238	1,689.83	2	275545	0.000397	415	0.2348	428	5,034.46
(K)SFYEGDIYmLPVLK(E)	100%	49.44	25	49.44	2	Oxidation (+16)	845.9238	1,689.83	2	56,212.80	0.000397	415	0.2348	428	6,374.90
(K)SFYEGDIYMLPVLK(E)	100%	48.57	25	48.57	2		837.9258	1,673.84	2	14,500.10	-0.0006599	415	-0.394	428	7,025.41
(K)SFYEGDIYMLPVLK(E)	100%	50.59	25	50.59	2		837.9264	1,673.84	2	38,104.40	0.0005621	415	0.3356	428	6,605.46
(K)SFYEGDIYMLPVLK(E)	100%	54.39	25	54.39	2		837.9261	1,673.84	2	48,072.50	-0.00004994	415	-0.02982	428	6,510.81
(K)SFYEGDIYmLPVLK(E)	100%	36.43	25	36.43	2	Oxidation (+16)	845.9243	1,689.83	2	3,269.99	0.001495	415	0.8842	428	7,437.65
(K)SFYEGDIYmLPVLK(E)	100%	54.13	25	54.13	2	Oxidation (+16)	845.9236	1,689.83	2	797497	0.00003105	415	0.01836	428	6,711.37
(K)SFYEGDIYmLPVLK(E)	100%	48.65	25	48.65	2	Oxidation (+16)	845.9242	1,689.83	2	37,968.00	0.001251	415	0.7399	428	6,507.70
(K)SFYEGDIYmLPVLK(E)	100%	55.3	25	55.3	2	Oxidation (+16)	845.9236	1,689.83	2	58,032.70	0.00003105	415	0.01836	428	6,356.31
(K)SFYEGDIYmLPVLK(E)	100%	52.78	25	52.78	2	Oxidation (+16)	845.9241	1,689.83	2	40,830.80	0.001129	415	0.6677	428	6,539.49
(K)SFYEGDIYmLPVLK(E)	100%	56.86	25	56.86	2	Oxidation (+16)	845.9235	1,689.83	2	47,730.00	-0.00009095	415	-0.05379	428	6,475.69
(K)SFYEGDIYmLPVLK(E)	100%	51.5	25	51.5	2	Oxidation (+16)	845.9239	1,689.83	2	55,570.70	0.000641	415	0.3791	428	7,284.35
(K)SFYEGDIYmLPVLK(E)	100%	53.2	25	53.2	2	Oxidation (+16)	845.9238	1,689.83	2	16,903.90	0.000519	415	0.307	428	7,330.74
(K)SFYEGDIYmLPVLK(E)	100%	56.07	25	56.07	2	Oxidation (+16)	845.9236	1,689.83	2	48,835.90	0.00003105	415	0.01836	428	6,425.28
(K)SFYEGDIYmLPVLK(E)	100%	53.24	25	53.24	2	Oxidation (+16)	845.9241	1,689.83	2	84,269.20	0.001129	415	0.6677	428	5,776.51
(K)SFYEGDIYmLPVLK(E)	100%	54.24	25	54.24	2	Oxidation (+16)	845.9235	1,689.83	2	1010510	-0.000213	415	-0.1259	428	5,315.13
(K)SFYEGDIYmLPVLK(E)	100%	60.88	25	60.88	2	Oxidation (+16)	845.9236	1,689.83	2	41,295.10	0.000153	415	0.09052	428	6,049.44
(K)SFYEGDIYmLPVLK(E)	100%	60.89	25	60.89	2	Oxidation (+16)	845.9236	1,689.83	2	30,608.00	0.000153	415	0.09052	428	6,633.55
(K)SFYEGDIYmLPVLK(E)	100%	52.99	25	52.99	2	Oxidation (+16)	845.9233	1,689.83	2	1611400	-0.000579	415	-0.3424	428	5,267.28
(K)SFYEGDIYMLPVLK(E)	100%	58.68	25	58.68	2		837.9263	1,673.84	2	34,115.50	0.0003181	415	0.1899	428	6,698.35
(K)SFYEGDIYmLPVLK(E)	100%	53.18	25	53.18	2	Oxidation (+16)	845.9239	1,689.83	2	71,532.00	0.000641	415	0.3791	428	5,814.36
(K)SFYEGDIYMLPVLK(E)	100%	54.4	25	54.4	2		837.9266	1,673.84	2	42,382.70	0.00105	415	0.627	428	6,573.83
(K)SFYEGDIYmLPVLK(E)	100%	62.37	25	62.37	2	Oxidation (+16)	845.9236	1,689.83	2	32,697.60	0.000153	415	0.09052	428	6,788.93
(K)SFYEGDIYmLPVLK(E)	100%	54.19	25	54.19	2	Oxidation (+16)	845.9233	1,689.83	2	787772	-0.000579	415	-0.3424	428	5,464.27
(K)SFYEGDIYmLPVLK(E)	100%	44.93	25	44.93	2	Oxidation (+16)	845.9246	1,689.83	2	39,324.00	0.001985	415	1.174	428	6,664.84
(K)SFYEGDIYmLPVLK(E)	100%	56.24	25	56.24	2	Oxidation (+16)	845.9234	1,689.83	2	1508400	-0.000335	415	-0.1981	428	5,172.31
(K)SFYEGDIYmLPVLK(E)	100%	59.84	25	59.84	2	Oxidation (+16)	845.9235	1,689.83	2	35,932.80	-0.00009095	415	-0.05379	428	6,065.23
(K)SFYEGDIYmLPVLK(E)	100%	59.89	25	59.89	2	Oxidation (+16)	845.9235	1,689.83	2	34,840.30	-0.00009095	415	-0.05379	428	6,819.28
(K)SFYEGDIYmLPVLK(E)	100%	60.71	25	60.71	2	Oxidation (+16)	845.9237	1,689.83	2	38,879.80	0.000275	415	0.1627	428	6,179.61
(K)SFYEGDIYmLPVLK(E)	100%	60.87	25	60.87	2	Oxidation (+16)	845.9237	1,689.83	2	45,772.00	0.000275	415	0.1627	428	5,966.05
(K)SFYEGDIYmLPVLK(E)	100%	56.46	25	56.46	2	Oxidation (+16)	845.9241	1,689.83	2	47,918.10	0.001129	415	0.6677	428	6,333.32
(K)SFYEGDIYmLPVLK(E)	100%	61.03	25	61.03	2	Oxidation (+16)	845.9237	1,689.83	2	42,660.30	0.000275	415	0.1627	428	5,999.30
(K)SFYEGDIYmLPVLK(E)	100%	51.07	25	51.07	2	Oxidation (+16)	845.9244	1,689.83	2	60,916.90	0.001617	415	0.9564	428	5,831.43
(K)SFYEGDIYMLPVLK(E)	100%	55.56	25	55.56	2		837.9265	1,673.84	2	43,813.00	0.0006841	415	0.4084	428	6,558.56
(K)SFYEGDIYMLPVLK(E)	100%	54.67	25	54.67	2		837.9268	1,673.84	2	91,003.00	0.001294	415	0.7726	428	5,979.10
(K)SFYEGDIYmLPVLK(E)	100%	68.28	25	68.28	2	Oxidation (+16)	845.9236	1,689.83	2	1.23E+07	0.000153	415	0.09052	428	5,095.23
(K)SFYEGDIYmLPVLK(E)	100%	68.33	25	68.33	2	Oxidation (+16)	845.9236	1,689.83	2	601911	0.000153	415	0.09052	428	5,480.89
(K)SFYEGDIYMLPVLK(E)	100%	47.05	25	47.05	2		837.9272	1,673.84	2	26,235.50	0.002148	415	1.283	428	6,790.71
(K)SFYEGDIYMLPVLK(E)	100%	55.88	25	55.88	2		837.9257	1,673.84	2	53,645.10	-0.0007819	415	-0.4669	428	6,445.79
(K)SFYEGDIYmLPVLK(E)	100%	56.79	25	56.79	2	Oxidation (+16)	845.9233	1,689.83	2	29,896.00	-0.000579	415	-0.3424	428	6,649.06
(K)SFYEGDIYmLPVLK(E)	100%	57.81	25	57.81	2	Oxidation (+16)	845.9238	1,689.83	2	16,475.10	0.000519	415	0.307	428	7,005.53
(K)SFYEGDIYmLPVLK(E)	100%	53.04	25	53.04	2	Oxidation (+16)	845.9243	1,689.83	2	69,990.50	0.001373	415	0.8121	428	6,246.67
(K)SFYEGDIYmLPVLK(E)	100%	49.81	25	49.81	2	Oxidation (+16)	845.9246	1,689.83	2	51,766.10	0.001985	415	1.174	428	6,033.67
(K)SFYEGDIYmLPVLK(E)	100%	63.72	25	63.72	2	Oxidation (+16)	845.9235	1,689.83	2	780380	-0.00009095	415	-0.05379	428	5,331.09
(K)SFYEGDIYmLPVLK(E)	100%	63.91	25	63.91	2	Oxidation (+16)	845.9235	1,689.83	2	30,313.30	-0.00009095	415	-0.05379	428	6,679.92
(K)SFYEGDIYmLPVLK(E)	100%	63.99	25	63.99	2	Oxidation (+16)	845.9235	1,689.83	2	21,520.30	-0.00009095	415	-0.05379	428	6,804.00
(K)SFYEGDIYmLPVLK(E)	100%	64.03	25	64.03	2	Oxidation (+16)	845.9235	1,689.83	2	28,945.00	-0.00009095	415	-0.05379	428	6,757.00
(K)SFYEGDIYmLPVLK(E)	100%	50.6	25	50.6	2	Oxidation (+16)	845.923	1,689.83	2	48,377.40	-0.001189	415	-0.7032	428	6,444.73
(K)SFYEGDIYMLPVLK(E)	100%	28.8	25	28.8	2		837.9271	1,673.84	2	5,987.80	0.001904	415	1.137	428	7,377.35
(K)SFYEGDIYmLPVLK(E)	100%	60.33	25	60.33	2	Oxidation (+16)	845.9234	1,689.83	2	584759	-0.000335	415	-0.1981	428	5,448.51
(K)SFYEGDIYmLPVLK(E)	100%	51.52	25	51.52	2	Oxidation (+16)	845.9246	1,689.83	2	42,880.70	0.001985	415	1.174	428	6,163.60
(K)SFYEGDIYmLPVLK(E)	100%	60.77	25	60.77	2	Oxidation (+16)	845.9234	1,689.83	2	41,979.20	-0.000335	415	-0.1981	428	6,114.18
(K)SFYEGDIYmLPVLK(E)	100%	60.87	25	60.87	2	Oxidation (+16)	845.9234	1,689.83	2	37,047.70	-0.000335	415	-0.1981	428	6,211.95
(K)SFYEGDIYmLPVLK(E)	100%	55.73	25	55.73	2	Oxidation (+16)	845.9243	1,689.83	2	63,802.60	0.001495	415	0.8842	428	6,280.67
(K)SFYEGDIYMLPVLK(E)	100%	58.44	25	58.44	2		837.9267	1,673.84	2	247104	0.001172	415	0.6998	428	5,775.29
(K)SFYEGDIYmLPVLK(E)	100%	57.05	25	57.05	2	Oxidation (+16)	845.9231	1,689.83	2	1360670	-0.000945	415	-0.5589	428	5,220.28
(K)SFYEGDIYmLPVLK(E)	100%	60.45	25	60.45	2	Oxidation (+16)	845.9233	1,689.83	2	1225370	-0.000579	415	-0.3424	428	5,204.94
(K)SFYEGDIYmLPVLK(E)	100%	72.45	25	72.45	2	Oxidation (+16)	845.9236	1,689.83	2	28,148.40	0.000153	415	0.09052	428	6,741.74
(K)SFYEGDIYmLPVLK(E)	100%	60.29	25	60.29	2	Oxidation (+16)	845.9232	1,689.83	2	371297	-0.000701	415	-0.4146	428	5,415.42
(K)SFYEGDIYmLPVLK(E)	100%	64.13	25	64.13	2	Oxidation (+16)	845.9235	1,689.83	2	107484	-0.000213	415	-0.1259	428	5,738.94
(K)SFYEGDIYmLPVLK(E)	100%	64.25	25	64.25	2	Oxidation (+16)	845.9235	1,689.83	2	542749	-0.000213	415	-0.1259	428	5,514.10
(K)SFYEGDIYmLPVLK(E)	100%	60.93	25	60.93	2	Oxidation (+16)	845.9239	1,689.83	2	47,153.20	0.000641	415	0.3791	428	6,263.28
(K)SFYEGDIYmLPVLK(E)	100%	64.25	25	64.25	2	Oxidation (+16)	845.924	1,689.83	2	81,149.20	0.000885	415	0.5234	428	5,719.68
(K)SFYEGDIYmLPVLK(E)	100%	59.97	25	59.97	2	Oxidation (+16)	845.9233	1,689.83	2	389307	-0.000457	415	-0.2703	428	5,397.03
(K)SFYEGDIYmLPVLK(E)	100%	60.71	25	60.71	2	Oxidation (+16)	845.9232	1,689.83	2	84,815.30	-0.000823	415	-0.4867	428	5,694.30
(K)SFYEGDIYmLPVLK(E)	100%	64.51	25	64.51	2	Oxidation (+16)	845.924	1,689.83	2	1667920	0.000885	415	0.5234	428	5,156.55
(K)SFYEGDIYmLPVLK(E)	100%	53.43	25	53.43	2	Oxidation (+16)	845.9247	1,689.83	2	54,618.30	0.002229	415	1.318	428	5,948.37
(K)SFYEGDIYmLPVLK(E)	100%	50.22	25	50.22	2	Oxidation (+16)	845.9249	1,689.84	2	54,876.20	0.002717	415	1.607	428	6,017.15
(K)SFYEGDIYMLPVLK(E)	100%	63.86	25	63.86	2		837.9265	1,673.84	2	62,929.20	0.0008061	415	0.4813	428	6,256.62
(K)SFYEGDIYmLPVLK(E)	100%	63.68	25	63.68	2	Oxidation (+16)	845.9233	1,689.83	2	17,879.20	-0.000579	415	-0.3424	428	6,926.87
(K)SFYEGDIYMLPVLK(E)	100%	55.81	25	55.81	2		837.9271	1,673.84	2	49,181.10	0.002026	415	1.21	428	6,206.99
(K)SFYEGDIYmLPVLK(E)	100%	64.3	25	64.3	2	Oxidation (+16)	845.9233	1,689.83	2	593521	-0.000579	415	-0.3424	428	5,498.03
(K)SFYEGDIYmLPVLK(E)	100%	63.95	25	63.95	2	Oxidation (+16)	845.9239	1,689.83	2	19,095.40	0.000641	415	0.3791	428	6,896.48
(K)SFYEGDIYmLPVLK(E)	100%	71.34	25	71.34	2	Oxidation (+16)	845.9236	1,689.83	2	2291440	0.00003105	415	0.01836	428	5,141.17
(K)SFYEGDIYmLPVLK(E)	100%	72.46	25	72.46	2	Oxidation (+16)	845.9237	1,689.83	2	32,559.60	0.000275	415	0.1627	428	6,571.72
(K)SFYEGDIYMLPVLK(E)	100%	63.83	25	63.83	2		837.9257	1,673.84	2	48,601.50	-0.0007819	415	-0.4669	428	6,495.06
(K)SFYEGDIYmLPVLK(E)	100%	64.16	25	64.16	2	Oxidation (+16)	845.9232	1,689.83	2	752292	-0.000823	415	-0.4867	428	5,346.87
(K)SFYEGDIYmLPVLK(E)	100%	62.25	25	62.25	2	Oxidation (+16)	845.9233	1,689.83	2	40,636.40	-0.000457	415	-0.2703	428	6,081.07
(K)SFYEGDIYmLPVLK(E)	100%	48.59	25	48.59	2	Oxidation (+16)	845.9225	1,689.83	2	22,357.90	-0.002167	415	-1.282	428	4,897.34
(K)SFYEGDIYmLPVLK(E)	100%	57.01	25	57.01	2	Oxidation (+16)	845.923	1,689.83	2	63,228.90	-0.001189	415	-0.7032	428	5,797.37
(K)SFYEGDIYMLPVLK(E)	100%	64.17	25	64.17	2		837.9259	1,673.84	2	836665	-0.0004159	415	-0.2483	428	5,655.70
(K)SFYEGDIYMLPVLK(E)	100%	67.16	25	67.16	2		837.9265	1,673.84	2	38,312.30	0.0006841	415	0.4084	428	6,667.47
(K)SFYEGDIYmLPVLK(E)	100%	61.08	25	61.08	2	Oxidation (+16)	845.9231	1,689.83	2	114011	-0.000945	415	-0.5589	428	5,641.40
(K)SFYEGDIYmLPVLK(E)	100%	56.22	25	56.22	2	Oxidation (+16)	845.9229	1,689.83	2	47,518.70	-0.001433	415	-0.8475	428	6,492.61
(K)SFYEGDIYMLPVLK(E)	100%	67.24	25	67.24	2		837.9257	1,673.84	2	1194500	-0.0007819	415	-0.4669	428	5,638.59
(K)SFYEGDIYmLPVLK(E)	100%	70.44	25	70.44	2	Oxidation (+16)	845.924	1,689.83	2	25,888.90	0.000763	415	0.4513	428	7,299.92
(K)SFYEGDIYMLPVLK(E)	100%	61.01	25	61.01	2		837.9268	1,673.84	2	53,221.70	0.001416	415	0.8455	428	6,241.21
(K)SFYEGDIYmLPVLK(E)	100%	60.68	25	60.68	2	Oxidation (+16)	845.9244	1,689.83	2	37,167.50	0.001617	415	0.9564	428	6,147.61
(K)SFYEGDIYmLPVLK(E)	100%	60.76	25	60.76	2	Oxidation (+16)	845.9244	1,689.83	2	28,699.20	0.001617	415	0.9564	428	6,695.75
(K)SFYEGDIYMLPVLK(E)	100%	67.52	25	67.52	2		837.9267	1,673.84	2	64,816.30	0.001172	415	0.6998	428	6,376.92
(K)SFYEGDIYmLPVLK(E)	100%	63.36	25	63.36	2	Oxidation (+16)	845.923	1,689.83	2	15,685.80	-0.001067	415	-0.631	428	6,942.28
(K)SFYEGDIYmLPVLK(E)	100%	61.45	25	61.45	2	Oxidation (+16)	845.9244	1,689.83	2	45,032.70	0.001739	415	1.029	428	5,982.86
(K)SFYEGDIYmLPVLK(E)	100%	71.93	25	71.93	2	Oxidation (+16)	845.9241	1,689.83	2	291515	0.001129	415	0.6677	428	5,576.70
(K)SFYEGDIYmLPVLK(E)	100%	64.21	25	64.21	2	Oxidation (+16)	845.9244	1,689.83	2	28,293.00	0.001617	415	0.9564	428	6,726.62
(K)SFYEGDIYmLPVLK(E)	100%	60.34	25	60.34	2	Oxidation (+16)	845.923	1,689.83	2	104773	-0.001189	415	-0.7032	428	5,677.15
(K)SFYEGDIYmLPVLK(E)	100%	60.59	25	60.59	2	Oxidation (+16)	845.9229	1,689.83	2	29,208.60	-0.001311	415	-0.7753	428	6,554.67
(K)SFYEGDIYmLPVLK(E)	100%	23.43	25	23.43	2	Oxidation (+16)	845.9249	1,689.84	2	7,864.71	0.002717	415	1.607	428	7,376.07
(K)SFYEGDIYmLPVLK(E)	100%	71.5	25	71.5	2	Oxidation (+16)	845.9232	1,689.83	2	50,695.80	-0.000701	415	-0.4146	428	6,228.53
(K)SFYEGDIYmLPVLK(E)	100%	72.44	25	72.44	2	Oxidation (+16)	845.9241	1,689.83	2	58,725.50	0.001129	415	0.6677	428	6,300.51
(K)SFYEGDIYMLPVLK(E)	100%	53.24	25	53.24	2		837.9276	1,673.84	2	32,495.60	0.00288	415	1.72	428	6,775.24
(K)SFYEGDIYmLPVLK(E)	100%	56.82	25	56.82	2	Oxidation (+16)	845.9248	1,689.84	2	35,125.20	0.002473	415	1.463	428	6,523.10
(K)SFYEGDIYmLPVLK(E)	100%	26.41	25	26.41	2	Oxidation (+16)	845.9252	1,689.84	2	3,509.85	0.003327	415	1.968	428	7,454.05
(K)SFYEGDIYmLPVLK(E)	100%	56.92	25	56.92	2	Oxidation (+16)	845.925	1,689.84	2	53,938.90	0.002839	415	1.679	428	6,391.18
(K)SFYEGDIYmLPVLK(E)	100%	72.64	25	72.64	2	Oxidation (+16)	845.9239	1,689.83	2	45,985.50	0.000641	415	0.3791	428	5,931.86
(K)SFYEGDIYMLPVLK(E)	100%	61.45	25	61.45	2		837.9272	1,673.84	2	45,835.20	0.00227	415	1.355	428	6,621.40
(K)SFYEGDIYmLPVLK(E)	100%	63.87	25	63.87	2	Oxidation (+16)	845.9229	1,689.83	2	1593510	-0.001311	415	-0.7753	428	5,235.60
(K)SFYEGDIYmLPVLK(E)	100%	43.18	25	43.18	2	Oxidation (+16)	845.9254	1,689.84	2	64,869.70	0.003571	415	2.112	428	5,913.39
(K)SFYEGDIYmLPVLK(E)	100%	76.26	25	76.26	2	Oxidation (+16)	845.9235	1,689.83	2	452900	-0.00009095	415	-0.05379	428	5,432.23
(K)SFYEGDIYMLPVLK(E)	100%	64.65	25	64.65	2		837.9255	1,673.84	2	20,186.60	-0.001148	415	-0.6854	428	6,836.30
(K)SFYEGDIYMLPVLK(E)	100%	76.94	25	76.94	2		837.9263	1,673.84	2	79,945.30	0.0003181	415	0.1899	428	6,290.83
(K)SFYEGDIYMLPVLK(E)	100%	77	25	77	2		837.9263	1,673.84	2	74,648.40	0.0003181	415	0.1899	428	5,995.55
(K)SFYEGDIYmLPVLK(E)	100%	35.34	25	35.34	2	Oxidation (+16)	845.9257	1,689.84	2	34,394.10	0.004181	415	2.473	428	4,877.71
(K)SFYEGDIYMLPVLK(E)	100%	77.01	25	77.01	2		837.9263	1,673.84	2	48,143.70	0.0003181	415	0.1899	428	6,175.07
(K)SFYEGDIYMLPVLK(E)	100%	77.04	25	77.04	2		837.9263	1,673.84	2	92,306.10	0.0003181	415	0.1899	428	5,859.30
(K)SFYEGDIYMLPVLK(E)	100%	76.73	25	76.73	2		837.9261	1,673.84	2	56,995.90	-0.00004994	415	-0.02982	428	6,126.34
(K)SFYEGDIYMLPVLK(E)	100%	76.97	25	76.97	2		837.9261	1,673.84	2	46,429.10	-0.00004994	415	-0.02982	428	6,223.46
(K)SFYEGDIYMLPVLK(E)	100%	77.05	25	77.05	2		837.9261	1,673.84	2	99,911.80	-0.00004994	415	-0.02982	428	5,893.34
(K)SFYEGDIYMLPVLK(E)	100%	63.64	25	63.64	2		837.9254	1,673.84	2	22,026.20	-0.001514	415	-0.9039	428	6,928.25
(K)SFYEGDIYMLPVLK(E)	100%	22.77	25	22.77	2		837.9251	1,673.84	2	3,538.24	-0.002002	415	-1.195	428	7,407.97
(K)SFYEGDIYmLPVLK(E)	100%	76.29	25	76.29	2	Oxidation (+16)	845.9236	1,689.83	2	31,497.80	0.00003105	415	0.01836	428	6,618.30
(K)SFYEGDIYmLPVLK(E)	100%	67.63	25	67.63	2	Oxidation (+16)	845.923	1,689.83	2	17,014.30	-0.001189	415	-0.7032	428	6,957.35
(K)SFYEGDIYMLPVLK(E)	100%	67.82	25	67.82	2		837.9255	1,673.84	2	1932590	-0.00127	415	-0.7582	428	5,622.16
(K)SFYEGDIYmLPVLK(E)	100%	64.21	25	64.21	2	Oxidation (+16)	845.9228	1,689.83	2	31,681.60	-0.001555	415	-0.9196	428	6,587.69
(K)SFYEGDIYmLPVLK(E)	100%	64.34	25	64.34	2	Oxidation (+16)	845.9229	1,689.83	2	5392110	-0.001433	415	-0.8475	428	5,110.37
(K)SFYEGDIYmLPVLK(E)	100%	64.39	25	64.39	2	Oxidation (+16)	845.9227	1,689.83	2	1070970	-0.001679	415	-0.993	428	5,283.74
(K)SFYEGDIYmLPVLK(E)	100%	56.83	25	56.83	2	Oxidation (+16)	845.9253	1,689.84	2	56,298.10	0.003449	415	2.04	428	6,316.50
(K)SFYEGDIYMLPVLK(E)	100%	64.54	25	64.54	2		837.9253	1,673.84	2	37,471.80	-0.001636	415	-0.9768	428	6,542.67
(K)SFYEGDIYMLPVLK(E)	100%	68.57	25	68.57	2		837.9271	1,673.84	2	34,872.10	0.001904	415	1.137	428	6,744.66
(K)SFYEGDIYMLPVLK(E)	100%	57.1	25	57.1	2		837.9278	1,673.84	2	43,105.60	0.003368	415	2.011	428	6,637.03
(K)SFYEGDIYmLPVLK(E)	100%	66.03	25	66.03	2	Oxidation (+16)	845.9228	1,689.83	2	1423670	-0.001555	415	-0.9196	428	5,251.31
(K)SFYEGDIYmLPVLK(E)	100%	72.29	25	72.29	2	Oxidation (+16)	845.9243	1,689.83	2	60,356.50	0.001373	415	0.8121	428	5,896.30
(K)SFYEGDIYmLPVLK(E)	100%	58.33	25	58.33	2	Oxidation (+16)	845.9225	1,689.83	2	10,199.00	-0.002045	415	-1.209	428	7,345.76
(K)SFYEGDIYMLPVLK(E)	100%	61.11	25	61.11	2		837.9274	1,673.84	2	102528	0.002514	415	1.501	428	6,325.46
(K)SFYEGDIYmLPVLK(E)	100%	31.63	25	31.63	2	Oxidation (+16)	845.9255	1,689.84	2	7,959.78	0.003937	415	2.328	428	7,360.84
(K)SFYEGDIYmLPVLK(E)	100%	72.52	25	72.52	2	Oxidation (+16)	845.9243	1,689.83	2	42,579.10	0.001373	415	0.8121	428	6,460.35
(K)SFYEGDIYmLPVLK(E)	100%	31.98	25	29.59	2	Oxidation (+16)	845.9256	1,689.84	2	4,338.32	0.004059	415	2.401	428	7,406.67
(K)SFYEGDIYmLPVLK(E)	100%	59.73	25	59.73	2	Oxidation (+16)	845.9225	1,689.83	2	21,271.10	-0.002045	415	-1.209	428	6,849.56
(K)SFYEGDIYmLPVLK(E)	100%	59.95	25	59.95	2	Oxidation (+16)	845.9226	1,689.83	2	460073	-0.001923	415	-1.137	428	5,561.41
(K)SFYEGDIYMLPVLK(E)	100%	50.39	25	50.39	2		837.928	1,673.84	2	18,162.80	0.003736	415	2.231	428	7,052.02
(K)SFYEGDIYmLPVLK(E)	100%	72.61	25	72.61	2	Oxidation (+16)	845.9244	1,689.83	2	38,830.00	0.001739	415	1.029	428	6,098.41
(K)SFYEGDIYMLPVLK(E)	100%	77.17	25	77.17	2		837.926	1,673.84	2	202898	-0.0002939	415	-0.1755	428	5,757.99
(K)SFYEGDIYmLPVLK(E)	100%	64.91	25	64.91	2	Oxidation (+16)	845.9249	1,689.84	2	41,424.60	0.002717	415	1.607	428	7,267.47
(K)SFYEGDIYMLPVLK(E)	100%	80.16	25	80.16	2		837.9263	1,673.84	2	20,911.80	0.0003181	415	0.1899	428	6,867.17
(K)SFYEGDIYMLPVLK(E)	100%	77.02	25	77.02	2		837.9263	1,673.84	2	88,804.90	0.0004401	415	0.2627	428	6,307.99
(K)SFYEGDIYMLPVLK(E)	100%	65.96	25	65.96	2		837.9274	1,673.84	2	33,558.00	0.002514	415	1.501	428	6,683.06
(K)SFYEGDIYMLPVLK(E)	100%	75.53	25	75.53	2		837.9259	1,673.84	2	20,616.60	-0.0004159	415	-0.2483	428	7,284.81
(K)SFYEGDIYMLPVLK(E)	100%	80.52	25	80.52	2		837.9263	1,673.84	2	97,469.70	0.0003181	415	0.1899	428	5,844.18
(K)SFYEGDIYMLPVLK(E)	100%	77	25	77	2		837.9265	1,673.84	2	60,785.30	0.0008061	415	0.4813	428	6,060.93
(K)SFYEGDIYMLPVLK(E)	100%	76.65	25	76.65	2		837.9258	1,673.84	2	34,459.10	-0.0006599	415	-0.394	428	5,531.08
(K)SFYEGDIYmLPVLK(E)	100%	60.62	25	60.62	2	Oxidation (+16)	845.9251	1,689.84	2	36,874.60	0.003083	415	1.823	428	6,196.28
(K)SFYEGDIYMLPVLK(E)	100%	80.3	25	80.3	2		837.926	1,673.84	2	52,636.80	-0.0001719	415	-0.1027	428	6,110.11
(K)SFYEGDIYmLPVLK(E)	100%	60.84	25	60.84	2	Oxidation (+16)	845.9251	1,689.84	2	37,890.60	0.003083	415	1.823	428	6,131.99
(K)SFYEGDIYMLPVLK(E)	100%	80.37	25	80.37	2		837.9261	1,673.84	2	243980	-0.00004994	415	-0.02982	428	5,740.93
(K)SFYEGDIYMLPVLK(E)	100%	61.06	25	61.06	2		837.9276	1,673.84	2	46,410.30	0.003002	415	1.792	428	6,462.26
(K)SFYEGDIYMLPVLK(E)	100%	77.04	25	77.04	2		837.9258	1,673.84	2	46,185.00	-0.0006599	415	-0.394	428	6,411.36
(K)SFYEGDIYMLPVLK(E)	100%	77.1	25	77.1	2		837.9257	1,673.84	2	339721	-0.0007819	415	-0.4669	428	5,690.35
(K)SFYEGDIYMLPVLK(E)	100%	77.1	25	77.1	2		837.9257	1,673.84	2	148202	-0.0007819	415	-0.4669	428	5,825.94
(K)SFYEGDIYmLPVLK(E)	100%	64.52	25	64.52	2	Oxidation (+16)	845.9227	1,689.83	2	1026730	-0.001801	415	-1.065	428	5,300.01
(K)SFYEGDIYMLPVLK(E)	100%	77.02	25	77.02	2		837.9267	1,673.84	2	79,696.10	0.001172	415	0.6998	428	5,944.69
(K)SFYEGDIYMLPVLK(E)	100%	63.84	25	63.84	2		837.9278	1,673.84	2	22,555.20	0.003368	415	2.011	428	6,912.87
(K)SFYEGDIYMLPVLK(E)	100%	80.89	25	80.89	2		837.9261	1,673.84	2	106643	0.00007206	415	0.04302	428	5,876.80
(K)SFYEGDIYmLPVLK(E)	100%	75.81	25	75.81	2	Oxidation (+16)	845.9231	1,689.83	2	720430	-0.000945	415	-0.5589	428	5,362.66
(K)SFYEGDIYMLPVLK(E)	100%	75.84	25	75.84	2		837.9256	1,673.84	2	9,255.69	-0.001026	415	-0.6126	428	7,331.57
(K)SFYEGDIYMLPVLK(E)	100%	65.2	25	65.2	2		837.9278	1,673.84	2	27,807.20	0.003368	415	2.011	428	6,760.00
(K)SFYEGDIYMLPVLK(E)	100%	54.51	25	54.51	2		837.9279	1,673.84	2	70,068.80	0.00349	415	2.084	428	6,273.74
(K)SFYEGDIYmLPVLK(E)	100%	76.23	25	76.23	2	Oxidation (+16)	845.9231	1,689.83	2	523661	-0.000945	415	-0.5589	428	5,529.49
(K)SFYEGDIYMLPVLK(E)	100%	79.54	25	79.54	2		837.9263	1,673.84	2	8,777.03	0.0004401	415	0.2627	428	7,316.38
(K)SFYEGDIYmLPVLK(E)	100%	67.51	25	67.51	2	Oxidation (+16)	845.9225	1,689.83	2	18,249.50	-0.002045	415	-1.209	428	6,911.62
(K)SFYEGDIYmLPVLK(E)	100%	80.2	25	80.2	2	Oxidation (+16)	845.9234	1,689.83	2	1053210	-0.000335	415	-0.1981	428	5,189.74
(K)SFYEGDIYmLPVLK(E)	100%	73.18	25	73.18	2	Oxidation (+16)	845.9229	1,689.83	2	556503	-0.001433	415	-0.8475	428	5,379.50
(K)SFYEGDIYMLPVLK(E)	100%	80.16	25	80.16	2		837.9265	1,673.84	2	47,284.10	0.0008061	415	0.4813	428	6,077.50
(K)SFYEGDIYMLPVLK(E)	100%	76.81	25	76.81	2		837.9269	1,673.84	2	51,174.60	0.00166	415	0.9912	428	6,159.35
(K)SFYEGDIYMLPVLK(E)	100%	80.1	25	80.1	2		837.9258	1,673.84	2	26,141.40	-0.0006599	415	-0.394	428	6,728.67
(K)SFYEGDIYMLPVLK(E)	100%	80.94	25	80.94	2		837.9263	1,673.84	2	61,045.60	0.0004401	415	0.2627	428	6,342.00
(K)SFYEGDIYMLPVLK(E)	100%	80	25	80	2		837.9257	1,673.84	2	21,254.80	-0.0007819	415	-0.4669	428	6,806.18
(K)SFYEGDIYmLPVLK(E)	100%	60.13	25	60.13	2	Oxidation (+16)	845.9223	1,689.83	2	7.20E+07	-0.002533	415	-1.498	428	5,064.79
(K)SFYEGDIYMLPVLK(E)	100%	81.13	25	81.13	2		837.9265	1,673.84	2	306585	0.0008061	415	0.4813	428	5,723.40
(K)SFYEGDIYMLPVLK(E)	100%	81.89	25	81.89	2		837.9264	1,673.84	2	7,184.95	0.0005621	415	0.3356	428	7,346.99
(K)SFYEGDIYMLPVLK(E)	100%	80.92	25	80.92	2		837.9258	1,673.84	2	56,548.70	-0.0006599	415	-0.394	428	6,359.82
(K)SFYEGDIYmLPVLK(E)	100%	75.96	25	75.96	2	Oxidation (+16)	845.9246	1,689.83	2	25,293.70	0.002107	415	1.246	428	6,864.79
(K)SFYEGDIYMLPVLK(E)	100%	77.16	25	77.16	2		837.927	1,673.84	2	48,142.10	0.001782	415	1.064	428	6,142.67
(K)SFYEGDIYMLPVLK(E)	100%	46.22	25	46.22	2		837.9293	1,673.84	2	23,881.90	0.006298	415	3.76	428	7,102.69
(K)SFYEGDIYMLPVLK(E)	100%	81.01	25	81.01	2		837.9265	1,673.84	2	83,314.20	0.0006841	415	0.4084	428	5,928.04
(K)SFYEGDIYMLPVLK(E)	100%	80.48	25	80.48	2		837.9259	1,673.84	2	63,028.90	-0.0004159	415	-0.2483	428	6,045.43
(K)SFYEGDIYMLPVLK(E)	100%	80.46	25	80.46	2		837.9267	1,673.84	2	63,737.30	0.001172	415	0.6998	428	6,093.92
(K)SFYEGDIYMLPVLK(E)	100%	80.6	25	80.6	2		837.9259	1,673.84	2	151912	-0.0004159	415	-0.2483	428	5,808.20
(K)SFYEGDIYMLPVLK(E)	100%	80.85	25	80.85	2		837.9259	1,673.84	2	37,238.50	-0.0004159	415	-0.2483	428	6,478.16
(K)SFYEGDIYmLPVLK(E)	100%	72.19	25	72.19	2	Oxidation (+16)	845.9226	1,689.83	2	20,985.90	-0.001923	415	-1.137	428	6,880.84
(K)SFYEGDIYmLPVLK(E)	100%	26.45	25	26.45	2	Oxidation (+16)	845.926	1,689.84	2	3,980.71	0.004791	415	2.834	428	7,421.69
(K)SFYEGDIYmLPVLK(E)	100%	72.41	25	72.41	2	Oxidation (+16)	845.9225	1,689.83	2	43,787.80	-0.002167	415	-1.282	428	6,408.01
(K)SFYEGDIYMLPVLK(E)	100%	76.99	25	76.99	2		837.9255	1,673.84	2	61,343.10	-0.001148	415	-0.6854	428	6,029.37
(K)SFYEGDIYMLPVLK(E)	100%	77.11	25	77.11	2		837.9255	1,673.84	2	528257	-0.00127	415	-0.7582	428	5,672.84
(K)SFYEGDIYmLPVLK(E)	100%	49.16	25	49.16	2	Oxidation (+16)	845.9266	1,689.84	2	15,319.20	0.006135	415	3.628	428	6,979.37
(K)SFYEGDIYmLPVLK(E)	100%	64.19	25	64.19	2	Oxidation (+16)	845.9222	1,689.83	2	3.24E+07	-0.002655	415	-1.57	428	5,079.97
(K)SFYEGDIYMLPVLK(E)	100%	29.91	25	29.91	2		837.9291	1,673.84	2	33,891.10	0.005932	415	3.542	428	7,226.89
(K)SFYEGDIYmLPVLK(E)	100%	80.55	25	80.55	2	Oxidation (+16)	845.9231	1,689.83	2	144660	-0.000945	415	-0.5589	428	5,607.94
(K)SFYEGDIYMLPVLK(E)	100%	73.26	25	73.26	2		837.9278	1,673.84	2	39,737.90	0.003368	415	2.011	428	7,267.26
(K)SFYEGDIYMLPVLK(E)	100%	83.24	25	83.24	2		837.9265	1,673.84	2	17,957.10	0.0008061	415	0.4813	428	7,008.94
(K)SFYEGDIYMLPVLK(E)	100%	79.27	25	79.27	2		837.9255	1,673.84	2	25,246.80	-0.001148	415	-0.6854	428	6,882.21
(K)SFYEGDIYmLPVLK(E)	100%	47.3	25	42.99	2	Oxidation (+16)	845.9271	1,689.84	2	18,614.20	0.006989	415	4.133	428	7,068.17
(K)SFYEGDIYMLPVLK(E)	100%	80.43	25	80.43	2		837.9255	1,673.84	2	1.90E+07	-0.00127	415	-0.7582	428	5,576.44
(K)SFYEGDIYMLPVLK(E)	100%	79.55	25	79.55	2		837.9253	1,673.84	2	15,052.20	-0.001636	415	-0.9768	428	7,300.60
(K)SFYEGDIYMLPVLK(E)	100%	84.67	25	84.67	2		837.9263	1,673.84	2	341322	0.0004401	415	0.2627	428	5,706.96
(K)SFYEGDIYMLPVLK(E)	100%	79.86	25	79.86	2		837.9253	1,673.84	2	20,993.40	-0.001636	415	-0.9768	428	6,821.23
(K)SFYEGDIYMLPVLK(E)	100%	80.38	25	80.38	2		837.9272	1,673.84	2	54,796.70	0.00227	415	1.355	428	6,012.77
(K)SFYEGDIYMLPVLK(E)	100%	76.93	25	76.93	2		837.925	1,673.84	2	27,363.20	-0.002124	415	-1.268	428	6,713.74
(K)SFYEGDIYmLPVLK(E)	100%	45	25	45	2	Oxidation (+16)	845.9276	1,689.84	2	28,483.70	0.007965	415	4.711	428	4,915.71
(K)SFYEGDIYmLPVLK(E)	100%	64.21	25	64.21	2	Oxidation (+16)	845.9257	1,689.84	2	26,688.10	0.004303	415	2.545	428	6,772.41
(K)SFYEGDIYMLPVLK(E)	100%	80.84	25	80.84	2		837.9274	1,673.84	2	48,834.00	0.002636	415	1.574	428	6,394.24
(K)SFYEGDIYMLPVLK(E)	100%	33.19	25	33.19	2		837.9299	1,673.85	2	27,726.20	0.007642	415	4.563	428	7,155.17
(K)SFYEGDIYMLPVLK(E)	100%	84.77	25	84.77	2		837.9269	1,673.84	2	76,732.60	0.001538	415	0.9183	428	5,962.33
(K)SFYEGDIYMLPVLK(E)	100%	60.84	25	60.84	2		837.929	1,673.84	2	18,766.70	0.005688	415	3.396	428	7,068.39
(K)SFYEGDIYmLPVLK(E)	100%	80.4	25	80.4	2	Oxidation (+16)	845.9225	1,689.83	2	2955880	-0.002167	415	-1.282	428	5,125.52
(K)SFYEGDIYMLPVLK(E)	100%	80.02	25	80.02	2		837.9276	1,673.84	2	31,467.20	0.003002	415	1.792	428	6,652.32
(K)SFYEGDIYMLPVLK(E)	100%	80.53	25	80.53	2		837.9252	1,673.84	2	22,298.70	-0.001758	415	-1.05	428	6,851.55
(K)SFYEGDIYmLPVLK(E)	100%	75.93	25	75.93	2	Oxidation (+16)	845.9222	1,689.83	2	6.61E+07	-0.002655	415	-1.57	428	5,049.67
(K)SFYEGDIYMLPVLK(E)	100%	83.61	25	83.61	2		837.9254	1,673.84	2	17,412.90	-0.001392	415	-0.8311	428	6,943.44
(K)SFYEGDIYMLPVLK(E)	100%	66.34	25	66.34	2		837.9288	1,673.84	2	12,103.00	0.005322	415	3.178	428	6,979.14
(K)SFYEGDIYmLPVLK(E)	100%	72.47	25	72.47	2	Oxidation (+16)	845.9258	1,689.84	2	67,688.10	0.004425	415	2.617	428	5,849.91
(K)SFYEGDIYMLPVLK(E)	100%	79.87	25	79.87	2		837.9247	1,673.83	2	17,617.50	-0.002734	415	-1.632	428	6,958.51
(K)SFYEGDIYMLPVLK(E)	100%	80.18	25	80.18	2		837.9247	1,673.83	2	32,677.90	-0.002734	415	-1.632	428	6,590.02
(K)SFYEGDIYmLPVLK(E)	100%	75.74	25	75.74	2	Oxidation (+16)	845.9221	1,689.83	2	184408	-0.003021	415	-1.787	428	5,592.60
(K)SFYEGDIYMLPVLK(E)	100%	80.31	25	80.31	2		837.9249	1,673.84	2	5.66E+07	-0.00249	415	-1.487	428	5,546.02
(K)SFYEGDIYMLPVLK(E)	100%	83.99	25	83.99	2		837.925	1,673.84	2	5.60E+07	-0.002124	415	-1.268	428	5,561.19
(K)SFYEGDIYMLPVLK(E)	100%	84.05	25	84.05	2		837.925	1,673.84	2	822800	-0.002124	415	-1.268	428	5,607.04
(K)SFYEGDIYMLPVLK(E)	100%	76.9	25	76.9	2		837.9246	1,673.83	2	46,764.30	-0.002978	415	-1.778	428	6,429.48
(K)SFYEGDIYMLPVLK(E)	100%	67.02	25	67.02	2		837.9235	1,673.83	2	22,379.90	-0.005298	415	-3.163	428	6,897.37
(K)SFYEGDIYMLPVLK(E)	100%	84.53	25	84.53	2		837.9252	1,673.84	2	2046950	-0.00188	415	-1.122	428	5,591.83
(K)SFYEGDIYmLPVLK(E)	100%	72.33	25	72.33	2	Oxidation (+16)	845.9213	1,689.83	2	654413	-0.004485	415	-2.653	428	5,544.89
(K)SFYEGDIYMLPVLK(E)	100%	93.38	25	93.38	2		837.9264	1,673.84	2	46,089.80	0.0005621	415	0.3356	428	6,190.24
(K)SFYEGDIYMLPVLK(E)	100%	97.95	25	97.95	2		837.926	1,673.84	2	173105	-0.0002939	415	-0.1755	428	5,792.32
(K)SFYEGDIYMLPVLK(E)	100%	93.34	25	93.34	2		837.9255	1,673.84	2	34,670.00	-0.001148	415	-0.6854	428	6,527.20
(K)SFYEGDIYMLPVLK(E)	99%	102.19	25	102.19	2		837.9267	1,673.84	2	95,833.30	0.001172	415	0.6998	428	5,911.53
(K)SFYEGDIYMLPVLK(E)	96%	17.89	25	17.89	2		837.9222	1,673.83	2	15,973.90	-0.007862	415	-4.694	428	5,463.61
(K)SFYEGDIYMLPVLK(E)	93%	14.84	25	14.84	2		837.9289	1,673.84	2	22,249.90	0.005566	415	3.323	428	7,133.51
(K)SFYEGDIYmLPVLK(E)	91%	14.87	25	14.87	2	Oxidation (+16)	845.9269	1,689.84	2	22,467.70	0.006623	415	3.917	428	7,052.24
(K)SFYEGDIYmLPVLKE(S)	98%	14.71	25	14.71	1	Oxidation (+16)	910.4442	1,818.87	2	14,412.90	-0.001309	415	-0.7193	429	5,134.69
(K)SFYEGDIYMLPVLKESYWEVK(L)	100%	52.06	25	52.06	2		866.0945	2,595.26	3	27,829.20	0.0009311	415	0.3586	435	5,948.48
(K)SFYEGDIYMLPVLKESYWEVK(L)	100%	52.2	25	52.2	2		866.0945	2,595.26	3	114619	0.0009311	415	0.3586	435	5,931.66
(K)SFYEGDIYMLPVLKESYWEVK(L)	100%	34.16	25	34.16	2		866.0951	2,595.26	3	12,554.40	0.002581	415	0.9941	435	5,965.06
(K)SFYEGDIYmLPVLKESYWEVK(L)	100%	45.1	25	45.1	2	Oxidation (+16)	871.4268	2,611.26	3	32,828.60	0.002661	415	1.019	435	5,535.84
(K)SFYEGDIYmLPVLKESYWEVK(L)	100%	23.42	25	23.42	2	Oxidation (+16)	871.4265	2,611.26	3	14,730.50	0.001929	415	0.7385	435	5,627.87
(K)SFYEGDIYMLPVLKESYWEVK(L)	100%	26.88	25	26.88	2		866.0953	2,595.26	3	10,049.50	0.003313	415	1.276	435	5,984.90
(K)SFYEGDIYmLPVLKESYWEVK(L)	100%	48.11	25	48.11	2	Oxidation (+16)	871.4274	2,611.26	3	46,897.60	0.004674	415	1.789	435	5,578.36
(K)SFYEGDIYMLPVLKESYWEVK(L)	100%	52.88	25	52.88	2		866.0956	2,595.27	3	16,929.60	0.004228	415	1.629	435	5,915.21
(K)SFYEGDIYmLPVLKESYWEVK(L)	100%	36.82	25	36.82	2	Oxidation (+16)	871.4241	2,611.25	3	236467	-0.005214	415	-1.996	435	5,553.99
(K)SFYEGDIYmLPVLKESYWEVK(L)	100%	30.5	25	30.5	2	Oxidation (+16)	871.4282	2,611.26	3	18,947.10	0.006873	415	2.631	435	5,595.79
(K)SFYEGDIYmLPVLKESYWEVK(L)	100%	25.09	25	25.09	2	Oxidation (+16)	871.4221	2,611.24	3	19,764.60	-0.01126	415	-4.309	435	5,612.20
(K)SFYEGDIYmLPVLKESYWEVK(L)	99%	15.02	25	15.02	2	Oxidation (+16)	871.4265	2,611.26	3	17,861.40	0.001929	415	0.7385	435	5,718.17
(K)SFYEGDIYmLPVLKESYWEVK(L)	99%	14.77	25	14.77	2	Oxidation (+16)	871.4264	2,611.26	3	13,503.90	0.001563	415	0.5984	435	5,737.38
(K)SFYEGDIYmLPVLKESYWEVK(L)	98%	19.81	25	19.81	2	Oxidation (+16)	871.4232	2,611.25	3	11,774.00	-0.008142	415	-3.117	435	5,645.86
(K)SFYEGDIYmLPVLKESYWEVK(L)	98%	15.07	25	15.07	2	Oxidation (+16)	871.4268	2,611.26	3	12,547.60	0.002844	415	1.089	435	5,700.56
(K)SFYEGDIYmLPVLKESYWEVKLDELYIGK(E)	100%	43.66	25	43.66	2	Oxidation (+16)	886.6973	3,542.76	4	20,399.60	0.002719	415	0.7673	443	6,309.97
(S)FYEGDIYmLPVLK(E)	100%	31.51	25	31.51	1	Oxidation (+16)	802.4081	1,602.80	2	36,966.20	0.001025	416	0.6391	428	4,922.54
(S)FYEGDIYMLPVLK(E)	100%	33.15	25	33.15	1		794.4098	1,586.81	2	25,497.40	-0.0006419	416	-0.4043	428	5,428.36
(S)FYEGDIYmLPVLK(E)	100%	64	25	64	1	Oxidation (+16)	802.4085	1,602.80	2	38,510.10	0.001879	416	1.172	428	4,903.37
(F)YEGDIYmLPVLK(E)	100%	40.43	25	40.43	1	Oxidation (+16)	728.874	1,455.73	2	55,288.40	0.001187	417	0.8149	428	4,326.92
(F)YEGDIYMLPVLK(E)	100%	56.3	25	55.91	1		720.8762	1,439.74	2	319535	0.0004981	417	0.3457	428	5,600.07
(F)YEGDIYmLPVLK(E)	100%	32.73	25	32.73	1	Oxidation (+16)	728.8728	1,455.73	2	1889300	-0.001131	417	-0.7764	428	5,083.53
(F)YEGDIYMLPVLK(E)	100%	57.86	25	56.12	1		720.8763	1,439.74	2	3802310	0.0008641	417	0.5997	428	5,553.33
(F)YEGDIYmLPVLK(E)	100%	23.58	25	23.58	1	Oxidation (+16)	728.8737	1,455.73	2	2553470	0.000577	417	0.3961	428	5,044.75
(F)YEGDIYmLPVLK(E)	100%	32.67	25	32.67	1	Oxidation (+16)	728.8725	1,455.73	2	4002180	-0.001741	417	-1.195	428	5,067.37
(F)YEGDIYMLPVLK(E)	100%	60.77	25	58.73	1		720.8768	1,439.74	2	2032810	0.001718	417	1.192	428	5,571.56
(F)YEGDIYmLPVLK(E)	100%	53.61	25	53.61	1	Oxidation (+16)	728.8746	1,455.73	2	123686	0.002531	417	1.737	428	5,286.31
(F)YEGDIYmLPVLK(E)	100%	48.22	25	48.22	1	Oxidation (+16)	728.8762	1,455.74	2	783627	0.005583	417	3.833	428	5,101.35
(F)YEGDIYMLPVLK(E)	100%	56.21	25	55.86	1		720.8732	1,439.73	2	104847	-0.005484	417	-3.806	428	5,638.12
(Y)EGDIYmLPVLK(E)	100%	46.31	25	46.31	1	Oxidation (+16)	647.3412	1,292.67	2	28,932.30	-0.001063	418	-0.8217	428	4,040.93
(E)GDIYmLPVLK(E)	100%	45.21	25	43.83	1	Oxidation (+16)	582.8205	1,163.63	2	20,014.50	0.000155	419	0.1331	428	3,922.24
(E)GDIYMLPVLK(E)	100%	34.81	25	34.81	1		574.822	1,147.63	2	18,174.50	-0.00188	419	-1.637	428	4,447.13
(G)DIYmLPVLK(E)	100%	29.88	25	29.88	1	Oxidation (+16)	554.3098	1,106.61	2	68,713.90	0.000169	420	0.1526	428	4,238.71
(G)DIYmLPVLK(E)	100%	27.47	25	27.47	1	Oxidation (+16)	554.3099	1,106.61	2	30,361.20	0.000413	420	0.3729	428	4,221.74
(G)DIYmLPVLK(E)	100%	27.54	25	27.54	1	Oxidation (+16)	554.3093	1,106.60	2	30,673.60	-0.000685	420	-0.6184	428	4,255.44
(G)DIYMLPVLK(E)	100%	29.23	25	29.23	1		546.3118	1,090.61	2	30,003.50	-0.0007639	420	-0.6998	428	4,816.11
(D)IYmLPVLK(E)	99%	35.64	25	35.64	1	Oxidation (+16)	496.795	991.5754	2	18,552.20	-0.002371	421	-2.389	428	3,583.52
(D)IYmLPVLK(E)	99%	35.35	25	32.85	1	Oxidation (+16)	496.7959	991.5772	2	74,519.90	-0.000601	421	-0.6054	428	3,534.18
(D)IYMLPVLK(E)	99%	33.75	25	33.44	1		488.7979	975.5813	2	15,252.20	-0.001596	421	-1.634	428	4,200.58
(D)IYMLPVLK(E)	99%	33.99	25	31.45	1		488.7982	975.5818	2	30,649.40	-0.001048	421	-1.073	428	4,145.11
(D)IYmLPVLK(E)	99%	33.02	25	32.48	1	Oxidation (+16)	496.7959	991.5772	2	51,891.30	-0.000541	421	-0.545	428	3,549.53
(D)IYmLPVLK(E)	99%	29.81	25	29.81	1	Oxidation (+16)	496.7964	991.5782	2	28,872.10	0.000437	421	0.4403	428	3,518.43
(D)IYMLPVLK(E)	99%	28.39	25	28.39	1		488.7986	975.5827	2	34,595.70	-0.0001919	421	-0.1965	428	4,162.11
(D)IYmLPVLK(E)	99%	24.59	25	24.59	1	Oxidation (+16)	496.7967	991.5789	2	21,874.10	0.001107	421	1.115	428	3,566.05
(D)IYmLPVLK(E)	99%	22.1	25	22.1	1	Oxidation (+16)	496.796	991.5774	2	18,148.10	-0.000419	421	-0.4221	428	3,607.82
(D)IYmLPVLK(E)	99%	21.69	25	21.69	1	Oxidation (+16)	496.7969	991.5793	2	14,662.50	0.001535	421	1.547	428	3,771.67
(D)IYMLPVLK(E)	99%	20.78	25	20.78	1		488.7988	975.583	2	17,664.80	0.0001121	421	0.1147	428	4,180.62
(D)IYmLPVLK(E)	99%	18.71	25	18.71	1	Oxidation (+16)	496.7964	991.5782	2	18,308.40	0.000437	421	0.4403	428	3,625.64
(D)IYmLPVLK(E)	99%	15.59	25	15.59	1	Oxidation (+16)	496.7963	991.578	2	18,168.60	0.000193	421	0.1945	428	3,709.01
(D)IYmLPVLK(E)	98%	19.38	25	19.38	1	Oxidation (+16)	496.7946	991.5747	2	17,461.90	-0.003103	421	-3.126	428	3,751.28
(D)IYmLPVLK(E)	98%	19.37	25	17.18	1	Oxidation (+16)	496.7944	991.5742	2	14,885.20	-0.003591	421	-3.618	428	3,727.67
(K)ESYWEVKLD(E)	100%	27.83	25	27.83	1		584.7787	1,167.54	2	26,653.90	-0.002048	429	-1.753	437	3,714.40
(K)ESYWEVKLDELYIGK(E)	100%	40.22	25	40.22	2		624.6541	1,870.94	3	15,707.40	0.004861	429	2.597	443	6,365.12
(K)ESYWEVKLDELYIGK(E)	100%	40.41	25	40.41	2		624.6508	1,870.93	3	20,381.20	-0.004844	429	-2.588	443	5,268.51
(K)ESYWEVKLDELYIGK(E)	100%	39.15	25	39.15	2		624.6528	1,870.94	3	15,417.00	0.001198	429	0.64	443	5,377.57
(K)ESYWEVKLDELYIGK(E)	100%	39.15	25	39.15	2		624.653	1,870.94	3	12,049.80	0.001747	429	0.9333	443	5,767.27
(K)ESYWEVKLDELYIGK(E)	100%	38.8	25	38.8	2		624.6526	1,870.94	3	14,535.80	0.0004661	429	0.249	443	6,292.41
(K)ESYWEVKLDELYIGK(E)	100%	41.51	25	41.51	2		936.4725	1,870.93	2	39,021.90	-0.004954	429	-2.646	443	4,930.77
(K)ESYWEVKLDELYIGK(E)	100%	38.05	25	38.05	2		624.6521	1,870.93	3	14,547.10	-0.0009979	429	-0.5331	443	5,437.51
(K)ESYWEVKLDELYIGK(E)	100%	38	25	38	2		624.6531	1,870.94	3	19,143.90	0.00193	429	1.031	443	5,308.63
(K)ESYWEVKLDELYIGK(E)	100%	37.99	25	37.99	2		624.6519	1,870.93	3	13,027.00	-0.001547	429	-0.8264	443	6,259.09
(K)ESYWEVKLDELYIGK(E)	100%	41.93	25	41.93	2		624.6535	1,870.94	3	23,576.90	0.003211	429	1.715	443	5,209.37
(K)ESYWEVKLDELYIGK(E)	100%	37.83	25	37.83	2		624.6535	1,870.94	3	12,182.50	0.003211	429	1.715	443	6,239.68
(K)ESYWEVKLDELYIGK(E)	100%	35.5	25	35.5	2		624.6525	1,870.94	3	10,319.50	0.0002831	429	0.1512	443	5,985.23
(K)ESYWEVKLDELYIGK(E)	100%	34.88	25	34.44	2		624.6524	1,870.94	3	12,980.90	-0.00008294	429	-0.04431	443	6,276.00
(K)ESYWEVKLDELYIGK(E)	100%	47.05	25	47.05	2		624.6525	1,870.94	3	16,910.10	0.0002831	429	0.1512	443	6,540.41
(K)ESYWEVKLDELYIGK(E)	100%	43.4	25	43.4	2		624.6525	1,870.94	3	14,637.10	0.0001001	429	0.05345	443	6,423.41
(K)ESYWEVKLDELYIGK(E)	100%	36.45	25	34.42	2		624.6525	1,870.94	3	10,663.00	0.0001001	429	0.05345	443	6,182.89
(K)ESYWEVKLDELYIGK(E)	100%	33.18	25	33.18	2		624.6524	1,870.94	3	14,960.20	-0.00008294	429	-0.04431	443	5,638.01
(K)ESYWEVKLDELYIGK(E)	100%	36.18	25	36.18	2		624.6528	1,870.94	3	25,852.00	0.001198	429	0.64	443	5,187.33
(K)ESYWEVKLDELYIGK(E)	100%	35.65	25	33.23	2		624.6528	1,870.94	3	30,443.90	0.001198	429	0.64	443	5,120.86
(K)ESYWEVKLDELYIGK(E)	100%	46.27	25	46.27	2		624.6526	1,870.94	3	20,162.30	0.0006491	429	0.3467	443	5,240.66
(K)ESYWEVKLDELYIGK(E)	100%	45.78	25	45.78	2		624.6526	1,870.94	3	12,829.10	0.0004661	429	0.249	443	5,661.05
(K)ESYWEVKLDELYIGK(E)	100%	37.55	25	37.55	2		624.6522	1,870.93	3	15,868.80	-0.0008149	429	-0.4353	443	5,359.08
(K)ESYWEVKLDELYIGK(E)	100%	47.55	25	47.55	2		624.6526	1,870.94	3	48,643.80	0.0006491	429	0.3467	443	5,020.26
(K)ESYWEVKLDELYIGK(E)	100%	44.35	25	44.35	2		624.6522	1,870.93	3	14,330.10	-0.0008149	429	-0.4353	443	6,220.74
(K)ESYWEVKLDELYIGK(E)	100%	36.68	25	36.68	2		624.6523	1,870.94	3	14,032.40	-0.0004489	429	-0.2398	443	5,478.48
(K)ESYWEVKLDELYIGK(E)	100%	49.16	25	49.16	2		624.6528	1,870.94	3	49,148.80	0.001198	429	0.64	443	5,002.52
(K)ESYWEVKLDELYIGK(E)	100%	32.43	25	32.43	2		624.6523	1,870.94	3	12,111.80	-0.0004489	429	-0.2398	443	5,796.30
(K)ESYWEVKLDELYIGK(E)	100%	35.57	25	35.57	2		624.652	1,870.93	3	11,862.40	-0.001181	429	-0.6309	443	6,203.63
(K)ESYWEVKLDELYIGK(E)	100%	34.95	25	34.95	2		624.652	1,870.93	3	15,678.10	-0.001181	429	-0.6309	443	5,527.92
(K)ESYWEVKLDELYIGK(E)	100%	49.87	25	49.87	2		624.6527	1,870.94	3	529127	0.0008321	429	0.4445	443	4,875.36
(K)ESYWEVKLDELYIGK(E)	100%	46.98	25	46.98	2		624.6521	1,870.93	3	106002	-0.0009979	429	-0.5331	443	4,824.57
(K)ESYWEVKLDELYIGK(E)	100%	46.35	25	46.35	2		624.653	1,870.94	3	39,154.50	0.001747	429	0.9333	443	5,038.73
(K)ESYWEVKLDELYIGK(E)	100%	48.32	25	48.32	2		624.6521	1,870.93	3	6338610	-0.0009979	429	-0.5331	443	4,857.38
(K)ESYWEVKLDELYIGK(E)	100%	54.11	25	54.11	2		624.6526	1,870.94	3	11,329.60	0.0004661	429	0.249	443	5,510.25
(K)ESYWEVKLDELYIGK(E)	100%	25.4	25	25.4	2		624.6528	1,870.94	3	17,312.70	0.001198	429	0.64	443	5,413.07
(K)ESYWEVKLDELYIGK(E)	100%	24.49	25	24.49	2		624.6526	1,870.94	3	16,303.80	0.0004661	429	0.249	443	6,604.21
(K)ESYWEVKLDELYIGK(E)	100%	45.21	25	45.21	2		624.6531	1,870.94	3	16,298.70	0.002113	429	1.129	443	6,403.43
(K)ESYWEVKLDELYIGK(E)	100%	37.79	25	37.79	2		624.6519	1,870.93	3	18,344.10	-0.001733	429	-0.9257	443	6,508.26
(K)ESYWEVKLDELYIGK(E)	100%	36.08	25	36.08	2		624.6533	1,870.94	3	35,320.10	0.002479	429	1.324	443	5,093.65
(K)ESYWEVKLDELYIGK(E)	100%	58.6	25	58.6	2		624.6525	1,870.94	3	83,138.50	0.0001001	429	0.05345	443	4,945.99
(K)ESYWEVKLDELYIGK(E)	100%	29.32	25	29.32	2		624.653	1,870.94	3	11,280.70	0.001747	429	0.9333	443	6,109.56
(K)ESYWEVKLDELYIGK(E)	100%	31.96	25	31.96	2		624.6519	1,870.93	3	14,787.40	-0.001547	429	-0.8264	443	6,714.99
(K)ESYWEVKLDELYIGK(E)	100%	31.88	25	31.88	2		624.6532	1,870.94	3	18,278.80	0.002296	429	1.227	443	6,473.67
(K)ESYWEVKLDELYIGK(E)	100%	24.82	25	24.82	2		624.6529	1,870.94	3	13,089.40	0.001381	429	0.7378	443	5,747.82
(K)ESYWEVKLDELYIGK(E)	100%	26.34	25	26.34	2		624.653	1,870.94	3	10,374.40	0.001747	429	0.9333	443	6,005.26
(K)ESYWEVKLDELYIGK(E)	100%	29.36	25	29.36	2		624.6531	1,870.94	3	11,934.10	0.002113	429	1.129	443	5,707.54
(K)ESYWEVKLDELYIGK(E)	100%	59.61	25	59.61	2		624.6526	1,870.94	3	84,907.90	0.0004661	429	0.249	443	4,965.32
(K)ESYWEVKLDELYIGK(E)	100%	23.57	25	23.57	2		624.652	1,870.93	3	23,890.70	-0.001181	429	-0.6309	443	6,585.90
(K)ESYWEVKLDELYIGK(E)	100%	28.3	25	25.93	2		624.6533	1,870.94	3	19,353.10	0.002479	429	1.324	443	6,490.89
(K)ESYWEVKLDELYIGK(E)	100%	37.04	25	37.04	2		624.6516	1,870.93	3	13,830.50	-0.002465	429	-1.317	443	6,342.68
(K)ESYWEVKLDELYIGK(E)	100%	42.65	25	42.65	2		624.6536	1,870.94	3	13,042.40	0.003577	429	1.911	443	6,317.61
(K)ESYWEVKLDELYIGK(E)	100%	35.57	25	35.57	2		624.6536	1,870.94	3	11,556.00	0.003577	429	1.911	443	6,070.94
(K)ESYWEVKLDELYIGK(E)	100%	46.48	25	46.48	2		624.6517	1,870.93	3	20,642.30	-0.002282	429	-1.219	443	5,290.08
(K)ESYWEVKLDELYIGK(E)	100%	33.09	25	33.09	2		624.6517	1,870.93	3	12,259.30	-0.002099	429	-1.121	443	5,683.17
(K)ESYWEVKLDELYIGK(E)	100%	46.83	25	46.83	2		624.6517	1,870.93	3	19,273.20	-0.002282	429	-1.219	443	5,334.68
(K)ESYWEVKLDELYIGK(E)	100%	23.88	25	23.88	2		624.652	1,870.93	3	18,228.80	-0.001364	429	-0.7286	443	6,525.00
(K)ESYWEVKLDELYIGK(E)	100%	69.62	25	69.62	2		624.6523	1,870.94	3	65,354.10	-0.0002659	429	-0.1421	443	4,984.22
(K)ESYWEVKLDELYIGK(E)	100%	23.12	25	23.12	2		624.652	1,870.93	3	16,110.00	-0.001364	429	-0.7286	443	6,447.84
(K)ESYWEVKLDELYIGK(E)	100%	64.96	25	64.96	2		936.4745	1,870.93	2	3934590	-0.0009259	429	-0.4946	443	4,840.34
(K)ESYWEVKLDELYIGK(E)	100%	24.04	25	24.04	2		624.6533	1,870.94	3	12,568.90	0.002479	429	1.324	443	5,727.46
(K)ESYWEVKLDELYIGK(E)	100%	24.17	25	24.17	2		624.6519	1,870.93	3	9,554.66	-0.001733	429	-0.9257	443	6,048.54
(K)ESYWEVKLDELYIGK(E)	100%	28.58	25	28.58	2		624.6516	1,870.93	3	11,543.40	-0.002465	429	-1.317	443	6,028.25
(K)ESYWEVKLDELYIGK(E)	100%	74.25	25	74.25	2		624.6524	1,870.94	3	132850	-0.00008294	429	-0.04431	443	4,910.66
(K)ESYWEVKLDELYIGK(E)	100%	70.56	25	70.56	2		624.6529	1,870.94	3	323354	0.001381	429	0.7378	443	4,892.75
(K)ESYWEVKLDELYIGK(E)	100%	59.42	25	59.42	2		624.6518	1,870.93	3	21,747.20	-0.001916	429	-1.024	443	5,168.54
(K)ESYWEVKLDELYIGK(E)	100%	22.22	25	22.22	2		624.6534	1,870.94	3	9,162.02	0.003028	429	1.618	443	5,838.16
(K)ESYWEVKLDELYIGK(E)	100%	44.24	25	44.24	2		624.6538	1,870.94	3	16,094.30	0.004129	429	2.206	443	5,396.25
(K)ESYWEVKLDELYIGK(E)	100%	24.15	25	24.15	2		624.6536	1,870.94	3	10,871.20	0.003394	429	1.813	443	6,087.25
(K)ESYWEVKLDELYIGK(E)	100%	45.01	25	45.01	2		624.6513	1,870.93	3	14,908.00	-0.00338	429	-1.806	443	6,383.38
(K)ESYWEVKLDELYIGK(E)	100%	33.69	25	33.69	2		624.6513	1,870.93	3	29,959.80	-0.00338	429	-1.806	443	5,149.34
(K)ESYWEVKLDELYIGK(E)	100%	54.13	25	54.13	2		936.4731	1,870.93	2	8,975.24	-0.003856	429	-2.06	443	6,647.94
(K)ESYWEVKLDELYIGK(E)	100%	21.84	25	21.84	2		624.6524	1,870.94	3	11,993.00	-0.00008294	429	-0.04431	443	5,872.41
(K)ESYWEVKLDELYIGK(E)	100%	22.98	25	22.98	2		624.6541	1,870.94	3	17,482.70	0.004861	429	2.597	443	6,684.86
(K)ESYWEVKLDELYIGK(E)	100%	23.16	25	23.16	2		624.6544	1,870.94	3	33,209.20	0.005959	429	3.183	443	6,569.49
(K)ESYWEVKLDELYIGK(E)	100%	21.27	25	21.27	2		624.6523	1,870.94	3	17,749.40	-0.0004489	429	-0.2398	443	6,767.32
(K)ESYWEVKLDELYIGK(E)	100%	58.66	25	58.66	2		936.4781	1,870.94	2	12,108.30	0.006154	429	3.288	443	6,664.04
(K)ESYWEVKLDELYIGK(E)	100%	26.24	25	26.24	2		624.6485	1,870.92	3	27,393.50	-0.0118	429	-6.304	443	4,481.32
(K)ESYWEVKLDELYIGK(E)	100%	19.78	25	19.78	2		624.6525	1,870.94	3	10,843.50	0.0002831	429	0.1512	443	6,160.81
(K)ESYWEVKLDELYIGK(E)	100%	19.01	25	19.01	2		624.6525	1,870.94	3	13,073.70	0.0001001	429	0.05345	443	5,818.14
(K)ESYWEVKLDELYIGK(E)	100%	20.35	25	20.35	2		624.6528	1,870.94	3	8,413.91	0.001198	429	0.64	443	6,143.23
(K)ESYWEVKLDELYIGK(E)	99%	19.19	25	19.19	2		624.6536	1,870.94	3	9,456.04	0.003577	429	1.911	443	5,890.65
(K)ESYWEVKLDELYIGK(E)	99%	18.12	25	18.12	2		624.653	1,870.94	3	16,525.90	0.001564	429	0.8355	443	6,817.32
(K)ESYWEVKLDELYIGK(E)	94%	12.66	25	12.66	2		624.652	1,870.93	3	14,149.10	-0.001181	429	-0.6309	443	6,836.52
(K)ESYWEVKLDELYIGK(E)	94%	16.36	25	16.36	2		936.4656	1,870.92	2	5,842.69	-0.01875	429	-10.02	443	5,847.39
(K)ESYWEVKLDELYIGKER(I)	100%	38.75	25	38.75	2		719.7015	2,156.08	3	21,392.30	0.003616	429	1.676	445	6,338.03
(K)ESYWEVKLDELYIGKER(I)	100%	38.45	25	38.45	2		719.7003	2,156.08	3	12,112.90	-0.00004694	429	-0.02176	445	6,223.80
(K)ESYWEVKLDELYIGKER(I)	100%	41.52	25	41.52	2		719.7019	2,156.08	3	17,412.20	0.004714	429	2.185	445	6,369.02
(K)ESYWEVKLDELYIGKER(I)	100%	41.74	25	41.74	2		719.6931	2,156.06	3	25,896.20	-0.02165	429	-10.04	445	5,522.23
(K)ESYWEVKLDELYIGKER(I)	100%	37.61	25	36.76	2		719.7004	2,156.08	3	14,283.60	0.0003191	429	0.1479	445	6,155.98
(K)ESYWEVKLDELYIGKER(I)	100%	44.1	25	44.1	2		719.7003	2,156.08	3	9,996.55	-0.00004694	429	-0.02176	445	6,906.98
(K)ESYWEVKLDELYIGKER(I)	100%	34.27	25	34.27	2		719.7003	2,156.08	3	15,820.90	-0.00004694	429	-0.02176	445	6,801.76
(K)ESYWEVKLDELYIGKER(I)	100%	47.96	25	40.12	2		719.7003	2,156.08	3	12,563.50	-0.00004694	429	-0.02176	445	6,188.08
(K)ESYWEVKLDELYIGKER(I)	100%	27.52	25	27.52	2		719.7004	2,156.08	3	13,448.70	0.0001361	429	0.06307	445	6,017.71
(K)ESYWEVKLDELYIGKER(I)	100%	36.25	25	36.25	2		719.7007	2,156.08	3	14,573.90	0.001237	429	0.5735	445	6,241.99
(K)ESYWEVKLDELYIGKER(I)	100%	45.22	25	45.22	2		719.7002	2,156.08	3	17,821.30	-0.0004129	429	-0.1914	445	6,613.62
(K)ESYWEVKLDELYIGKER(I)	100%	44.91	25	44.91	2		719.7006	2,156.08	3	16,992.10	0.0006881	429	0.319	445	6,822.83
(K)ESYWEVKLDELYIGKER(I)	100%	51.86	25	51.15	2		719.7004	2,156.08	3	18,337.00	0.0003191	429	0.1479	445	6,650.06
(K)ESYWEVKLDELYIGKER(I)	100%	52.14	25	51.17	2		719.7004	2,156.08	3	19,086.80	0.0003191	429	0.1479	445	6,461.49
(K)ESYWEVKLDELYIGKER(I)	100%	44.96	25	38.76	2		719.7006	2,156.08	3	10,771.30	0.0008711	429	0.4038	445	6,171.89
(K)ESYWEVKLDELYIGKER(I)	100%	45.04	25	36.87	2		719.7001	2,156.08	3	14,467.00	-0.0005959	429	-0.2763	445	5,796.63
(K)ESYWEVKLDELYIGKER(I)	100%	51.08	25	40.19	2		719.7006	2,156.08	3	16,062.30	0.0006881	429	0.319	445	6,511.05
(K)ESYWEVKLDELYIGKER(I)	100%	49.34	25	47.42	2		719.7008	2,156.08	3	15,980.70	0.00142	429	0.6583	445	6,494.62
(K)ESYWEVKLDELYIGKER(I)	100%	46.73	25	46.25	2		719.7009	2,156.08	3	18,595.80	0.001603	429	0.7432	445	6,426.52
(K)ESYWEVKLDELYIGKER(I)	100%	35.94	25	35.94	2		719.7009	2,156.08	3	19,866.30	0.001786	429	0.828	445	5,488.03
(K)ESYWEVKLDELYIGKER(I)	100%	31.6	25	21.08	2		719.7008	2,156.08	3	11,472.40	0.00142	429	0.6583	445	6,062.16
(K)ESYWEVKLDELYIGKER(I)	100%	42.92	25	42.01	2		719.7011	2,156.08	3	13,889.60	0.002335	429	1.083	445	6,443.15
(K)ESYWEVKLDELYIGKER(I)	100%	43.37	25	41.82	2		719.7011	2,156.08	3	13,572.70	0.002335	429	1.083	445	6,759.88
(K)ESYWEVKLDELYIGKER(I)	100%	47.63	25	47.63	2		719.6999	2,156.08	3	19,295.80	-0.001328	429	-0.6156	445	6,559.88
(K)ESYWEVKLDELYIGKER(I)	100%	47.41	25	46.74	2		719.7009	2,156.08	3	11,355.50	0.001786	429	0.828	445	5,949.59
(K)ESYWEVKLDELYIGKER(I)	100%	53.24	25	53.24	2		719.7008	2,156.08	3	13,120.90	0.00142	429	0.6583	445	6,858.06
(K)ESYWEVKLDELYIGKER(I)	100%	33.68	25	25.34	2		719.7	2,156.08	3	12,553.60	-0.001145	429	-0.5308	445	6,139.08
(K)ESYWEVKLDELYIGKER(I)	100%	44.94	25	37.84	2		719.7014	2,156.08	3	10,793.50	0.003067	429	1.422	445	6,088.95
(K)ESYWEVKLDELYIGKER(I)	100%	56.83	25	56.83	2		719.7005	2,156.08	3	12,785.70	0.0005021	429	0.2327	445	6,258.75
(K)ESYWEVKLDELYIGKER(I)	100%	34.68	25	31.11	2		719.7013	2,156.08	3	15,323.30	0.002884	429	1.337	445	5,701.11
(K)ESYWEVKLDELYIGKER(I)	100%	65.78	25	62.86	2		719.7004	2,156.08	3	19,596.40	0.0003191	429	0.1479	445	6,527.55
(K)ESYWEVKLDELYIGKER(I)	100%	51.22	25	46.83	2		719.7013	2,156.08	3	14,985.20	0.002884	429	1.337	445	6,671.62
(K)ESYWEVKLDELYIGKER(I)	100%	45.59	25	45.59	2		719.7015	2,156.08	3	16,772.00	0.003433	429	1.592	445	6,701.51
(K)ESYWEVKLDELYIGKER(I)	100%	51.47	25	49.42	2		719.7014	2,156.08	3	15,887.00	0.003067	429	1.422	445	6,577.16
(K)ESYWEVKLDELYIGKER(I)	100%	58.68	25	43.33	2		719.701	2,156.08	3	12,554.20	0.001969	429	0.9128	445	6,204.42
(K)ESYWEVKLDELYIGKER(I)	100%	60.69	25	60.44	2		719.7005	2,156.08	3	16,397.00	0.0005021	429	0.2327	445	6,742.30
(K)ESYWEVKLDELYIGKER(I)	100%	61.55	25	59.77	2		719.7001	2,156.08	3	138251	-0.0007789	429	-0.3611	445	4,392.33
(K)ESYWEVKLDELYIGKER(I)	100%	69.56	25	69.56	2		719.7003	2,156.08	3	53,115.70	-0.00004694	429	-0.02176	445	4,536.04
(K)ESYWEVKLDELYIGKER(I)	100%	61.57	25	56.96	2		719.7009	2,156.08	3	16,234.50	0.001786	429	0.828	445	6,592.14
(K)ESYWEVKLDELYIGKER(I)	100%	67.24	25	64.65	2		719.7	2,156.08	3	7894300	-0.0009619	429	-0.4459	445	4,305.59
(K)ESYWEVKLDELYIGKER(I)	100%	60.12	25	59.27	2		719.7011	2,156.08	3	51,101.90	0.002335	429	1.083	445	4,518.55
(K)ESYWEVKLDELYIGKER(I)	100%	25.89	25	25.89	2		719.7015	2,156.08	3	13,626.30	0.003433	429	1.592	445	6,112.57
(K)ESYWEVKLDELYIGKER(I)	100%	61.37	25	60.19	2		719.701	2,156.08	3	58,319.50	0.001969	429	0.9128	445	4,481.46
(K)ESYWEVKLDELYIGKER(I)	100%	29.26	25	27.41	2		719.7017	2,156.08	3	19,162.30	0.003982	429	1.846	445	5,420.87
(K)ESYWEVKLDELYIGKER(I)	100%	26.4	25	26.4	2		719.7017	2,156.08	3	13,296.70	0.003982	429	1.846	445	5,990.73
(K)ESYWEVKLDELYIGKER(I)	100%	64.45	25	64.45	2		719.6998	2,156.08	3	194517	-0.001511	429	-0.7005	445	4,374.71
(K)ESYWEVKLDELYIGKER(I)	100%	23.1	25	23.1	2		719.7018	2,156.08	3	12,071.20	0.004348	429	2.016	445	5,857.70
(K)ESYWEVKLDELYIGKER(I)	100%	75.68	25	73.48	2		719.7008	2,156.08	3	22,744.80	0.00142	429	0.6583	445	6,543.24
(K)ESYWEVKLDELYIGKER(I)	100%	82.16	25	70.92	2		719.7003	2,156.08	3	1.78E+07	-0.0002299	429	-0.1066	445	4,290.27
(K)ESYWEVKLDELYIGKER(I)	100%	45.14	25	38.14	2		719.7022	2,156.08	3	16,315.20	0.005629	429	2.61	445	5,765.88
(K)ESYWEVKLDELYIGKER(I)	100%	50.4	25	44.92	2		719.699	2,156.08	3	14,157.70	-0.004073	429	-1.888	445	6,841.00
(K)ESYWEVKLDELYIGKER(I)	100%	66.8	25	65.6	2		719.6994	2,156.08	3	17,223.70	-0.002792	429	-1.294	445	6,477.93
(K)ESYWEVKLDELYIGKER(I)	100%	78.98	25	78.98	2		719.7006	2,156.08	3	1148190	0.0008711	429	0.4038	445	4,322.61
(K)ESYWEVKLDELYIGKER(I)	100%	29.49	25	29.49	2		719.7022	2,156.08	3	58,889.30	0.005629	429	2.61	445	4,864.82
(K)ESYWEVKLDELYIGKER(I)	100%	35.47	25	35.47	2		719.7028	2,156.09	3	13,354.30	0.007279	429	3.374	445	6,879.81
(K)ESYWEVKLDELYIGKER(I)	100%	80.45	25	77.44	2		719.7001	2,156.08	3	55,682.30	-0.0005959	429	-0.2763	445	4,464.09
(K)ESYWEVKLDELYIGKER(I)	100%	73.79	25	72.61	2		719.7015	2,156.08	3	14,777.50	0.003433	429	1.592	445	6,717.71
(K)ESYWEVKLDELYIGKER(I)	100%	58.82	25	57.47	2		719.702	2,156.08	3	103994	0.004897	429	2.27	445	4,409.61
(K)ESYWEVKLDELYIGKER(I)	100%	78.91	25	69.39	2		719.6997	2,156.08	3	58,735.20	-0.001877	429	-0.8701	445	4,445.85
(K)ESYWEVKLDELYIGKER(I)	100%	49.48	25	49.48	2		719.7027	2,156.09	3	15,526.50	0.007096	429	3.29	445	6,277.59
(K)ESYWEVKLDELYIGKER(I)	100%	31.67	25	23.67	2		719.703	2,156.09	3	18,317.60	0.008011	429	3.714	445	6,408.90
(K)ESYWEVKLDELYIGKER(I)	100%	35.69	25	30.43	2		719.6982	2,156.07	3	9,316.05	-0.006272	429	-2.908	445	7,304.17
(K)ESYWEVKLDELYIGKER(I)	100%	28.86	25	26.04	2		719.6987	2,156.07	3	26,295.60	-0.004991	429	-2.314	445	7,288.84
(K)ESYWEVKLDELYIGKER(I)	100%	27.37	25	27.37	2		719.6987	2,156.07	3	18,426.10	-0.004991	429	-2.314	445	5,674.15
(K)ESYWEVKLDELYIGKER(I)	100%	25.45	25	25.45	2		719.7027	2,156.09	3	18,011.20	0.007096	429	3.29	445	6,317.39
(K)ESYWEVKLDELYIGKER(I)	100%	87.05	25	77.17	2		719.7	2,156.08	3	52,514.90	-0.0009619	429	-0.4459	445	4,499.66
(K)ESYWEVKLDELYIGKER(I)	100%	72.85	25	72.32	2		719.6993	2,156.08	3	400016	-0.003158	429	-1.464	445	4,337.83
(K)ESYWEVKLDELYIGKER(I)	100%	58.68	25	54.7	2		719.7029	2,156.09	3	15,731.20	0.007645	429	3.544	445	6,632.09
(K)ESYWEVKLDELYIGKER(I)	100%	58.76	25	58.76	2		719.7026	2,156.09	3	18,392.20	0.006913	429	3.205	445	6,780.54
(K)ESYWEVKLDELYIGKER(I)	100%	25.02	25	25.02	2		719.6979	2,156.07	3	13,823.70	-0.00737	429	-3.417	445	5,818.36
(K)ESYWEVKLDELYIGKER(I)	100%	25.4	25	25.4	2		719.6978	2,156.07	3	36,957.30	-0.007736	429	-3.586	445	5,142.17
(K)ESYWEVKLDELYIGKER(I)	100%	23.66	25	18.96	2		719.7025	2,156.09	3	12,214.40	0.006364	429	2.95	445	6,043.50
(K)ESYWEVKLDELYIGKER(I)	100%	21.49	25	21.49	2		719.7014	2,156.08	3	27,353.00	0.00325	429	1.507	445	6,297.23
(K)ESYWEVKLDELYIGKER(I)	100%	85.01	25	74.51	2		719.7019	2,156.08	3	208835	0.004714	429	2.185	445	4,274.62
(K)ESYWEVKLDELYIGKER(I)	100%	71.68	25	71.33	2		719.6981	2,156.07	3	232388	-0.006821	429	-3.162	445	4,358.94
(K)ESYWEVKLDELYIGKER(I)	100%	19.75	25	19.75	2		719.7005	2,156.08	3	13,680.40	0.0005021	429	0.2327	445	5,838.49
(K)ESYWEVKLDELYIGKER(I)	100%	77.28	25	66.53	2		719.7031	2,156.09	3	19,199.60	0.008194	429	3.799	445	6,391.74
(K)ESYWEVKLDELYIGKER(I)	100%	18.86	25	18.86	2		719.7005	2,156.08	3	20,926.30	0.0005021	429	0.2327	445	5,324.14
(K)ESYWEVKLDELYIGKER(I)	100%	79.78	25	77.85	2		719.6984	2,156.07	3	86,901.00	-0.005723	429	-2.653	445	4,428.32
(K)ESYWEVKLDELYIGKER(I)	100%	20.75	25	20.75	2		719.7026	2,156.09	3	45,709.60	0.00673	429	3.12	445	4,892.29
(K)ESYWEVKLDELYIGKER(I)	100%	18.73	25	18.73	2		719.6998	2,156.08	3	12,603.10	-0.001511	429	-0.7005	445	5,928.61
(K)ESYWEVKLDELYIGKER(I)	99%	21.89	25	9.86	2		719.7003	2,156.08	3	15,554.10	-0.0002299	429	-0.1066	445	5,721.92
(K)ESYWEVKLDELYIGKER(I)	99%	20.1	25	12.44	2		719.7008	2,156.08	3	20,137.70	0.00142	429	0.6583	445	5,441.70
(K)ESYWEVKLDELYIGKER(I)	93%	15.8	25	13.34	2		719.7028	2,156.09	3	48,834.20	0.007279	429	3.374	445	4,827.69
(E)SYWEVKLDELYIGKER(I)	100%	64.48	25	64.48	1		676.6857	2,027.04	3	63,043.80	-0.001208	430	-0.5956	445	4,284.29
(S)YWEVKLDELYIGK(E)	100%	46.93	25	46.93	1		552.6274	1,654.86	3	74,604.10	-0.0005579	431	-0.3369	443	4,848.32
(S)YWEVKLDELYIGKER(I)	100%	52.11	25	52.11	1		647.675	1,940.00	3	91,677.60	-0.001434	431	-0.7388	445	4,304.47
(S)YWEVKLDELYIGKER(I)	100%	69.56	25	69.56	1		647.6757	1,940.01	3	130549	0.0005791	431	0.2983	445	4,288.91
(Y)WEVKLDELYIGK(E)	100%	34.17	25	34.17	1		746.905	1,491.80	2	228112	-0.002064	432	-1.383	443	4,851.75
(Y)WEVKLDELYIGK(E)	99%	15.52	25	15.52	1		746.9055	1,491.80	2	249118	-0.001086	432	-0.7275	443	4,834.43
(Y)WEVKLDELYIGKER(I)	100%	63.19	25	61.54	1		593.3198	1,776.94	3	97,353.60	-0.003626	432	-2.039	445	4,283.87
(Y)WEVKLDELYIGKER(I)	100%	57.22	25	55.62	1		593.3169	1,776.93	3	136923	-0.01241	432	-6.982	445	4,301.98
(W)EVKLDELYIGK(E)	100%	38.74	25	38.74	1		653.8671	1,305.72	2	17,813.50	0.001308	433	1.001	443	3,100.09
(W)EVKLDELYIGK(E)	100%	44.86	25	44.86	1		653.8663	1,305.72	2	62,866.80	-0.0001559	433	-0.1193	443	4,834.95
(W)EVKLDELYIGK(E)	100%	31.49	25	31.49	1		653.8668	1,305.72	2	19,720.00	0.0008201	433	0.6276	443	4,872.39
(W)EVKLDELYIGK(E)	100%	34.68	25	34.68	1		653.8669	1,305.72	2	148548	0.001064	433	0.8143	443	4,510.68
(W)EVKLDELYIGK(E)	100%	25.48	25	25.48	1		436.2463	1,305.72	3	25,492.60	-0.001177	433	-0.9007	443	3,080.98
(W)EVKLDELYIGK(E)	100%	57.51	25	57.51	1		653.8653	1,305.72	2	89,201.30	-0.002232	433	-1.708	443	4,850.93
(W)EVKLDELYIGKER(I)	100%	55.83	25	50.89	1		531.2938	1,590.86	3	40,687.90	-0.002329	433	-1.463	445	4,302.68
(W)EVKLDELYIGKER(I)	100%	68.34	25	60.7	1		531.2923	1,590.86	3	60,678.60	-0.006907	433	-4.339	445	4,285.33
(E)VKLDELYIGK(E)	100%	38.68	25	38.68	1		589.3466	1,176.68	2	28,706.20	0.003016	434	2.561	443	4,856.78
(E)VKLDELYIGK(E)	100%	36.42	25	36.42	1		589.3438	1,176.67	2	30,254.60	-0.0026	434	-2.208	443	4,834.29
(V)KLDELYIGK(E)	100%	47.47	25	37.35	1		539.8113	1,077.61	2	20,795.80	0.0008581	435	0.7955	443	2,191.69
(V)KLDELYIGK(E)	100%	50.81	25	40.16	1		539.8121	1,077.61	2	122529	0.002446	435	2.268	443	4,843.20
(V)KLDELYIGK(E)	100%	48.97	25	39.42	1		539.8091	1,077.60	2	88,744.60	-0.003536	435	-3.278	443	4,511.85
(K)LDELYIGK(E)	99%	40.14	25	37.51	2		475.763	949.5115	2	15,416.50	-0.0007599	436	-0.7995	443	3,869.32
(K)LDELYIGK(E)	99%	40.15	25	37.12	2		475.7633	949.5121	2	203793	-0.0001499	436	-0.1577	443	2,708.36
(K)LDELYIGK(E)	99%	39.9	25	39.9	2		475.7631	949.5117	2	26,009.90	-0.0005759	436	-0.6059	443	3,256.49
(K)LDELYIGK(E)	99%	39.89	25	39.89	2		475.7632	949.5118	2	25,029.70	-0.0005159	436	-0.5428	443	3,378.94
(K)LDELYIGK(E)	99%	39.99	25	39.99	2		475.7629	949.5113	2	21,434.70	-0.0009439	436	-0.9931	443	3,635.36
(K)LDELYIGK(E)	99%	40.39	25	40.39	2		475.7628	949.5111	2	138477	-0.001188	436	-1.25	443	2,796.51
(K)LDELYIGK(E)	99%	40.5	25	40.5	2		475.7629	949.5113	2	27,622.00	-0.001004	436	-1.056	443	3,168.97
(K)LDELYIGK(E)	99%	40.55	25	40.55	2		475.7634	949.5122	2	31,566.00	-0.00002794	436	-0.0294	443	3,151.12
(K)LDELYIGK(E)	99%	40.57	25	40.57	2		475.7631	949.5116	2	67,499.60	-0.0006379	436	-0.6712	443	2,893.70
(K)LDELYIGK(E)	99%	39.21	25	39.21	2		475.7635	949.5125	2	22,948.70	0.0002161	436	0.2273	443	3,361.10
(K)LDELYIGK(E)	99%	40.65	25	40.65	2		475.7633	949.5121	2	48,907.20	-0.0001499	436	-0.1577	443	2,963.00
(K)LDELYIGK(E)	99%	39.18	25	39.18	2		475.7633	949.512	2	21,635.80	-0.0002719	436	-0.2861	443	3,653.72
(K)LDELYIGK(E)	99%	39.11	25	39.11	2		475.7632	949.5119	2	25,944.70	-0.0003319	436	-0.3492	443	3,221.75
(K)LDELYIGK(E)	99%	40.73	25	40.73	2		475.7635	949.5124	2	26,848.40	0.00009406	436	0.09895	443	3,239.38
(K)LDELYIGK(E)	99%	39.09	25	39.09	2		475.7633	949.5121	2	29,899.10	-0.0001499	436	-0.1577	443	3,290.95
(K)LDELYIGK(E)	99%	39.02	25	39.02	2		475.7626	949.5107	2	21,110.70	-0.001614	436	-1.698	443	3,584.30
(K)LDELYIGK(E)	99%	39	25	39	2		475.7624	949.5102	2	25,627.80	-0.002042	436	-2.148	443	3,308.65
(K)LDELYIGK(E)	99%	40.87	25	40.87	2		475.763	949.5115	2	120948	-0.0007599	436	-0.7995	443	2,781.25
(K)LDELYIGK(E)	99%	38.96	25	38.96	2		475.7633	949.512	2	95,003.90	-0.0002719	436	-0.2861	443	2,842.80
(K)LDELYIGK(E)	99%	40.91	25	40.91	2		475.7631	949.5117	2	81,892.90	-0.0005759	436	-0.6059	443	2,858.99
(K)LDELYIGK(E)	99%	38.92	25	38.92	2		475.763	949.5114	2	134608	-0.0008819	436	-0.9279	443	2,766.08
(K)LDELYIGK(E)	99%	40.93	25	40.93	2		475.763	949.5114	2	22,836.00	-0.0008219	436	-0.8647	443	3,343.46
(K)LDELYIGK(E)	99%	38.91	25	38.91	2		475.763	949.5115	2	78,858.40	-0.0007599	436	-0.7995	443	2,749.63
(K)LDELYIGK(E)	99%	38.86	25	38.86	2		475.7629	949.5113	2	3.86E+07	-0.0009439	436	-0.9931	443	2,606.96
(K)LDELYIGK(E)	99%	38.57	25	38.57	2		475.7635	949.5124	2	27,155.90	0.00009406	436	0.09895	443	3,186.54
(K)LDELYIGK(E)	99%	41.5	25	41.5	2		475.7638	949.513	2	36,099.90	0.0007041	436	0.7407	443	3,050.23
(K)LDELYIGK(E)	99%	38.31	25	38.31	2		475.7633	949.512	2	53,473.40	-0.0002719	436	-0.2861	443	2,944.93
(K)LDELYIGK(E)	99%	41.71	25	41.71	2		475.7628	949.5111	2	6207800	-0.001126	436	-1.185	443	2,622.12
(K)LDELYIGK(E)	99%	42.96	25	39.73	2		475.7628	949.5111	2	27,346.70	-0.001188	436	-1.25	443	3,067.43
(K)LDELYIGK(E)	99%	42	25	42	2		475.7633	949.5121	2	56,357.30	-0.0001499	436	-0.1577	443	2,927.70
(K)LDELYIGK(E)	99%	42	25	42	2		475.7636	949.5125	2	46,220.70	0.0002781	436	0.2925	443	3,016.09
(K)LDELYIGK(E)	99%	42.16	25	42.16	2		475.7634	949.5122	2	204469	-0.00008794	436	-0.09252	443	2,726.80
(K)LDELYIGK(E)	99%	37.68	25	37.68	2		475.7628	949.5111	2	14,506.50	-0.001188	436	-1.25	443	4,448.97
(K)LDELYIGK(E)	99%	42.49	25	41.85	2		475.7632	949.5118	2	31,887.00	-0.0004539	436	-0.4776	443	3,102.58
(K)LDELYIGK(E)	99%	37.59	25	37.59	2		475.7624	949.5103	2	63,383.00	-0.00198	436	-2.083	443	2,591.79
(K)LDELYIGK(E)	99%	42.65	25	42.65	2		475.7633	949.5121	2	673863	-0.0002099	436	-0.2209	443	2,654.59
(K)LDELYIGK(E)	99%	37.28	25	36.57	2		475.7629	949.5113	2	15,884.50	-0.001004	436	-1.056	443	3,985.61
(K)LDELYIGK(E)	99%	42.87	25	42.87	2		475.7634	949.5122	2	30,943.00	-0.00002794	436	-0.0294	443	3,085.30
(K)LDELYIGK(E)	99%	43.02	25	43.02	2		475.7637	949.5129	2	77,657.30	0.0005821	436	0.6124	443	2,875.72
(K)LDELYIGK(E)	99%	43.17	25	43.17	2		475.7631	949.5116	2	97,174.20	-0.0006379	436	-0.6712	443	2,827.27
(K)LDELYIGK(E)	99%	43.2	25	43.2	2		475.7633	949.5121	2	263063	-0.0001499	436	-0.1577	443	2,689.91
(K)LDELYIGK(E)	99%	43.45	25	43.45	2		475.7634	949.5123	2	28,590.80	0.00003406	436	0.03583	443	3,203.88
(K)LDELYIGK(E)	99%	36.37	25	34.62	2		475.7636	949.5126	2	12,412.90	0.0003381	436	0.3557	443	3,952.40
(K)LDELYIGK(E)	99%	43.92	25	43.92	2		475.7635	949.5124	2	18,895.90	0.00009406	436	0.09895	443	3,396.49
(K)LDELYIGK(E)	99%	44.05	25	44.05	2		475.7633	949.5121	2	27,678.30	-0.0001499	436	-0.1577	443	3,133.89
(K)LDELYIGK(E)	99%	44.25	25	44.25	2		475.7631	949.5116	2	404199	-0.0006379	436	-0.6712	443	2,672.56
(K)LDELYIGK(E)	99%	44.25	25	44.25	2		475.7635	949.5125	2	1214240	0.0002161	436	0.2273	443	2,637.81
(K)LDELYIGK(E)	99%	44.51	25	44.51	2		475.763	949.5114	2	116276	-0.0008819	436	-0.9279	443	2,811.87
(K)LDELYIGK(E)	99%	44.75	25	44.75	2		475.7634	949.5122	2	53,132.00	-0.00008794	436	-0.09252	443	2,998.53
(K)LDELYIGK(E)	99%	45.05	25	45.05	2		475.7631	949.5116	2	38,541.00	-0.0006379	436	-0.6712	443	3,032.48
(K)LDELYIGK(E)	99%	34.64	25	34.64	2		475.7632	949.5119	2	19,874.00	-0.0003939	436	-0.4144	443	3,413.87
(K)LDELYIGK(E)	99%	45.36	25	45.36	2		475.7631	949.5116	2	18,214.20	-0.0006379	436	-0.6712	443	3,707.71
(K)LDELYIGK(E)	99%	34.4	25	34.4	2		475.763	949.5115	2	17,043.10	-0.0007599	436	-0.7995	443	3,850.05
(K)LDELYIGK(E)	99%	34.39	25	34.39	2		475.7632	949.5118	2	16,241.20	-0.0004539	436	-0.4776	443	3,830.68
(K)LDELYIGK(E)	99%	45.58	25	45.58	2		475.7632	949.5119	2	59,112.90	-0.0003939	436	-0.4144	443	2,910.06
(K)LDELYIGK(E)	99%	34.09	25	34.09	2		475.763	949.5115	2	23,069.10	-0.0007599	436	-0.7995	443	3,326.62
(K)LDELYIGK(E)	99%	34.81	25	31.72	2		475.7619	949.5093	2	11,115.60	-0.003018	436	-3.175	443	5,291.32
(K)LDELYIGK(E)	99%	33.87	25	33.87	2		475.7628	949.511	2	12,266.00	-0.001248	436	-1.313	443	5,703.29
(K)LDELYIGK(E)	99%	33.79	25	33.79	2		475.7631	949.5116	2	13,478.20	-0.0006379	436	-0.6712	443	3,889.00
(K)LDELYIGK(E)	99%	46.54	25	46.54	2		475.7635	949.5124	2	16,654.00	0.0001561	436	0.1642	443	4,040.49
(K)LDELYIGK(E)	99%	33.18	25	33.18	2		475.7631	949.5116	2	19,656.30	-0.0006979	436	-0.7343	443	3,689.80
(K)LDELYIGK(E)	99%	32.92	25	32.92	2		475.763	949.5114	2	20,979.40	-0.0008219	436	-0.8647	443	3,568.72
(K)LDELYIGK(E)	99%	46.93	25	46.93	2		475.7632	949.5119	2	28,226.80	-0.0003319	436	-0.3492	443	3,118.10
(K)LDELYIGK(E)	99%	47.59	25	45.96	2		475.7641	949.5136	2	17,533.90	0.001376	436	1.448	443	3,432.23
(K)LDELYIGK(E)	99%	48.13	25	44.9	2		475.7639	949.5133	2	50,670.50	0.00101	436	1.063	443	2,980.12
(K)LDELYIGK(E)	99%	32.73	25	32.6	2		475.7632	949.5119	2	32,651.20	-0.0003939	436	-0.4144	443	3,535.98
(K)LDELYIGK(E)	99%	48.24	25	45.06	2		475.7629	949.5113	2	33,739.40	-0.001004	436	-1.056	443	3,672.24
(K)LDELYIGK(E)	99%	31.97	25	31.97	2		475.7628	949.511	2	15,030.60	-0.001248	436	-1.313	443	4,178.12
(K)LDELYIGK(E)	99%	31.61	25	31.61	2		475.7632	949.5119	2	15,064.50	-0.0003939	436	-0.4144	443	4,493.20
(K)LDELYIGK(E)	99%	31.59	25	31.59	2		475.7648	949.5151	2	16,560.00	0.00278	436	2.925	443	4,521.41
(K)LDELYIGK(E)	99%	30.97	25	30.97	2		475.7633	949.5121	2	84,541.30	-0.0001499	436	-0.1577	443	3,274.21
(K)LDELYIGK(E)	99%	30.14	25	30.14	2		475.7636	949.5125	2	12,218.10	0.0002781	436	0.2925	443	4,876.07
(K)LDELYIGK(E)	99%	29.44	25	29.44	2		475.7636	949.5127	2	15,027.70	0.0004601	436	0.484	443	4,220.04
(K)LDELYIGK(E)	99%	29.32	25	29.32	2		475.7631	949.5117	2	21,008.20	-0.0005759	436	-0.6059	443	3,552.48
(K)LDELYIGK(E)	99%	28.99	25	28.99	2		475.7636	949.5126	2	12,153.80	0.0003381	436	0.3557	443	5,337.18
(K)LDELYIGK(E)	99%	28.92	25	28.92	2		475.7634	949.5122	2	22,026.30	-0.00002794	436	-0.0294	443	3,617.29
(K)LDELYIGK(E)	99%	29.27	25	27.62	2		475.7638	949.5131	2	19,250.70	0.0008261	436	0.8691	443	3,761.33
(K)LDELYIGK(E)	99%	28.64	25	28.64	2		475.7628	949.5111	2	12,575.90	-0.001188	436	-1.25	443	4,239.84
(K)LDELYIGK(E)	99%	27.59	25	27.59	2		475.7644	949.5143	2	15,619.40	0.001986	436	2.089	443	4,160.67
(K)LDELYIGK(E)	99%	26.87	25	26.87	2		475.7632	949.5119	2	13,903.40	-0.0003939	436	-0.4144	443	4,958.08
(K)LDELYIGK(E)	99%	26.57	25	26.57	2		475.7635	949.5124	2	20,235.60	0.0001561	436	0.1642	443	3,794.06
(K)LDELYIGK(E)	99%	26.51	25	26.51	2		475.7633	949.5121	2	22,066.90	-0.0002099	436	-0.2209	443	4,002.91
(K)LDELYIGK(E)	99%	26.38	25	26.38	2		475.7633	949.5121	2	21,616.80	-0.0002099	436	-0.2209	443	3,743.47
(K)LDELYIGK(E)	99%	25.38	25	25.38	2		475.763	949.5115	2	17,343.60	-0.0007599	436	-0.7995	443	4,308.11
(K)LDELYIGK(E)	99%	25.35	25	25.35	2		475.7639	949.5133	2	14,382.90	0.001072	436	1.128	443	4,260.28
(K)LDELYIGK(E)	99%	25.23	25	25.23	2		475.7632	949.5119	2	14,848.00	-0.0003319	436	-0.3492	443	3,908.35
(K)LDELYIGK(E)	99%	24.75	25	24.75	2		475.7637	949.5129	2	9,069.47	0.0005821	436	0.6124	443	5,761.04
(K)LDELYIGK(E)	99%	24.67	25	24.09	2		475.7632	949.5119	2	14,006.00	-0.0003939	436	-0.4144	443	4,398.46
(K)LDELYIGK(E)	99%	24.44	25	24.44	2		475.7634	949.5123	2	9,958.62	0.00003406	436	0.03583	443	5,016.62
(K)LDELYIGK(E)	99%	24.42	25	24.42	2		475.7628	949.511	2	9,407.12	-0.001248	436	-1.313	443	5,990.51
(K)LDELYIGK(E)	99%	24.17	25	24.17	2		475.7636	949.5126	2	24,231.90	0.0003381	436	0.3557	443	3,601.46
(K)LDELYIGK(E)	99%	24.05	25	24.05	2		475.7628	949.5111	2	11,474.70	-0.001126	436	-1.185	443	4,894.54
(K)LDELYIGK(E)	99%	23.84	25	23.84	2		475.7636	949.5125	2	19,246.30	0.0002781	436	0.2925	443	3,776.69
(K)LDELYIGK(E)	99%	23.57	25	23.57	2		475.7633	949.512	2	17,822.40	-0.0002719	436	-0.2861	443	4,139.88
(K)LDELYIGK(E)	99%	23.3	25	23.3	2		475.7636	949.5125	2	17,345.90	0.0002781	436	0.2925	443	4,021.44
(K)LDELYIGK(E)	99%	22.9	25	22.9	2		475.7642	949.5139	2	13,230.40	0.00162	436	1.704	443	4,914.03
(K)LDELYIGK(E)	99%	22.51	25	21.79	2		475.7639	949.5132	2	20,998.70	0.0009481	436	0.9974	443	3,812.41
(K)LDELYIGK(E)	99%	22.06	25	22.06	2		475.7635	949.5125	2	6,840.90	0.0002161	436	0.2273	443	6,178.36
(K)LDELYIGK(E)	99%	21.94	25	21.94	2		475.7649	949.5152	2	18,745.50	0.002964	436	3.118	443	4,542.07
(K)LDELYIGK(E)	99%	21.85	25	21.85	2		475.7636	949.5127	2	13,552.10	0.0004601	436	0.484	443	4,196.76
(K)LDELYIGK(E)	99%	21.63	25	21.63	2		475.7639	949.5132	2	13,667.60	0.0008881	436	0.9343	443	5,246.88
(K)LDELYIGK(E)	99%	21.46	25	21.12	2		475.7632	949.5119	2	16,289.40	-0.0003319	436	-0.3492	443	4,279.89
(K)LDELYIGK(E)	99%	21.12	25	21	2		475.7637	949.5129	2	9,002.31	0.0006441	436	0.6776	443	5,842.89
(K)LDELYIGK(E)	99%	21.07	25	21.07	2		475.7613	949.508	2	13,032.20	-0.0043	436	-4.524	443	5,783.39
(K)LDELYIGK(E)	99%	20.86	25	20.86	2		475.7628	949.5111	2	9,646.58	-0.001126	436	-1.185	443	5,654.04
(K)LDELYIGK(E)	99%	20.56	25	20.56	2		475.7635	949.5124	2	11,398.90	0.0001561	436	0.1642	443	5,321.00
(K)LDELYIGK(E)	99%	20.38	25	20.33	2		475.7634	949.5122	2	14,982.90	-0.00002794	436	-0.0294	443	4,469.40
(K)LDELYIGK(E)	99%	19.33	25	19.33	2		475.7628	949.511	2	20,223.70	-0.00131	436	-1.378	443	3,727.13
(K)LDELYIGK(E)	99%	19.3	25	19.3	2		475.7634	949.5122	2	10,797.30	-0.00002794	436	-0.0294	443	6,068.03
(K)LDELYIGK(E)	99%	18.35	25	18.35	2		475.7632	949.5118	2	10,225.70	-0.0004539	436	-0.4776	443	5,389.27
(K)LDELYIGK(E)	99%	17.95	25	17.95	2		475.7632	949.5119	2	10,040.70	-0.0003319	436	-0.3492	443	5,973.68
(K)LDELYIGK(E)	99%	17.95	25	17.95	2		475.7639	949.5132	2	9,306.58	0.0009481	436	0.9974	443	5,956.89
(K)LDELYIGK(E)	99%	17.5	25	17.5	2		475.7639	949.5132	2	7,899.55	0.0009481	436	0.9974	443	5,623.94
(K)LDELYIGK(E)	99%	17.13	25	17.13	2		475.7637	949.5129	2	10,353.20	0.0005821	436	0.6124	443	5,874.22
(K)LDELYIGK(E)	99%	16.79	25	16.79	2		475.7638	949.513	2	13,206.60	0.0007661	436	0.8059	443	5,482.73
(K)LDELYIGK(E)	99%	16.46	25	16.46	2		475.7638	949.513	2	9,002.40	0.0007661	436	0.8059	443	6,295.24
(K)LDELYIGK(E)	98%	14.11	25	14.11	2		475.7633	949.512	2	13,735.50	-0.0002719	436	-0.2861	443	7,294.87
(K)LDELYIGK(E)	97%	16.87	25	16.87	2		475.7646	949.5147	2	15,131.20	0.002474	436	2.603	443	4,995.42
(K)LDELYIGK(E)	97%	14.92	25	14.92	2		475.7629	949.5113	2	11,353.20	-0.001004	436	-1.056	443	5,456.99
(K)LDELYIGK(E)	96%	12.64	25	12.64	2		475.7633	949.5121	2	75,761.00	-0.0001499	436	-0.1577	443	3,489.74
(K)LDELYIGK(E)	93%	10.55	25	10.55	2		475.7634	949.5122	2	11,801.60	-0.00008794	436	-0.09252	443	6,043.17
(K)LDELYIGK(E)	92%	11.02	25	11.02	2		475.7636	949.5127	2	10,997.60	0.0004001	436	0.4209	443	5,432.13
(K)LDELYIGK(E)	91%	10.51	25	10.51	2		475.7632	949.5119	2	12,095.30	-0.0003319	436	-0.3492	443	5,806.79
(K)LDELYIGKER(I)	100%	39.47	25	39.47	2		618.3359	1,234.66	2	6,265.38	0.001354	436	1.096	445	7,314.25
(K)LDELYIGKER(I)	100%	41.37	25	40.32	2		618.3356	1,234.66	2	4,280.88	0.0007421	436	0.6005	445	7,499.82
(K)LDELYIGKER(I)	100%	32.95	25	32.95	2		412.5593	1,234.66	3	67,606.20	0.00009006	436	0.07288	445	2,448.15
(K)LDELYIGKER(I)	100%	50.45	25	50.45	2		618.3353	1,234.66	2	27,459.80	0.0001321	436	0.1069	445	2,710.65
(K)LDELYIGKER(I)	100%	31.26	25	31.26	2		412.5592	1,234.66	3	19,867.70	-0.00009294	436	-0.07522	445	3,324.89
(K)LDELYIGKER(I)	100%	42.74	25	42.74	2		618.3354	1,234.66	2	29,687.80	0.0003761	436	0.3043	445	2,946.85
(K)LDELYIGKER(I)	100%	50.1	25	48.99	2		618.3352	1,234.66	2	37,503.60	-0.0001119	436	-0.09059	445	2,912.17
(K)LDELYIGKER(I)	100%	32.04	25	29.4	2		412.5593	1,234.66	3	90,478.50	-0.000002942	436	-0.002381	445	2,395.95
(K)LDELYIGKER(I)	100%	28.33	25	28.33	2		412.5593	1,234.66	3	78,166.30	0.0001801	436	0.1457	445	2,413.77
(K)LDELYIGKER(I)	100%	36.15	25	36.09	2		618.335	1,234.66	2	29,183.30	-0.0004779	436	-0.3868	445	2,929.86
(K)LDELYIGKER(I)	100%	48.39	25	46.42	2		618.3351	1,234.66	2	43,239.30	-0.0002339	436	-0.1893	445	2,811.67
(K)LDELYIGKER(I)	100%	27.41	25	27.41	2		412.5593	1,234.66	3	37,773.80	0.0001801	436	0.1457	445	2,691.83
(K)LDELYIGKER(I)	100%	34.74	25	34.74	2		618.3351	1,234.66	2	56,125.80	-0.0003559	436	-0.2881	445	2,623.19
(K)LDELYIGKER(I)	100%	33.7	25	33.7	2		412.5591	1,234.66	3	134902	-0.0003689	436	-0.2986	445	2,295.54
(K)LDELYIGKER(I)	100%	33.16	25	33.16	2		412.5591	1,234.66	3	100341	-0.0004589	436	-0.3714	445	2,363.06
(K)LDELYIGKER(I)	100%	23.4	25	23.4	2		412.5593	1,234.66	3	110529	0.00009006	436	0.07288	445	2,313.30
(K)LDELYIGKER(I)	100%	32.31	25	32.31	2		412.5591	1,234.66	3	54,138.90	-0.0006419	436	-0.5195	445	2,501.73
(K)LDELYIGKER(I)	100%	29.41	25	29.41	2		412.5594	1,234.66	3	16,045.90	0.0004561	436	0.3691	445	4,215.12
(K)LDELYIGKER(I)	100%	28.72	25	28.72	2		412.5592	1,234.66	3	42,260.40	-0.0001859	436	-0.1505	445	2,552.02
(K)LDELYIGKER(I)	100%	29.97	25	29.97	2		412.5591	1,234.66	3	56,344.80	-0.0004589	436	-0.3714	445	2,484.16
(K)LDELYIGKER(I)	100%	27.88	25	27.88	2		412.5592	1,234.66	3	160930	-0.0001859	436	-0.1505	445	2,278.11
(K)LDELYIGKER(I)	100%	31.87	25	31.76	2		412.5592	1,234.66	3	2170680	-0.0002759	436	-0.2233	445	2,175.51
(K)LDELYIGKER(I)	100%	28.55	25	26.08	2		412.5592	1,234.66	3	74,703.10	-0.0001859	436	-0.1505	445	2,431.56
(K)LDELYIGKER(I)	100%	50.26	25	50.26	2		618.335	1,234.66	2	22,553.60	-0.0004779	436	-0.3868	445	2,964.96
(K)LDELYIGKER(I)	100%	28.32	25	28.32	2		412.5595	1,234.66	3	15,422.20	0.0006391	436	0.5172	445	7,298.46
(K)LDELYIGKER(I)	100%	28.64	25	28.64	2		412.5591	1,234.66	3	180586	-0.0004589	436	-0.3714	445	2,260.75
(K)LDELYIGKER(I)	100%	26.9	25	26.9	2		412.5595	1,234.66	3	42,837.60	0.0007291	436	0.59	445	6,584.79
(K)LDELYIGKER(I)	100%	22.41	25	22.41	2		412.5594	1,234.66	3	34,421.40	0.0002731	436	0.221	445	6,982.69
(K)LDELYIGKER(I)	100%	30.46	25	30.3	2		412.559	1,234.66	3	200624	-0.0007349	436	-0.5948	445	2,227.73
(K)LDELYIGKER(I)	100%	27	25	27	2		412.5591	1,234.66	3	30,756.30	-0.0005519	436	-0.4467	445	2,843.56
(K)LDELYIGKER(I)	100%	30.57	25	30.57	2		412.5596	1,234.66	3	30,419.10	0.001005	436	0.8134	445	6,299.05
(K)LDELYIGKER(I)	100%	25.62	25	25.62	2		412.5591	1,234.66	3	512450	-0.0003689	436	-0.2986	445	2,192.12
(K)LDELYIGKER(I)	100%	31.07	25	31.07	2		412.5597	1,234.66	3	41,526.20	0.001278	436	1.034	445	6,690.25
(K)LDELYIGKER(I)	100%	23.73	25	23.73	2		412.5595	1,234.66	3	19,639.30	0.0008221	436	0.6653	445	3,616.65
(K)LDELYIGKER(I)	100%	51.17	25	51.17	2		618.3359	1,234.66	2	225778	0.00123	436	0.9955	445	2,242.75
(K)LDELYIGKER(I)	100%	22.58	25	22.58	2		412.5594	1,234.66	3	42,102.90	0.0004561	436	0.3691	445	2,656.49
(K)LDELYIGKER(I)	100%	33.69	25	33.69	2		412.5589	1,234.65	3	100542	-0.001101	436	-0.891	445	2,347.10
(K)LDELYIGKER(I)	100%	26.94	25	26.94	2		412.559	1,234.66	3	6,339.92	-0.0007349	436	-0.5948	445	7,329.93
(K)LDELYIGKER(I)	100%	23.47	25	23.47	2		412.5591	1,234.66	3	16,144.10	-0.0006419	436	-0.5195	445	4,835.98
(K)LDELYIGKER(I)	100%	22.21	25	22.21	2		412.5595	1,234.66	3	30,732.60	0.0006391	436	0.5172	445	5,470.77
(K)LDELYIGKER(I)	100%	23.44	25	23.44	2		412.5591	1,234.66	3	279880	-0.0006419	436	-0.5195	445	2,209.92
(K)LDELYIGKER(I)	100%	22.69	25	22.69	2		412.5591	1,234.66	3	67,137.40	-0.0003689	436	-0.2986	445	2,465.92
(K)LDELYIGKER(I)	100%	23.96	25	23.96	2		412.5592	1,234.66	3	13,051.90	-0.0002759	436	-0.2233	445	6,258.17
(K)LDELYIGKER(I)	100%	61.76	25	57.32	2		618.3351	1,234.66	2	17,445.70	-0.0002339	436	-0.1893	445	3,248.80
(K)LDELYIGKER(I)	100%	59.23	25	58.77	2		618.335	1,234.66	2	54,631.00	-0.0004779	436	-0.3868	445	2,534.66
(K)LDELYIGKER(I)	100%	55.17	25	55.17	2		618.3358	1,234.66	2	44,510.40	0.001108	436	0.8967	445	6,787.71
(K)LDELYIGKER(I)	100%	54.46	25	51.57	2		618.3347	1,234.65	2	37,075.70	-0.001088	436	-0.8805	445	6,634.76
(K)LDELYIGKER(I)	100%	32.69	25	32.69	2		412.5588	1,234.65	3	92,742.90	-0.001467	436	-1.187	445	2,379.18
(K)LDELYIGKER(I)	100%	23.53	25	23.53	2		412.5589	1,234.65	3	36,805.00	-0.001101	436	-0.891	445	6,873.36
(K)LDELYIGKER(I)	100%	68.09	25	62.9	2		618.3359	1,234.66	2	34,089.60	0.00123	436	0.9955	445	6,916.56
(K)LDELYIGKER(I)	100%	55.19	25	53.11	2		618.3345	1,234.65	2	49,491.60	-0.001454	436	-1.177	445	2,517.35
(K)LDELYIGKER(I)	100%	46.78	25	46.78	2		618.3344	1,234.65	2	22,521.50	-0.00182	436	-1.473	445	2,983.12
(K)LDELYIGKER(I)	100%	55.28	25	55.28	2		618.3345	1,234.65	2	3.08E+07	-0.001454	436	-1.177	445	2,160.34
(K)LDELYIGKER(I)	100%	50.03	25	48.01	2		618.3344	1,234.65	2	30,035.00	-0.00182	436	-1.473	445	6,954.24
(K)LDELYIGKER(I)	100%	25.15	25	25.15	2		412.5587	1,234.65	3	41,505.10	-0.00165	436	-1.335	445	2,894.38
(K)LDELYIGKER(I)	100%	33.03	25	33.03	2		412.5605	1,234.66	3	31,629.80	0.003843	436	3.11	445	6,829.02
(K)LDELYIGKER(I)	100%	28.19	25	28.19	2		412.5585	1,234.65	3	44,967.90	-0.002292	436	-1.855	445	2,639.90
(K)LDELYIGKER(I)	100%	25.07	25	18.4	2		412.5589	1,234.65	3	17,884.70	-0.001194	436	-0.9662	445	3,786.28
(K)LDELYIGKER(I)	100%	21.93	25	21.93	2		412.5593	1,234.66	3	42,201.00	0.00009006	436	0.07288	445	2,569.24
(K)LDELYIGKER(I)	100%	35.6	25	28.88	2		618.3373	1,234.66	2	44,738.20	0.00416	436	3.367	445	7,282.81
(K)LDELYIGKER(I)	100%	21.65	25	21.65	2		412.5593	1,234.66	3	20,778.10	-0.000002942	436	-0.002381	445	3,123.91
(K)LDELYIGKER(I)	100%	47.31	25	47.31	2		618.3379	1,234.66	2	70,487.00	0.00526	436	4.257	445	4,286.20
(K)LDELYIGKER(I)	100%	20.74	25	20.74	2		412.5595	1,234.66	3	47,416.80	0.0007291	436	0.59	445	3,050.37
(K)LDELYIGKER(I)	100%	22.07	25	22.07	2		412.5591	1,234.66	3	22,946.30	-0.0004589	436	-0.3714	445	3,286.40
(K)LDELYIGKER(I)	100%	21.22	25	21.22	2		412.5595	1,234.66	3	20,665.90	0.0006391	436	0.5172	445	3,266.77
(K)LDELYIGKER(I)	100%	21.16	25	21.16	2		412.5591	1,234.66	3	34,325.60	-0.0004589	436	-0.3714	445	5,256.46
(K)LDELYIGKER(I)	100%	21.17	25	21.17	2		412.5591	1,234.66	3	19,387.90	-0.0006419	436	-0.5195	445	3,343.82
(K)LDELYIGKER(I)	100%	20.81	25	20.81	2		412.5592	1,234.66	3	21,332.00	-0.0002759	436	-0.2233	445	3,383.12
(K)LDELYIGKER(I)	100%	22.78	25	22.78	2		412.5582	1,234.65	3	16,656.10	-0.003114	436	-2.52	445	3,685.72
(K)LDELYIGKER(I)	100%	21.27	25	21.27	2		412.5596	1,234.66	3	27,294.70	0.001095	436	0.8862	445	3,020.49
(K)LDELYIGKER(I)	100%	23.71	25	23.71	2		412.5608	1,234.66	3	32,507.60	0.004668	436	3.778	445	3,160.36
(K)LDELYIGKER(I)	100%	21.71	25	21.71	2		412.559	1,234.66	3	36,323.60	-0.0008279	436	-0.67	445	3,817.89
(K)LDELYIGKER(I)	100%	21.66	25	21.66	2		412.5598	1,234.66	3	36,603.20	0.001644	436	1.331	445	6,739.32
(K)LDELYIGKER(I)	100%	21.58	25	21.58	2		412.5588	1,234.65	3	111301	-0.001467	436	-1.187	445	2,329.75
(K)LDELYIGKER(I)	100%	21.71	25	16.06	2		412.5595	1,234.66	3	16,937.90	0.0007291	436	0.59	445	3,433.61
(K)LDELYIGKER(I)	100%	20.03	25	20.03	2		412.5591	1,234.66	3	20,353.30	-0.0004589	436	-0.3714	445	3,307.09
(K)LDELYIGKER(I)	100%	18.91	25	18.91	2		412.5591	1,234.66	3	16,238.60	-0.0004589	436	-0.3714	445	3,856.13
(K)LDELYIGKER(I)	100%	19.47	25	19.47	2		412.5592	1,234.66	3	21,544.40	-0.0002759	436	-0.2233	445	3,667.02
(K)LDELYIGKER(I)	100%	19.21	25	19.21	2		412.5592	1,234.66	3	29,485.00	-0.0002759	436	-0.2233	445	2,859.33
(K)LDELYIGKER(I)	100%	21.84	25	21.84	2		412.5584	1,234.65	3	31,623.70	-0.002748	436	-2.224	445	2,827.47
(K)LDELYIGKER(I)	100%	19.14	25	19.14	2		412.559	1,234.66	3	26,268.20	-0.0007349	436	-0.5948	445	4,022.44
(K)LDELYIGKER(I)	100%	20.71	25	15.57	2		412.5596	1,234.66	3	27,208.30	0.001005	436	0.8134	445	6,106.19
(K)LDELYIGKER(I)	100%	18.05	25	18.05	2		412.5595	1,234.66	3	19,686.90	0.0006391	436	0.5172	445	3,361.32
(K)LDELYIGKER(I)	99%	19.59	25	19.59	2		412.56	1,234.66	3	39,667.30	0.002286	436	1.85	445	6,531.64
(K)LDELYIGKER(I)	99%	17.41	25	16.58	2		412.5595	1,234.66	3	19,208.50	0.0008221	436	0.6653	445	6,276.22
(K)LDELYIGKER(I)	99%	18.32	25	18.32	2		412.559	1,234.66	3	30,524.80	-0.0009179	436	-0.7429	445	3,000.72
(K)LDELYIGKER(I)	99%	17.44	25	17.44	2		412.5591	1,234.66	3	23,151.20	-0.0004589	436	-0.3714	445	3,141.74
(K)LDELYIGKER(I)	99%	17.41	25	17.41	2		412.5594	1,234.66	3	35,833.40	0.0005461	436	0.4419	445	2,729.26
(K)LDELYIGKER(I)	99%	21.13	25	11.49	2		412.5592	1,234.66	3	5,682.85	-0.0001859	436	-0.1505	445	7,346.38
(K)LDELYIGKER(I)	99%	16.5	25	16.5	2		412.5594	1,234.66	3	20,830.40	0.0003631	436	0.2938	445	3,763.44
(K)LDELYIGKER(I)	99%	16.93	25	16.93	2		412.5591	1,234.66	3	27,272.30	-0.0003689	436	-0.2986	445	3,178.48
(K)LDELYIGKER(I)	99%	16.31	25	16.31	2		412.5591	1,234.66	3	29,199.30	-0.0005519	436	-0.4467	445	3,195.91
(K)LDELYIGKER(I)	99%	17.39	25	17.39	2		412.5597	1,234.66	3	32,745.00	0.001371	436	1.11	445	2,876.41
(K)LDELYIGKER(I)	99%	17.28	25	17.28	2		412.559	1,234.66	3	14,503.40	-0.0008279	436	-0.67	445	4,249.59
(K)LDELYIGKER(I)	99%	16.81	25	16.81	2		412.559	1,234.66	3	43,539.10	-0.0008279	436	-0.67	445	2,674.60
(K)LDELYIGKER(I)	99%	18.8	25	18.8	2		412.5584	1,234.65	3	20,495.10	-0.002565	436	-2.076	445	3,717.07
(K)LDELYIGKER(I)	99%	15.53	25	14.81	2		412.5591	1,234.66	3	42,324.10	-0.0003689	436	-0.2986	445	6,468.73
(K)LDELYIGKER(I)	99%	17.59	25	11.67	2		412.5597	1,234.66	3	11,974.00	0.001371	436	1.11	445	4,882.37
(K)LDELYIGKER(I)	99%	16.09	25	16.09	2		412.5588	1,234.65	3	13,735.80	-0.001467	436	-1.187	445	4,192.94
(K)LDELYIGKER(I)	99%	14.92	25	14.92	2		412.5594	1,234.66	3	25,708.20	0.0005461	436	0.4419	445	3,214.22
(K)LDELYIGKER(I)	98%	14.61	25	14.61	2		412.5592	1,234.66	3	14,396.80	-0.0001859	436	-0.1505	445	4,711.81
(K)LDELYIGKER(I)	98%	13.92	25	13.92	2		412.5593	1,234.66	3	13,993.30	0.0001801	436	0.1457	445	5,905.71
(K)LDELYIGKER(I)	98%	14.65	25	14.65	2		412.5592	1,234.66	3	22,357.20	-0.0002759	436	-0.2233	445	3,231.67
(K)LDELYIGKER(I)	98%	15.8	25	15.8	2		412.5587	1,234.65	3	10,269.20	-0.00165	436	-1.335	445	5,845.73
(K)LDELYIGKER(I)	98%	14.63	25	14.01	2		412.5591	1,234.66	3	10,385.80	-0.0003689	436	-0.2986	445	5,327.42
(K)LDELYIGKER(I)	98%	16.99	25	16.99	2		412.5584	1,234.65	3	19,744.00	-0.002658	436	-2.151	445	3,559.80
(K)LDELYIGKER(I)	97%	13.22	25	13.22	2		412.5594	1,234.66	3	13,944.00	0.0002731	436	0.221	445	6,002.65
(K)LDELYIGKER(I)	96%	16.59	25	16.59	2		412.5583	1,234.65	3	15,722.80	-0.002931	436	-2.372	445	3,836.34
(K)LDELYIGKER(I)	96%	16.47	25	14.4	2		412.5583	1,234.65	3	48,804.10	-0.002931	436	-2.372	445	2,587.31
(K)LDELYIGKER(I)	96%	14.9	25	9.31	2		412.5591	1,234.66	3	19,241.50	-0.0005519	436	-0.4467	445	3,581.57
(K)LDELYIGKER(I)	94%	11.96	25	10.86	2		412.5594	1,234.66	3	17,887.20	0.0003631	436	0.2938	445	6,398.43
(K)LDELYIGKER(I)	93%	11.61	25	11.16	2		412.5594	1,234.66	3	14,051.00	0.0005461	436	0.4419	445	6,079.30
(K)LDELYIGKER(I)	91%	11.65	25	0	2		412.5594	1,234.66	3	14,052.70	0.0002731	436	0.221	445	6,151.45
(K)LDELYIGKERI(C)	98%	15.14	25	15.14	1		450.2535	1,347.74	3	29,716.70	-0.001368	436	-1.014	446	2,938.79
(L)DELYIGKER(I)	100%	38.52	25	36.77	1		561.7961	1,121.58	2	150149	0.005742	437	5.115	445	3,972.82
(L)DELYIGKER(I)	100%	40.19	25	32.12	1		561.7934	1,121.57	2	128751	0.0003701	437	0.3296	445	2,148.71
(L)DELYIGKER(I)	100%	40.9	25	24.87	1		561.793	1,121.57	2	635780	-0.0004839	437	-0.4311	445	2,163.80
(L)DELYIGKER(I)	100%	36.6	25	22.02	1		561.793	1,121.57	2	117228	-0.0003619	437	-0.3224	445	2,179.74
(L)DELYIGKER(I)	100%	28.26	25	20.35	1		561.7934	1,121.57	2	34,025.60	0.0003701	437	0.3296	445	2,198.36
(L)DELYIGKER(I)	100%	28.72	25	14.02	1		561.793	1,121.57	2	27,953.10	-0.0004839	437	-0.4311	445	2,235.33
(L)DELYIGKER(I)	100%	24.07	25	18.76	1		561.7948	1,121.58	2	17,067.70	0.003178	437	2.831	445	1,935.70
(L)DELYIGKER(I)	100%	23.02	25	11.82	1		561.7929	1,121.57	2	32,055.70	-0.0006059	437	-0.5398	445	2,281.10
(L)DELYIGKER(I)	100%	23.15	25	10.57	1		561.793	1,121.57	2	33,341.50	-0.0003619	437	-0.3224	445	2,258.80
(L)DELYIGKER(I)	100%	22.25	25	14.55	1		561.7915	1,121.57	2	40,019.60	-0.003414	437	-3.041	445	2,216.69
(D)ELYIGKER(I)	99%	33.17	25	33.17	1		504.279	1,006.54	2	224936	-0.001438	438	-1.427	445	2,151.42
(D)ELYIGKER(I)	99%	31.31	25	31.31	1		504.279	1,006.54	2	213672	-0.001438	438	-1.427	445	2,166.53
(D)ELYIGKER(I)	99%	29.13	25	29.13	1		504.28	1,006.55	2	41,303.40	0.0006361	438	0.6313	445	2,184.33
(E)RIccDEESYVIFDTGTSYNTmPSSQMK(T)	96%	15.13	25	15.13	1	Carbamidomethyl (+57), Carbamidomethyl (+57), Oxidation (+16)	1,079.13	3,234.35	3	113767	-0.00698	445	-2.157	471	4,640.66
(R)IccDEESYVIFDTGTSYNTmPSSQmK(T)	99%	17.13	25	17.13	2	Carbamidomethyl (+57), Carbamidomethyl (+57), Oxidation (+16), Oxidation (+16)	1,032.42	3,094.25	3	24,892.10	-0.003576	446	-1.155	471	4,386.05
(I)ccDEESYVIFDTGTSYNTMPSSQmK(T)	100%	32.39	25	27.76	1	Carbamidomethyl (+57), Carbamidomethyl (+57), Oxidation (+16)	989.4073	2,965.20	3	1335940	0.0238	447	8.025	471	4,693.74
(I)ccDEESYVIFDTGTSYNTmPSSQMK(T)	100%	25.92	25	22.55	1	Carbamidomethyl (+57), Carbamidomethyl (+57), Oxidation (+16)	1,483.61	2,965.20	2	109018	0.02681	447	9.037	471	4,647.21
(I)ccDEESYVIFDTGTSYNTMPSSQmK(T)	99%	21.13	25	17.4	1	Carbamidomethyl (+57), Carbamidomethyl (+57), Oxidation (+16)	989.3976	2,965.17	3	93,325.00	-0.005495	447	-1.852	471	4,422.06
(I)ccDEESYVIFDTGTSYNTmPSSQMK(T)	96%	27.26	25	9.15	1	Carbamidomethyl (+57), Carbamidomethyl (+57), Oxidation (+16)	1,483.61	2,965.20	2	37,437.00	0.02583	447	8.708	471	4,672.72
(D)EESYVIFDTGTSYNTmPSSQmK(T)	100%	51.75	25	51.75	1	Oxidation (+16), Oxidation (+16)	1,274.05	2,546.09	2	17,682.10	0.00279	450	1.095	471	3,722.77
(Y)VIFDTGTSYNTmPSSQmK(T)	100%	33.36	25	33.36	1	Oxidation (+16), Oxidation (+16)	1,019.96	2,037.90	2	9,890.79	-0.002868	454	-1.407	471	2,701.91
(I)FDTGTSYNTmPSSQmK(T)	100%	59.93	25	59.93	1	Oxidation (+16), Oxidation (+16)	913.8834	1,825.75	2	720077	0.002172	456	1.189	471	4,422.89
(D)TGTSYNTMPSSQMK(T)	100%	68.65	25	68.65	1		766.8412	1,531.67	2	27,738.30	0.003174	458	2.071	471	1,989.61
(N)TMPSSQmK(T)	98%	14.13	25	14.13	1	Oxidation (+16)	463.2097	924.4049	2	5,114.30	0.000297	464	0.321	471	1,672.76
(N)TmPSSQmK(T)	96%	14.77	25	14.77	1	Oxidation (+16), Oxidation (+16)	471.2063	940.398	2	7,540.85	-0.001454	464	-1.544	471	1,402.68
(N)TmPSSQmK(T)	94%	11.84	25	11.84	1	Oxidation (+16), Oxidation (+16)	471.2073	940.4001	2	5,786.00	0.00056	464	0.5949	471	1,483.74
(N)TMPSSQmK(T)	92%	10.93	25	10.93	1	Oxidation (+16)	463.2098	924.405	2	6,264.45	0.000419	464	0.4528	471	1,687.97
(N)TMPSSQmK(T)	91%	9.41	25	9.41	1	Oxidation (+16)	463.2096	924.4047	2	7,270.27	0.000113	464	0.1222	471	1,703.12
(N)TMPSSQmK(T)	91%	12.66	25	9.14	1	Oxidation (+16)	463.21	924.4055	2	7,772.76	0.000907	464	0.9802	471	1,733.86
(K)TFLNLIHS(T)	99%	22.77	25	22.49	1		472.7635	943.5124	2	26,876.60	-0.0004059	472	-0.4298	479	3,844.99
(K)TFLNLIHS(T)	99%	21.57	25	21.57	1		472.7636	943.5126	2	43,403.20	-0.0001619	472	-0.1715	479	3,826.66
(K)TFLNLIHS(T)	91%	11.83	25	11.83	1		472.7633	943.5121	2	21,046.10	-0.0007099	472	-0.7516	479	3,862.98
(K)TFLNLIHST(A)	100%	23.59	25	23.59	1		523.287	1,044.56	2	53,641.10	-0.001048	472	-1.002	480	3,741.20
(K)TFLNLIHSTA(C)	100%	27.4	25	27.4	1		558.8061	1,115.60	2	67,436.50	0.00006006	472	0.05379	481	3,966.02
(K)TFLNLIHSTA(C)	100%	29.37	25	29.37	1		558.8064	1,115.60	2	657933	0.0006701	472	0.6001	481	3,824.74
(K)TFLNLIHSTA(C)	100%	35.68	25	35.68	1		558.8057	1,115.60	2	1217990	-0.0006719	472	-0.6018	481	3,806.40
(K)TFLNLIHSTA(C)	100%	26.41	25	26.41	1		558.8063	1,115.60	2	36,327.90	0.0005481	472	0.4908	481	4,105.08
(K)TFLNLIHSTA(C)	100%	27.23	25	27.23	1		558.8058	1,115.60	2	190961	-0.0005499	472	-0.4925	481	3,878.52
(K)TFLNLIHSTA(C)	100%	27.09	25	27.09	1		558.8059	1,115.60	2	78,762.80	-0.0003059	472	-0.274	481	3,930.89
(K)TFLNLIHSTA(C)	100%	24.84	25	24.84	1		558.8063	1,115.60	2	384173	0.0005481	472	0.4908	481	3,842.89
(K)TFLNLIHSTA(C)	100%	29.3	25	29.3	1		558.8066	1,115.60	2	107401	0.00116	472	1.039	481	3,913.02
(K)TFLNLIHSTA(C)	100%	27.45	25	27.45	1		558.8067	1,115.60	2	61,800.00	0.001282	472	1.148	481	3,982.78
(K)TFLNLIHSTA(C)	100%	25.55	25	25.55	1		558.8067	1,115.60	2	74,875.70	0.001282	472	1.148	481	3,947.84
(K)TFLNLIHSTA(C)	100%	33.56	25	33.56	1		558.8071	1,115.60	2	2045360	0.002136	472	1.913	481	3,789.78
(K)TFLNLIHSTA(C)	100%	33.43	25	33.43	1		558.8072	1,115.60	2	133484	0.002258	472	2.022	481	3,896.07
(K)TFLNLIHSTA(C)	100%	24.4	25	24.4	1		558.8069	1,115.60	2	54,733.20	0.001648	472	1.476	481	4,000.51
(K)TFLNLIHSTA(C)	100%	33.7	25	33.7	1		558.8052	1,115.60	2	1801710	-0.001648	472	-1.476	481	3,774.08
(K)TFLNLIHSTA(C)	100%	21.42	25	21.42	1		558.8066	1,115.60	2	29,367.60	0.00116	472	1.039	481	4,177.90
(K)TFLNLIHSTA(C)	100%	21.36	25	21.36	1		558.8069	1,115.60	2	45,953.20	0.00177	472	1.585	481	4,035.97
(K)TFLNLIHSTA(C)	99%	18.47	25	18.47	1		558.8054	1,115.60	2	36,174.20	-0.001404	472	-1.257	481	4,121.93
(K)TFLNLIHSTA(C)	99%	18.64	25	18.64	1		558.8076	1,115.60	2	150553	0.00299	472	2.678	481	3,757.79
(K)TFLNLIHSTA(C)	98%	14.34	25	14.34	1		558.8062	1,115.60	2	315404	0.0003041	472	0.2723	481	3,860.61
(K)TFLNLIHSTA(C)	96%	14.23	25	14.23	1		558.8069	1,115.60	2	49,812.90	0.00177	472	1.585	481	4,018.13
(K)TFLNLIHSTA(C)	96%	12.75	25	12.75	1		558.8061	1,115.60	2	21,390.50	0.00006006	472	0.05379	481	4,325.02
(K)TFLNLIHSTA(C)	95%	15.44	25	15.44	1		558.808	1,115.60	2	29,060.00	0.003844	472	3.443	481	4,159.05
(K)TFLNLIHSTA(C)	92%	11.53	25	11.53	1		558.8066	1,115.60	2	31,605.40	0.001038	472	0.9297	481	4,139.11
(K)TFLNLIHSTAcTEQNYK(D)	100%	37.22	25	37.22	2	Carbamidomethyl (+57)	680.67	2,038.99	3	27,726.20	0.009786	472	4.797	488	3,576.60
(K)TFLNLIHSTAcTEQNYK(D)	100%	21.6	25	21.6	2	Carbamidomethyl (+57)	680.6693	2,038.99	3	33,741.70	0.007587	472	3.719	488	3,639.82
(K)TFLNLIHSTAcTEQNYKDILK(S)	100%	62.69	25	62.69	2	Carbamidomethyl (+57)	837.0964	2,508.27	3	31,753.70	-0.001238	472	-0.4935	492	4,111.65
(K)TFLNLIHSTAcTEQNYKDILK(S)	100%	55.14	25	55.14	2	Carbamidomethyl (+57)	837.0983	2,508.27	3	27,272.40	0.004438	472	1.769	492	4,222.75
(K)TFLNLIHSTAcTEQNYKDILK(S)	100%	55.71	25	55.71	2	Carbamidomethyl (+57)	837.1026	2,508.29	3	26,108.00	0.01744	472	6.949	492	4,311.35
(C)TEQNYKDILK(S)	100%	40.55	25	40.55	1		417.8912	1,250.65	3	76,615.20	0.001007	483	0.8046	492	1,977.52
(T)EQNYKDILK(S)	100%	45.36	25	30.82	1		575.8094	1,149.60	2	35,045.00	0.001052	484	0.9143	492	1,978.40
(E)QNYKDILK(S)	99%	40.77	25	32.57	1		511.2877	1,020.56	2	25,273.60	0.0001961	485	0.1919	492	1,910.39
(K)DILKSYPIIK(Y)	100%	40.25	25	40.25	2		595.363	1,188.71	2	111881	-0.0006699	489	-0.5631	498	3,075.51
(K)DILKSYPIIK(Y)	100%	39.57	25	39.57	2		595.363	1,188.71	2	41,529.30	-0.0006699	489	-0.5631	498	3,110.54
(K)DILKSYPIIK(Y)	100%	38.05	25	38.05	2		595.3635	1,188.71	2	20,384.80	0.0003061	489	0.2573	498	3,190.83
(K)DILKSYPIIK(Y)	100%	52.47	25	52.47	2		595.3635	1,188.71	2	282786	0.0003061	489	0.2573	498	3,092.85
(K)DILKSYPIIK(Y)	100%	27.87	25	27.87	2		595.3628	1,188.71	2	18,170.90	-0.001036	489	-0.8707	498	3,142.51
(K)YVFGELIIELHPEEYmILNDDVcmPAYmQIDVPSER(N)	100%	35.58	25	33.58	2	Oxidation (+16), Carbamidomethyl (+57), Oxidation (+16), Oxidation (+16)	1,459.68	4,376.03	3	14,408.20	0.02697	499	6.162	534	6,377.27
(K)YVFGELIIELHPEEYmILNDDVcmPAYMQIDVPSER(N)	100%	24.89	25	18.07	2	Oxidation (+16), Carbamidomethyl (+57), Oxidation (+16)	1,454.35	4,360.04	3	5,376.58	0.02909	499	6.67	534	6,416.85
(K)YVFGELIIELHPEEYMILNDDVcMPAYmQIDVPSER(N)	98%	49.68	25	12.43	2	Carbamidomethyl (+57), Oxidation (+16)	1,449.00	4,343.97	3	8,803.33	-0.04131	499	-9.506	534	6,375.24
(C)MPAYmQIDVPSER(N)	100%	60.43	25	42.86	1	Oxidation (+16)	776.8606	1,551.71	2	35,036.20	0.000355	522	0.2287	534	2,933.71
(C)mPAYMQIDVPSER(N)	100%	66.55	25	44.05	1	Oxidation (+16)	776.8604	1,551.71	2	76,655.80	-0.00001095	522	-0.007052	534	3,244.99
(C)mPAYMQIDVPSER(N)	100%	65.6	25	43.79	1	Oxidation (+16)	776.8609	1,551.71	2	35,821.50	0.000965	522	0.6215	534	3,227.02
(C)mPAYmQIDVPSER(N)	100%	66.59	25	66.59	1	Oxidation (+16), Oxidation (+16)	784.8579	1,567.70	2	43,765.80	0.00006804	522	0.04337	534	2,526.96
(C)MPAYmQIDVPSER(N)	100%	59.43	25	41.26	1	Oxidation (+16)	776.8613	1,551.71	2	70,892.60	0.001697	522	1.093	534	2,951.74
(C)MPAYMQIDVPSER(N)	100%	63.87	25	63.87	1		768.8629	1,535.71	2	56,011.10	-0.0002139	522	-0.1392	534	3,693.83
(C)mPAYmQIDVPSER(N)	100%	67.93	25	67.93	1	Oxidation (+16), Oxidation (+16)	784.8583	1,567.70	2	103145	0.0008	522	0.51	534	2,561.71
(C)mPAYmQIDVPSER(N)	100%	69.77	25	69.77	1	Oxidation (+16), Oxidation (+16)	784.8583	1,567.70	2	223598	0.0008	522	0.51	534	2,544.01
(C)mPAYmQIDVPSER(N)	100%	69.51	25	69.51	1	Oxidation (+16), Oxidation (+16)	784.8586	1,567.70	2	17,412.40	0.001534	522	0.9779	534	2,579.69
(C)MPAYMQIDVPSER(N)	100%	50.56	25	50.56	1		768.8617	1,535.71	2	40,948.80	-0.002534	522	-1.649	534	3,711.31
(C)mPAYmQIDVPSER(N)	100%	29.21	25	29.21	1	Oxidation (+16), Oxidation (+16)	784.8599	1,567.71	2	12,091.10	0.004096	522	2.611	534	2,674.11
(C)MPAYmQIDVPSER(N)	100%	37.2	25	37.2	1	Oxidation (+16)	776.8651	1,551.72	2	11,619.00	0.009265	522	5.967	534	2,992.06
(C)MPAYmQIDVPSER(N)	99%	20.78	25	20.78	1	Oxidation (+16)	776.8635	1,551.71	2	47,386.20	0.006213	522	4.001	534	2,971.01
[truncated: 1,022 more rows]
